# Supplementary material for: Extracorporeal Cardiac Shock Waves Therapy Improves the Function of Endothelial Progenitor Cells After Hypoxia Injury via Activating PI3K/Akt/eNOS Signal Pathway
Source: Front Cardiovasc Med. 2021 Oct 11;8:747497. doi: 10.3389/fcvm.2021.747497 (PMC8542843; doi:10.3389/fcvm.2021.747497)
Supplement: Supplementary Table 1 — EPCs_Control vs. EPCs_Hypoxia_GO_enrichment.xlsx. [file Table_1.XLSX]

## Sheet: Sheet1
GO_ID	GO_Term	GO_function	GO_class	S gene number	TS gene number	B gene number	TB gene number	pvalue
GO:0005615	extracellular space	cellular_component	4	171	1099	1133	17317	0
GO:0071222	cellular response to lipopolysaccharide	biological_process	8	37	1099	159	17317	3.23197e-12
GO:0032496	response to lipopolysaccharide	biological_process	7	45	1099	243	17317	6.67083e-11
GO:0010469	regulation of receptor activity	biological_process	8	46	1099	259	17317	1.76548e-10
GO:0003777	microtubule motor activity	molecular_function	10	20	1099	61	17317	4.85665e-10
GO:0005871	kinesin complex	cellular_component	5	17	1099	50	17317	5.19107e-09
GO:0042493	response to drug	biological_process	5	60	1099	428	17317	5.55607e-09
GO:0007018	microtubule-based movement	biological_process	5	21	1099	76	17317	5.98038e-09
GO:0006006	glucose metabolic process	biological_process	8	20	1099	70	17317	7.28437e-09
GO:0071456	cellular response to hypoxia	biological_process	6	27	1099	130	17317	3.65698e-08
GO:0006096	glycolytic process	biological_process	10	18	1099	65	17317	6.98621e-08
GO:0001666	response to hypoxia	biological_process	5	38	1099	234	17317	8.13572e-08
GO:0005886	plasma membrane	cellular_component	4	235	1099	2711	17317	1.28081e-07
GO:0071407	cellular response to organic cyclic compound	biological_process	7	22	1099	97	17317	1.29754e-07
GO:0050873	brown fat cell differentiation	biological_process	7	13	1099	37	17317	2.14702e-07
GO:0070062	extracellular exosome	cellular_component	7	205	1099	2320	17317	2.57949e-07
GO:0051384	response to glucocorticoid	biological_process	8	22	1099	104	17317	4.73216e-07
GO:0006953	acute-phase response	biological_process	8	11	1099	28	17317	5.04029e-07
GO:0008017	microtubule binding	molecular_function	7	37	1099	241	17317	5.09924e-07
GO:0070098	chemokine-mediated signaling pathway	biological_process	7	14	1099	46	17317	5.58035e-07
GO:0009612	response to mechanical stimulus	biological_process	5	20	1099	89	17317	5.61818e-07
GO:0006955	immune response	biological_process	4	33	1099	205	17317	7.02545e-07
GO:0032355	response to estradiol	biological_process	6	28	1099	167	17317	2.12106e-06
GO:0008009	chemokine activity	molecular_function	8	11	1099	32	17317	2.39275e-06
GO:0007059	chromosome segregation	biological_process	4	18	1099	81	17317	2.43298e-06
GO:0031012	extracellular matrix	cellular_component	4	40	1099	290	17317	2.93902e-06
GO:0007584	response to nutrient	biological_process	7	22	1099	116	17317	3.28301e-06
GO:0043627	response to estrogen	biological_process	4	19	1099	91	17317	3.46851e-06
GO:0005576	extracellular region	cellular_component	3	66	1099	585	17317	3.63433e-06
GO:0008395	steroid hydroxylase activity	molecular_function	6	9	1099	22	17317	3.78297e-06
GO:0042383	sarcolemma	cellular_component	5	21	1099	109	17317	4.20653e-06
GO:0050731	positive regulation of peptidyl-tyrosine phosphorylation	biological_process	11	19	1099	94	17317	5.74267e-06
GO:0008574	ATP-dependent microtubule motor activity, plus-end-directed	molecular_function	12	10	1099	29	17317	6.70401e-06
GO:0005125	cytokine activity	molecular_function	7	22	1099	124	17317	1.01347e-05
GO:0006954	inflammatory response	biological_process	6	36	1099	263	17317	1.07796e-05
GO:0046888	negative regulation of hormone secretion	biological_process	8	6	1099	10	17317	1.08474e-05
GO:0045837	negative regulation of membrane potential	biological_process	6	4	1099	4	17317	1.6139e-05
GO:0008284	positive regulation of cell proliferation	biological_process	7	51	1099	437	17317	1.861e-05
GO:0014823	response to activity	biological_process	4	16	1099	77	17317	2.15065e-05
GO:0045236	CXCR chemokine receptor binding	molecular_function	8	6	1099	11	17317	2.25788e-05
GO:0008083	growth factor activity	molecular_function	7	21	1099	122	17317	2.57356e-05
GO:0072562	blood microparticle	cellular_component	4	16	1099	80	17317	3.54354e-05
GO:0014070	response to organic cyclic compound	biological_process	6	31	1099	225	17317	3.80058e-05
GO:0009636	response to toxic substance	biological_process	5	19	1099	107	17317	3.95156e-05
GO:0030593	neutrophil chemotaxis	biological_process	7	12	1099	49	17317	4.14202e-05
GO:0008179	adenylate cyclase binding	molecular_function	6	5	1099	8	17317	4.86111e-05
GO:0006082	organic acid metabolic process	biological_process	5	8	1099	23	17317	5.32884e-05
GO:0043065	positive regulation of apoptotic process	biological_process	9	40	1099	329	17317	5.87756e-05
GO:0005887	integral component of plasma membrane	cellular_component	6	79	1099	803	17317	6.34381e-05
GO:0070301	cellular response to hydrogen peroxide	biological_process	8	16	1099	84	17317	6.60869e-05
GO:0032026	response to magnesium ion	biological_process	7	7	1099	18	17317	6.96061e-05
GO:0007422	peripheral nervous system development	biological_process	6	7	1099	18	17317	6.96061e-05
GO:0017144	drug metabolic process	biological_process	5	7	1099	18	17317	6.96061e-05
GO:0007568	aging	biological_process	4	35	1099	276	17317	7.15802e-05
GO:0071872	cellular response to epinephrine stimulus	biological_process	9	6	1099	13	17317	7.50876e-05
GO:0045630	positive regulation of T-helper 2 cell differentiation	biological_process	9	4	1099	5	17317	7.66121e-05
GO:0005509	calcium ion binding	molecular_function	7	61	1099	583	17317	8.02968e-05
GO:0043524	negative regulation of neuron apoptotic process	biological_process	10	21	1099	133	17317	9.51006e-05
GO:0071320	cellular response to cAMP	biological_process	9	14	1099	70	17317	0.000107617
GO:0042060	wound healing	biological_process	6	18	1099	106	17317	0.000114069
GO:0015630	microtubule cytoskeleton	cellular_component	7	26	1099	187	17317	0.000134131
GO:0070373	negative regulation of ERK1 and ERK2 cascade	biological_process	12	13	1099	63	17317	0.000134877
GO:0001968	fibronectin binding	molecular_function	5	8	1099	26	17317	0.000143126
GO:0031100	animal organ regeneration	biological_process	6	14	1099	72	17317	0.000147796
GO:0015293	symporter activity	molecular_function	7	10	1099	40	17317	0.000149628
GO:0014911	positive regulation of smooth muscle cell migration	biological_process	9	10	1099	40	17317	0.000149628
GO:0042594	response to starvation	biological_process	5	10	1099	40	17317	0.000149628
GO:0032869	cellular response to insulin stimulus	biological_process	8	18	1099	109	17317	0.000164633
GO:0009611	response to wounding	biological_process	5	14	1099	73	17317	0.000172344
GO:0051591	response to cAMP	biological_process	8	14	1099	73	17317	0.000172344
GO:0001889	liver development	biological_process	7	19	1099	121	17317	0.000216562
GO:0060426	lung vasculature development	biological_process	7	4	1099	6	17317	0.000218232
GO:0051988	regulation of attachment of spindle microtubules to kinetochore	biological_process	8	4	1099	6	17317	0.000218232
GO:0019933	cAMP-mediated signaling	biological_process	8	8	1099	28	17317	0.000254153
GO:0071385	cellular response to glucocorticoid stimulus	biological_process	9	8	1099	28	17317	0.000254153
GO:0015349	thyroid hormone transmembrane transporter activity	molecular_function	7	3	1099	3	17317	0.000254955
GO:0030505	inorganic diphosphate transport	biological_process	9	3	1099	3	17317	0.000254955
GO:0048569	post-embryonic animal organ development	biological_process	6	3	1099	3	17317	0.000254955
GO:0097149	centralspindlin complex	cellular_component	4	3	1099	3	17317	0.000254955
GO:0002526	acute inflammatory response	biological_process	7	7	1099	22	17317	0.000298039
GO:0045121	membrane raft	cellular_component	6	32	1099	264	17317	0.000328351
GO:0055117	regulation of cardiac muscle contraction	biological_process	10	5	1099	11	17317	0.000341318
GO:0051310	metaphase plate congression	biological_process	8	5	1099	11	17317	0.000341318
GO:0071347	cellular response to interleukin-1	biological_process	8	15	1099	87	17317	0.000348891
GO:0051897	positive regulation of protein kinase B signaling	biological_process	10	15	1099	88	17317	0.000396346
GO:0019221	cytokine-mediated signaling pathway	biological_process	6	19	1099	128	17317	0.000451237
GO:0045835	negative regulation of meiotic nuclear division	biological_process	9	4	1099	7	17317	0.000483557
GO:0042743	hydrogen peroxide metabolic process	biological_process	7	5	1099	12	17317	0.000554597
GO:0045599	negative regulation of fat cell differentiation	biological_process	8	10	1099	48	17317	0.000726981
GO:0031953	negative regulation of protein autophosphorylation	biological_process	11	5	1099	13	17317	0.00085429
GO:0005874	microtubule	cellular_component	7	30	1099	256	17317	0.000868925
GO:0050661	NADP binding	molecular_function	6	9	1099	41	17317	0.000893127
GO:0071248	cellular response to metal ion	biological_process	7	4	1099	8	17317	0.000918502
GO:0071474	cellular hyperosmotic response	biological_process	7	4	1099	8	17317	0.000918502
GO:0042542	response to hydrogen peroxide	biological_process	7	12	1099	67	17317	0.000936808
GO:0003081	regulation of systemic arterial blood pressure by renin-angiotensin	biological_process	9	3	1099	4	17317	0.000971404
GO:0032878	regulation of establishment or maintenance of cell polarity	biological_process	6	3	1099	4	17317	0.000971404
GO:0009812	flavonoid metabolic process	biological_process	5	3	1099	4	17317	0.000971404
GO:0017143	insecticide metabolic process	biological_process	6	3	1099	4	17317	0.000971404
GO:0019661	glucose catabolic process to lactate via pyruvate	biological_process	5	3	1099	4	17317	0.000971404
GO:0048403	brain-derived neurotrophic factor binding	molecular_function	7	3	1099	4	17317	0.000971404
GO:0004807	triose-phosphate isomerase activity	molecular_function	7	3	1099	4	17317	0.000971404
GO:0005901	caveola	cellular_component	8	13	1099	77	17317	0.00103863
GO:0044344	cellular response to fibroblast growth factor stimulus	biological_process	8	8	1099	34	17317	0.00105699
GO:0009408	response to heat	biological_process	5	12	1099	68	17317	0.00107306
GO:0006094	gluconeogenesis	biological_process	9	9	1099	42	17317	0.00107362
GO:0042803	protein homodimerization activity	molecular_function	6	74	1099	815	17317	0.00113158
GO:0055114	oxidation-reduction process	biological_process	4	55	1099	568	17317	0.00116119
GO:0010628	positive regulation of gene expression	biological_process	8	39	1099	368	17317	0.00116645
GO:0070374	positive regulation of ERK1 and ERK2 cascade	biological_process	12	26	1099	215	17317	0.00118157
GO:0017085	response to insecticide	biological_process	6	5	1099	14	17317	0.00125981
GO:0015718	monocarboxylic acid transport	biological_process	10	5	1099	14	17317	0.00125981
GO:0030595	leukocyte chemotaxis	biological_process	5	5	1099	14	17317	0.00125981
GO:0008028	monocarboxylic acid transmembrane transporter activity	molecular_function	7	5	1099	14	17317	0.00125981
GO:0043005	neuron projection	cellular_component	5	43	1099	419	17317	0.00127754
GO:0004497	monooxygenase activity	molecular_function	5	9	1099	43	17317	0.00128251
GO:0048662	negative regulation of smooth muscle cell proliferation	biological_process	8	8	1099	35	17317	0.00129498
GO:0071805	potassium ion transmembrane transport	biological_process	10	15	1099	99	17317	0.00140226
GO:0001822	kidney development	biological_process	6	18	1099	130	17317	0.00143746
GO:0060416	response to growth hormone	biological_process	7	6	1099	21	17317	0.00153029
GO:0006629	lipid metabolic process	biological_process	5	15	1099	100	17317	0.00155508
GO:0006089	lactate metabolic process	biological_process	9	4	1099	9	17317	0.00157039
GO:0070886	positive regulation of calcineurin-NFAT signaling cascade	biological_process	12	4	1099	9	17317	0.00157039
GO:0008608	attachment of spindle microtubules to kinetochore	biological_process	5	4	1099	9	17317	0.00157039
GO:0006805	xenobiotic metabolic process	biological_process	5	8	1099	36	17317	0.00157368
GO:0009986	cell surface	cellular_component	4	52	1099	538	17317	0.00162519
GO:0001934	positive regulation of protein phosphorylation	biological_process	10	22	1099	175	17317	0.001661
GO:0035690	cellular response to drug	biological_process	6	13	1099	81	17317	0.00167849
GO:0007204	positive regulation of cytosolic calcium ion concentration	biological_process	13	16	1099	111	17317	0.00169146
GO:0007623	circadian rhythm	biological_process	4	15	1099	101	17317	0.0017216
GO:0030502	negative regulation of bone mineralization	biological_process	8	5	1099	15	17317	0.00179165
GO:2000406	positive regulation of T cell migration	biological_process	9	5	1099	15	17317	0.00179165
GO:0002690	positive regulation of leukocyte chemotaxis	biological_process	8	5	1099	15	17317	0.00179165
GO:0005882	intermediate filament	cellular_component	7	9	1099	45	17317	0.00179829
GO:0008202	steroid metabolic process	biological_process	6	7	1099	29	17317	0.00184602
GO:0016887	ATPase activity	molecular_function	9	24	1099	199	17317	0.00185708
GO:0004252	serine-type endopeptidase activity	molecular_function	8	16	1099	113	17317	0.00204208
GO:0071346	cellular response to interferon-gamma	biological_process	8	15	1099	103	17317	0.00209948
GO:0031667	response to nutrient levels	biological_process	6	14	1099	93	17317	0.00212415
GO:0005623	cell	cellular_component	3	14	1099	93	17317	0.00212415
GO:0000281	mitotic cytokinesis	biological_process	7	10	1099	55	17317	0.00217327
GO:0048678	response to axon injury	biological_process	6	8	1099	38	17317	0.00227235
GO:0051602	response to electrical stimulus	biological_process	5	8	1099	38	17317	0.00227235
GO:0007160	cell-matrix adhesion	biological_process	6	12	1099	74	17317	0.00227984
GO:0071241	cellular response to inorganic substance	biological_process	6	3	1099	5	17317	0.00231359
GO:0001922	B-1 B cell homeostasis	biological_process	7	3	1099	5	17317	0.00231359
GO:2000481	positive regulation of cAMP-dependent protein kinase activity	biological_process	13	3	1099	5	17317	0.00231359
GO:0071638	negative regulation of monocyte chemotactic protein-1 production	biological_process	9	3	1099	5	17317	0.00231359
GO:0016004	phospholipase activator activity	molecular_function	7	3	1099	5	17317	0.00231359
GO:0004457	lactate dehydrogenase activity	molecular_function	6	3	1099	5	17317	0.00231359
GO:2000344	positive regulation of acrosome reaction	biological_process	8	3	1099	5	17317	0.00231359
GO:0019682	glyceraldehyde-3-phosphate metabolic process	biological_process	6	3	1099	5	17317	0.00231359
GO:0004551	nucleotide diphosphatase activity	molecular_function	8	3	1099	5	17317	0.00231359
GO:0043619	regulation of transcription from RNA polymerase II promoter in response to oxidative stress	biological_process	11	3	1099	5	17317	0.00231359
GO:0004499	N,N-dimethylaniline monooxygenase activity	molecular_function	7	3	1099	5	17317	0.00231359
GO:0046166	glyceraldehyde-3-phosphate biosynthetic process	biological_process	7	3	1099	5	17317	0.00231359
GO:0071378	cellular response to growth hormone stimulus	biological_process	8	3	1099	5	17317	0.00231359
GO:0060708	spongiotrophoblast differentiation	biological_process	6	3	1099	5	17317	0.00231359
GO:0070327	thyroid hormone transport	biological_process	7	3	1099	5	17317	0.00231359
GO:1903352	L-ornithine transmembrane transport	biological_process	8	3	1099	5	17317	0.00231359
GO:0071260	cellular response to mechanical stimulus	biological_process	6	13	1099	84	17317	0.00234785
GO:0008144	drug binding	molecular_function	4	14	1099	94	17317	0.00235351
GO:0005614	interstitial matrix	cellular_component	6	5	1099	16	17317	0.00247102
GO:0016918	retinal binding	molecular_function	7	4	1099	10	17317	0.00248636
GO:0042403	thyroid hormone metabolic process	biological_process	6	4	1099	10	17317	0.00248636
GO:0008237	metallopeptidase activity	molecular_function	7	10	1099	56	17317	0.00249822
GO:0007420	brain development	biological_process	6	30	1099	274	17317	0.00252078
GO:0016712	oxidoreductase activity, acting on paired donors, with incorporation or reduction of molecular oxygen, reduced flavin or flavoprotein as one donor, and incorporation of one atom of oxygen	molecular_function	6	6	1099	23	17317	0.0025526
GO:0023052	signaling	biological_process	3	6	1099	23	17317	0.0025526
GO:0030552	cAMP binding	molecular_function	7	6	1099	23	17317	0.0025526
GO:0005516	calmodulin binding	molecular_function	5	18	1099	137	17317	0.00260106
GO:0005876	spindle microtubule	cellular_component	8	8	1099	39	17317	0.00270246
GO:0005249	voltage-gated potassium channel activity	molecular_function	9	9	1099	48	17317	0.00286958
GO:0006816	calcium ion transport	biological_process	10	13	1099	86	17317	0.00290528
GO:0031982	vesicle	cellular_component	5	20	1099	161	17317	0.00303405
GO:0000922	spindle pole	cellular_component	6	14	1099	97	17317	0.00316705
GO:0005496	steroid binding	molecular_function	5	8	1099	40	17317	0.00319355
GO:0071345	cellular response to cytokine stimulus	biological_process	7	8	1099	40	17317	0.00319355
GO:0002548	monocyte chemotaxis	biological_process	6	6	1099	24	17317	0.00322319
GO:0071549	cellular response to dexamethasone stimulus	biological_process	7	10	1099	58	17317	0.00326455
GO:0048020	CCR chemokine receptor binding	molecular_function	8	5	1099	17	17317	0.00331958
GO:2001171	positive regulation of ATP biosynthetic process	biological_process	12	5	1099	17	17317	0.00331958
GO:0090026	positive regulation of monocyte chemotaxis	biological_process	9	5	1099	17	17317	0.00331958
GO:0072686	mitotic spindle	cellular_component	7	11	1099	68	17317	0.00348769
GO:0000776	kinetochore	cellular_component	4	13	1099	88	17317	0.00356622
GO:0048661	positive regulation of smooth muscle cell proliferation	biological_process	8	12	1099	78	17317	0.00357675
GO:0071305	cellular response to vitamin D	biological_process	8	4	1099	11	17317	0.0037121
GO:0014012	peripheral nervous system axon regeneration	biological_process	8	4	1099	11	17317	0.0037121
GO:0043922	negative regulation by host of viral transcription	biological_process	10	4	1099	11	17317	0.0037121
GO:1903298	negative regulation of hypoxia-induced intrinsic apoptotic signaling pathway	biological_process	8	4	1099	11	17317	0.0037121
GO:0032966	negative regulation of collagen biosynthetic process	biological_process	8	4	1099	11	17317	0.0037121
GO:0042531	positive regulation of tyrosine phosphorylation of STAT protein	biological_process	11	8	1099	41	17317	0.00375123
GO:0016323	basolateral plasma membrane	cellular_component	5	22	1099	187	17317	0.00381212
GO:0014065	phosphatidylinositol 3-kinase signaling	biological_process	8	6	1099	25	17317	0.00401671
GO:0008282	inward rectifying potassium channel	cellular_component	9	2	1099	2	17317	0.0040242
GO:1903984	positive regulation of TRAIL-activated apoptotic signaling pathway	biological_process	12	2	1099	2	17317	0.0040242
GO:0009804	coumarin metabolic process	biological_process	7	2	1099	2	17317	0.0040242
GO:0002793	positive regulation of peptide secretion	biological_process	9	2	1099	2	17317	0.0040242
GO:0072239	metanephric glomerulus vasculature development	biological_process	7	2	1099	2	17317	0.0040242
GO:0008396	oxysterol 7-alpha-hydroxylase activity	molecular_function	7	2	1099	2	17317	0.0040242
GO:0008269	JAK pathway signal transduction adaptor activity	molecular_function	7	2	1099	2	17317	0.0040242
GO:0045159	myosin II binding	molecular_function	7	2	1099	2	17317	0.0040242
GO:0072592	oxygen metabolic process	biological_process	6	2	1099	2	17317	0.0040242
GO:0070664	negative regulation of leukocyte proliferation	biological_process	8	2	1099	2	17317	0.0040242
GO:0001970	positive regulation of activation of membrane attack complex	biological_process	9	2	1099	2	17317	0.0040242
GO:1904880	response to hydrogen sulfide	biological_process	6	2	1099	2	17317	0.0040242
GO:0060401	cytosolic calcium ion transport	biological_process	11	2	1099	2	17317	0.0040242
GO:0071250	cellular response to nitrite	biological_process	7	2	1099	2	17317	0.0040242
GO:0004118	cGMP-stimulated cyclic-nucleotide phosphodiesterase activity	molecular_function	10	2	1099	2	17317	0.0040242
GO:0034242	negative regulation of syncytium formation by plasma membrane fusion	biological_process	7	2	1099	2	17317	0.0040242
GO:0097125	cyclin B1-CDK1 complex	cellular_component	6	2	1099	2	17317	0.0040242
GO:0030977	taurine binding	molecular_function	7	2	1099	2	17317	0.0040242
GO:0071400	cellular response to oleic acid	biological_process	8	2	1099	2	17317	0.0040242
GO:1905448	positive regulation of mitochondrial ATP synthesis coupled electron transport	biological_process	9	2	1099	2	17317	0.0040242
GO:0006507	GPI anchor release	biological_process	10	2	1099	2	17317	0.0040242
GO:1900138	negative regulation of phospholipase A2 activity	biological_process	10	2	1099	2	17317	0.0040242
GO:1990622	CHOP-ATF3 complex	cellular_component	4	2	1099	2	17317	0.0040242
GO:1904427	positive regulation of calcium ion transmembrane transport	biological_process	10	2	1099	2	17317	0.0040242
GO:0009822	alkaloid catabolic process	biological_process	7	2	1099	2	17317	0.0040242
GO:0001962	alpha-1,3-galactosyltransferase activity	molecular_function	8	2	1099	2	17317	0.0040242
GO:0002724	regulation of T cell cytokine production	biological_process	10	2	1099	2	17317	0.0040242
GO:0004618	phosphoglycerate kinase activity	molecular_function	7	2	1099	2	17317	0.0040242
GO:0005506	iron ion binding	molecular_function	8	18	1099	143	17317	0.00414552
GO:0010951	negative regulation of endopeptidase activity	biological_process	11	14	1099	100	17317	0.00419741
GO:0043209	myelin sheath	cellular_component	4	24	1099	212	17317	0.00425082
GO:0016209	antioxidant activity	molecular_function	3	5	1099	18	17317	0.00435905
GO:0071560	cellular response to transforming growth factor beta stimulus	biological_process	8	11	1099	70	17317	0.00438689
GO:0045471	response to ethanol	biological_process	6	19	1099	155	17317	0.0044044
GO:0031581	hemidesmosome assembly	biological_process	8	3	1099	6	17317	0.00440895
GO:0032680	regulation of tumor necrosis factor production	biological_process	8	3	1099	6	17317	0.00440895
GO:0043067	regulation of programmed cell death	biological_process	7	3	1099	6	17317	0.00440895
GO:0010818	T cell chemotaxis	biological_process	7	3	1099	6	17317	0.00440895
GO:0007171	activation of transmembrane receptor protein tyrosine kinase activity	biological_process	13	3	1099	6	17317	0.00440895
GO:0031726	CCR1 chemokine receptor binding	molecular_function	9	3	1099	6	17317	0.00440895
GO:0032364	oxygen homeostasis	biological_process	8	3	1099	6	17317	0.00440895
GO:0001973	adenosine receptor signaling pathway	biological_process	7	3	1099	6	17317	0.00440895
GO:0008285	negative regulation of cell proliferation	biological_process	7	35	1099	348	17317	0.00475056
GO:0050840	extracellular matrix binding	molecular_function	4	6	1099	26	17317	0.00494591
GO:0000070	mitotic sister chromatid segregation	biological_process	8	6	1099	26	17317	0.00494591
GO:0050729	positive regulation of inflammatory response	biological_process	9	9	1099	52	17317	0.00501771
GO:0000940	condensed chromosome outer kinetochore	cellular_component	4	4	1099	12	17317	0.00529085
GO:0006098	pentose-phosphate shunt	biological_process	7	4	1099	12	17317	0.00529085
GO:0045821	positive regulation of glycolytic process	biological_process	11	4	1099	12	17317	0.00529085
GO:0031214	biomineral tissue development	biological_process	6	4	1099	12	17317	0.00529085
GO:0035686	sperm fibrous sheath	cellular_component	5	4	1099	12	17317	0.00529085
GO:1990023	mitotic spindle midzone	cellular_component	7	4	1099	12	17317	0.00529085
GO:0001525	angiogenesis	biological_process	5	21	1099	181	17317	0.00543786
GO:0002687	positive regulation of leukocyte migration	biological_process	7	5	1099	19	17317	0.005611
GO:0038191	neuropilin binding	molecular_function	6	5	1099	19	17317	0.005611
GO:0048247	lymphocyte chemotaxis	biological_process	6	5	1099	19	17317	0.005611
GO:0097066	response to thyroid hormone	biological_process	6	5	1099	19	17317	0.005611
GO:0009617	response to bacterium	biological_process	7	7	1099	35	17317	0.00570576
GO:0007565	female pregnancy	biological_process	5	13	1099	93	17317	0.00576176
GO:0007162	negative regulation of cell adhesion	biological_process	6	8	1099	44	17317	0.00588212
GO:0021987	cerebral cortex development	biological_process	5	12	1099	83	17317	0.00597049
GO:0019900	kinase binding	molecular_function	6	14	1099	104	17317	0.00597768
GO:0020037	heme binding	molecular_function	6	14	1099	104	17317	0.00597768
GO:0090023	positive regulation of neutrophil chemotaxis	biological_process	10	6	1099	27	17317	0.00602363
GO:0001649	osteoblast differentiation	biological_process	6	13	1099	94	17317	0.00630877
GO:0004222	metalloendopeptidase activity	molecular_function	8	13	1099	94	17317	0.00630877
GO:0000775	chromosome, centromeric region	cellular_component	7	9	1099	54	17317	0.00647733
GO:0004860	protein kinase inhibitor activity	molecular_function	7	10	1099	64	17317	0.00672675
GO:0051287	NAD binding	molecular_function	6	10	1099	64	17317	0.00672675
GO:0046426	negative regulation of JAK-STAT cascade	biological_process	10	8	1099	45	17317	0.00676511
GO:0006469	negative regulation of protein kinase activity	biological_process	11	14	1099	106	17317	0.00707089
GO:0045499	chemorepellent activity	molecular_function	7	5	1099	20	17317	0.00709651
GO:0000302	response to reactive oxygen species	biological_process	6	5	1099	20	17317	0.00709651
GO:0045671	negative regulation of osteoclast differentiation	biological_process	10	5	1099	20	17317	0.00709651
GO:1901653	cellular response to peptide	biological_process	8	5	1099	20	17317	0.00709651
GO:2000251	positive regulation of actin cytoskeleton reorganization	biological_process	10	5	1099	20	17317	0.00709651
GO:0007051	spindle organization	biological_process	8	5	1099	20	17317	0.00709651
GO:0010739	positive regulation of protein kinase A signaling	biological_process	10	4	1099	13	17317	0.00726265
GO:0005242	inward rectifier potassium channel activity	molecular_function	10	4	1099	13	17317	0.00726265
GO:1901741	positive regulation of myoblast fusion	biological_process	11	4	1099	13	17317	0.00726265
GO:0002052	positive regulation of neuroblast proliferation	biological_process	10	4	1099	13	17317	0.00726265
GO:0007019	microtubule depolymerization	biological_process	9	4	1099	13	17317	0.00726265
GO:0033591	response to L-ascorbic acid	biological_process	6	4	1099	13	17317	0.00726265
GO:0032467	positive regulation of cytokinesis	biological_process	9	6	1099	28	17317	0.00726267
GO:0055072	iron ion homeostasis	biological_process	11	6	1099	28	17317	0.00726267
GO:0070888	E-box binding	molecular_function	11	6	1099	28	17317	0.00726267
GO:0032570	response to progesterone	biological_process	6	9	1099	55	17317	0.00731943
GO:0071277	cellular response to calcium ion	biological_process	8	9	1099	55	17317	0.00731943
GO:0034115	negative regulation of heterotypic cell-cell adhesion	biological_process	8	3	1099	7	17317	0.007353
GO:1903599	positive regulation of autophagy of mitochondrion	biological_process	10	3	1099	7	17317	0.007353
GO:0045616	regulation of keratinocyte differentiation	biological_process	9	3	1099	7	17317	0.007353
GO:0045933	positive regulation of muscle contraction	biological_process	9	3	1099	7	17317	0.007353
GO:0042609	CD4 receptor binding	molecular_function	6	3	1099	7	17317	0.007353
GO:0004459	L-lactate dehydrogenase activity	molecular_function	7	3	1099	7	17317	0.007353
GO:0070995	NADPH oxidation	biological_process	5	3	1099	7	17317	0.007353
GO:1901642	nucleoside transmembrane transport	biological_process	9	3	1099	7	17317	0.007353
GO:0090036	regulation of protein kinase C signaling	biological_process	9	3	1099	7	17317	0.007353
GO:0016486	peptide hormone processing	biological_process	8	3	1099	7	17317	0.007353
GO:0051256	mitotic spindle midzone assembly	biological_process	6	3	1099	7	17317	0.007353
GO:0097746	regulation of blood vessel diameter	biological_process	8	3	1099	7	17317	0.007353
GO:0031730	CCR5 chemokine receptor binding	molecular_function	9	3	1099	7	17317	0.007353
GO:0061370	testosterone biosynthetic process	biological_process	8	3	1099	7	17317	0.007353
GO:1903715	regulation of aerobic respiration	biological_process	9	3	1099	7	17317	0.007353
GO:0010838	positive regulation of keratinocyte proliferation	biological_process	9	3	1099	7	17317	0.007353
GO:0019563	glycerol catabolic process	biological_process	9	3	1099	7	17317	0.007353
GO:0071464	cellular response to hydrostatic pressure	biological_process	6	3	1099	7	17317	0.007353
GO:0010332	response to gamma radiation	biological_process	7	8	1099	46	17317	0.00774471
GO:0071392	cellular response to estradiol stimulus	biological_process	7	8	1099	46	17317	0.00774471
GO:0045595	regulation of cell differentiation	biological_process	6	7	1099	37	17317	0.0078244
GO:0016021	integral component of membrane	cellular_component	5	250	1099	3438	17317	0.00786905
GO:0045444	fat cell differentiation	biological_process	6	11	1099	76	17317	0.00822505
GO:0045776	negative regulation of blood pressure	biological_process	6	6	1099	29	17317	0.00867571
GO:0042246	tissue regeneration	biological_process	6	6	1099	29	17317	0.00867571
GO:0070330	aromatase activity	molecular_function	7	5	1099	21	17317	0.00883595
GO:0032733	positive regulation of interleukin-10 production	biological_process	8	5	1099	21	17317	0.00883595
GO:0071372	cellular response to follicle-stimulating hormone stimulus	biological_process	8	5	1099	21	17317	0.00883595
GO:0033138	positive regulation of peptidyl-serine phosphorylation	biological_process	11	11	1099	77	17317	0.00906135
GO:0007052	mitotic spindle organization	biological_process	9	7	1099	38	17317	0.00907809
GO:0048839	inner ear development	biological_process	5	9	1099	57	17317	0.0092517
GO:0031234	extrinsic component of cytoplasmic side of plasma membrane	cellular_component	6	10	1099	67	17317	0.00928431
GO:0010033	response to organic substance	biological_process	5	16	1099	132	17317	0.00946283
GO:0005819	spindle	cellular_component	6	12	1099	88	17317	0.00948549
GO:0004089	carbonate dehydratase activity	molecular_function	7	4	1099	14	17317	0.00966378
GO:0030673	axolemma	cellular_component	7	4	1099	14	17317	0.00966378
GO:0006171	cAMP biosynthetic process	biological_process	12	4	1099	14	17317	0.00966378
GO:0007494	midgut development	biological_process	7	4	1099	14	17317	0.00966378
GO:0009987	cellular process	biological_process	3	4	1099	14	17317	0.00966378
GO:0030500	regulation of bone mineralization	biological_process	7	4	1099	14	17317	0.00966378
GO:0006801	superoxide metabolic process	biological_process	6	4	1099	14	17317	0.00966378
GO:0042127	regulation of cell proliferation	biological_process	6	24	1099	227	17317	0.00978073
GO:0005829	cytosol	cellular_component	6	238	1099	3275	17317	0.0099064
GO:0048545	response to steroid hormone	biological_process	6	8	1099	48	17317	0.0100187
GO:0016324	apical plasma membrane	cellular_component	5	28	1099	277	17317	0.0100788
GO:0010165	response to X-ray	biological_process	7	6	1099	30	17317	0.0102752
GO:0032757	positive regulation of interleukin-8 production	biological_process	8	6	1099	30	17317	0.0102752
GO:0032967	positive regulation of collagen biosynthetic process	biological_process	8	6	1099	30	17317	0.0102752
GO:0050679	positive regulation of epithelial cell proliferation	biological_process	8	10	1099	68	17317	0.0102837
GO:0030335	positive regulation of cell migration	biological_process	8	22	1099	204	17317	0.0104551
GO:0043066	negative regulation of apoptotic process	biological_process	9	45	1099	498	17317	0.0106653
GO:0030215	semaphorin receptor binding	molecular_function	6	5	1099	22	17317	0.0108488
GO:0019369	arachidonic acid metabolic process	biological_process	11	5	1099	22	17317	0.0108488
GO:0010976	positive regulation of neuron projection development	biological_process	11	16	1099	134	17317	0.0108624
GO:0000064	L-ornithine transmembrane transporter activity	molecular_function	7	3	1099	8	17317	0.0112137
GO:0010642	negative regulation of platelet-derived growth factor receptor signaling pathway	biological_process	9	3	1099	8	17317	0.0112137
GO:0000779	condensed chromosome, centromeric region	cellular_component	8	3	1099	8	17317	0.0112137
GO:0071279	cellular response to cobalt ion	biological_process	8	3	1099	8	17317	0.0112137
GO:0031313	extrinsic component of endosome membrane	cellular_component	6	3	1099	8	17317	0.0112137
GO:0034080	CENP-A containing nucleosome assembly	biological_process	9	3	1099	8	17317	0.0112137
GO:0048406	nerve growth factor binding	molecular_function	7	3	1099	8	17317	0.0112137
GO:0019841	retinol binding	molecular_function	7	3	1099	8	17317	0.0112137
GO:0006110	regulation of glycolytic process	biological_process	10	3	1099	8	17317	0.0112137
GO:0032754	positive regulation of interleukin-5 production	biological_process	8	3	1099	8	17317	0.0112137
GO:0019674	NAD metabolic process	biological_process	4	3	1099	8	17317	0.0112137
GO:0009615	response to virus	biological_process	7	12	1099	90	17317	0.0112737
GO:0009409	response to cold	biological_process	5	8	1099	49	17317	0.0113255
GO:0051020	GTPase binding	molecular_function	6	8	1099	49	17317	0.0113255
GO:0006813	potassium ion transport	biological_process	9	9	1099	59	17317	0.0115465
GO:0097638	L-arginine import across plasma membrane	biological_process	13	2	1099	3	17317	0.0115627
GO:0051599	response to hydrostatic pressure	biological_process	5	2	1099	3	17317	0.0115627
GO:0002685	regulation of leukocyte migration	biological_process	6	2	1099	3	17317	0.0115627
GO:0101020	estrogen 16-alpha-hydroxylase activity	molecular_function	7	2	1099	3	17317	0.0115627
GO:0071288	cellular response to mercury ion	biological_process	8	2	1099	3	17317	0.0115627
GO:0034284	response to monosaccharide	biological_process	7	2	1099	3	17317	0.0115627
GO:0051461	positive regulation of corticotropin secretion	biological_process	7	2	1099	3	17317	0.0115627
GO:0051445	regulation of meiotic cell cycle	biological_process	7	2	1099	3	17317	0.0115627
GO:0030892	mitotic cohesin complex	cellular_component	5	2	1099	3	17317	0.0115627
GO:0097305	response to alcohol	biological_process	6	2	1099	3	17317	0.0115627
GO:0050427	3'-phosphoadenosine 5'-phosphosulfate metabolic process	biological_process	6	2	1099	3	17317	0.0115627
GO:0005608	laminin-3 complex	cellular_component	5	2	1099	3	17317	0.0115627
GO:0003093	regulation of glomerular filtration	biological_process	8	2	1099	3	17317	0.0115627
GO:2000660	negative regulation of interleukin-1-mediated signaling pathway	biological_process	10	2	1099	3	17317	0.0115627
GO:1990144	intrinsic apoptotic signaling pathway in response to hypoxia	biological_process	7	2	1099	3	17317	0.0115627
GO:0010573	vascular endothelial growth factor production	biological_process	5	2	1099	3	17317	0.0115627
GO:0035880	embryonic nail plate morphogenesis	biological_process	6	2	1099	3	17317	0.0115627
GO:2000194	regulation of female gonad development	biological_process	8	2	1099	3	17317	0.0115627
GO:0072012	glomerulus vasculature development	biological_process	6	2	1099	3	17317	0.0115627
GO:0097159	organic cyclic compound binding	molecular_function	4	2	1099	3	17317	0.0115627
GO:0070171	negative regulation of tooth mineralization	biological_process	10	2	1099	3	17317	0.0115627
GO:1900625	positive regulation of monocyte aggregation	biological_process	9	2	1099	3	17317	0.0115627
GO:0036156	inner dynein arm	cellular_component	7	2	1099	3	17317	0.0115627
GO:0070189	kynurenine metabolic process	biological_process	6	2	1099	3	17317	0.0115627
GO:0098910	regulation of atrial cardiac muscle cell action potential	biological_process	7	2	1099	3	17317	0.0115627
GO:0004994	somatostatin receptor activity	molecular_function	8	2	1099	3	17317	0.0115627
GO:0090074	negative regulation of protein homodimerization activity	biological_process	8	2	1099	3	17317	0.0115627
GO:0001869	negative regulation of complement activation, lectin pathway	biological_process	9	2	1099	3	17317	0.0115627
GO:2000860	positive regulation of aldosterone secretion	biological_process	12	2	1099	3	17317	0.0115627
GO:0001665	alpha-N-acetylgalactosaminide alpha-2,6-sialyltransferase activity	molecular_function	7	2	1099	3	17317	0.0115627
GO:0010866	regulation of triglyceride biosynthetic process	biological_process	8	2	1099	3	17317	0.0115627
GO:1990478	response to ultrasound	biological_process	6	2	1099	3	17317	0.0115627
GO:1901897	regulation of relaxation of cardiac muscle	biological_process	9	2	1099	3	17317	0.0115627
GO:0009624	response to nematode	biological_process	7	2	1099	3	17317	0.0115627
GO:0004698	calcium-dependent protein kinase C activity	molecular_function	10	2	1099	3	17317	0.0115627
GO:0090022	regulation of neutrophil chemotaxis	biological_process	9	2	1099	3	17317	0.0115627
GO:0048014	Tie signaling pathway	biological_process	8	2	1099	3	17317	0.0115627
GO:0008241	peptidyl-dipeptidase activity	molecular_function	8	2	1099	3	17317	0.0115627
GO:0038170	somatostatin signaling pathway	biological_process	6	2	1099	3	17317	0.0115627
GO:0032349	positive regulation of aldosterone biosynthetic process	biological_process	9	2	1099	3	17317	0.0115627
GO:0051100	negative regulation of binding	biological_process	6	2	1099	3	17317	0.0115627
GO:0015670	carbon dioxide transport	biological_process	7	2	1099	3	17317	0.0115627
GO:0006835	dicarboxylic acid transport	biological_process	10	2	1099	3	17317	0.0115627
GO:1901657	glycosyl compound metabolic process	biological_process	6	2	1099	3	17317	0.0115627
GO:0033512	L-lysine catabolic process to acetyl-CoA via saccharopine	biological_process	10	2	1099	3	17317	0.0115627
GO:0003161	cardiac conduction system development	biological_process	9	2	1099	3	17317	0.0115627
GO:0046483	heterocycle metabolic process	biological_process	5	2	1099	3	17317	0.0115627
GO:1903025	regulation of RNA polymerase II regulatory region sequence-specific DNA binding	biological_process	8	2	1099	3	17317	0.0115627
GO:0050746	regulation of lipoprotein metabolic process	biological_process	7	2	1099	3	17317	0.0115627
GO:0005975	carbohydrate metabolic process	biological_process	5	15	1099	124	17317	0.0119562
GO:0035023	regulation of Rho protein signal transduction	biological_process	11	11	1099	80	17317	0.0119675
GO:0001578	microtubule bundle formation	biological_process	8	6	1099	31	17317	0.0120732
GO:0048863	stem cell differentiation	biological_process	6	6	1099	31	17317	0.0120732
GO:0005215	transporter activity	molecular_function	3	10	1099	70	17317	0.0125255
GO:0051099	positive regulation of binding	biological_process	6	4	1099	15	17317	0.0125264
GO:0004016	adenylate cyclase activity	molecular_function	5	4	1099	15	17317	0.0125264
GO:0086004	regulation of cardiac muscle cell contraction	biological_process	11	4	1099	15	17317	0.0125264
GO:0009897	external side of plasma membrane	cellular_component	5	24	1099	232	17317	0.0125812
GO:0010906	regulation of glucose metabolic process	biological_process	9	5	1099	23	17317	0.0131533
GO:0014850	response to muscle activity	biological_process	5	5	1099	23	17317	0.0131533
GO:0030325	adrenal gland development	biological_process	7	5	1099	23	17317	0.0131533
GO:0030425	dendrite	cellular_component	6	39	1099	425	17317	0.013201
GO:0010811	positive regulation of cell-substrate adhesion	biological_process	7	7	1099	41	17317	0.0137186
GO:0030097	hemopoiesis	biological_process	7	10	1099	71	17317	0.0137755
GO:0060070	canonical Wnt signaling pathway	biological_process	8	10	1099	71	17317	0.0137755
GO:0030282	bone mineralization	biological_process	7	6	1099	32	17317	0.0140814
GO:0003333	amino acid transmembrane transport	biological_process	11	6	1099	32	17317	0.0140814
GO:0030496	midbody	cellular_component	4	16	1099	138	17317	0.0141481
GO:0071300	cellular response to retinoic acid	biological_process	7	9	1099	61	17317	0.0142417
GO:0034765	regulation of ion transmembrane transport	biological_process	8	11	1099	82	17317	0.0142668
GO:0030334	regulation of cell migration	biological_process	7	11	1099	82	17317	0.0142668
GO:0001503	ossification	biological_process	4	11	1099	82	17317	0.0142668
GO:0016477	cell migration	biological_process	6	22	1099	211	17317	0.0150693
GO:0005813	centrosome	cellular_component	7	43	1099	482	17317	0.0151228
GO:0030018	Z disc	cellular_component	5	14	1099	116	17317	0.0151294
GO:0045766	positive regulation of angiogenesis	biological_process	8	14	1099	116	17317	0.0151294
GO:0045944	positive regulation of transcription by RNA polymerase II	biological_process	10	79	1099	978	17317	0.0154558
GO:0006879	cellular iron ion homeostasis	biological_process	12	7	1099	42	17317	0.015586
GO:0043434	response to peptide hormone	biological_process	6	12	1099	94	17317	0.0156177
GO:0030198	extracellular matrix organization	biological_process	6	12	1099	94	17317	0.0156177
GO:0033280	response to vitamin D	biological_process	7	5	1099	24	17317	0.0157664
GO:0008045	motor neuron axon guidance	biological_process	7	5	1099	24	17317	0.0157664
GO:0071498	cellular response to fluid shear stress	biological_process	6	4	1099	16	17317	0.0158782
GO:0003351	epithelial cilium movement	biological_process	7	4	1099	16	17317	0.0158782
GO:0035729	cellular response to hepatocyte growth factor stimulus	biological_process	8	4	1099	16	17317	0.0158782
GO:0004435	phosphatidylinositol phospholipase C activity	molecular_function	9	4	1099	16	17317	0.0158782
GO:0009635	response to herbicide	biological_process	5	4	1099	16	17317	0.0158782
GO:0060236	regulation of mitotic spindle organization	biological_process	8	4	1099	16	17317	0.0158782
GO:0048245	eosinophil chemotaxis	biological_process	7	4	1099	16	17317	0.0158782
GO:0014075	response to amine	biological_process	7	4	1099	16	17317	0.0158782
GO:0030315	T-tubule	cellular_component	5	8	1099	52	17317	0.0159991
GO:0045785	positive regulation of cell adhesion	biological_process	6	8	1099	52	17317	0.0159991
GO:0050665	hydrogen peroxide biosynthetic process	biological_process	8	3	1099	9	17317	0.0160353
GO:0018894	dibenzo-p-dioxin metabolic process	biological_process	6	3	1099	9	17317	0.0160353
GO:0019934	cGMP-mediated signaling	biological_process	8	3	1099	9	17317	0.0160353
GO:0090197	positive regulation of chemokine secretion	biological_process	9	3	1099	9	17317	0.0160353
GO:0002544	chronic inflammatory response	biological_process	7	3	1099	9	17317	0.0160353
GO:0031994	insulin-like growth factor I binding	molecular_function	7	3	1099	9	17317	0.0160353
GO:0048672	positive regulation of collateral sprouting	biological_process	8	3	1099	9	17317	0.0160353
GO:0060452	positive regulation of cardiac muscle contraction	biological_process	10	3	1099	9	17317	0.0160353
GO:0002087	regulation of respiratory gaseous exchange by neurological system process	biological_process	8	3	1099	9	17317	0.0160353
GO:0061621	canonical glycolysis	biological_process	6	3	1099	9	17317	0.0160353
GO:0009266	response to temperature stimulus	biological_process	5	3	1099	9	17317	0.0160353
GO:0051315	attachment of mitotic spindle microtubules to kinetochore	biological_process	6	3	1099	9	17317	0.0160353
GO:0030056	hemidesmosome	cellular_component	5	3	1099	9	17317	0.0160353
GO:0008219	cell death	biological_process	4	6	1099	33	17317	0.016311
GO:0045211	postsynaptic membrane	cellular_component	5	18	1099	164	17317	0.0163633
GO:0005089	Rho guanyl-nucleotide exchange factor activity	molecular_function	9	9	1099	63	17317	0.0173751
GO:0010595	positive regulation of endothelial cell migration	biological_process	10	7	1099	43	17317	0.017627
GO:0035914	skeletal muscle cell differentiation	biological_process	6	7	1099	43	17317	0.017627
GO:0032720	negative regulation of tumor necrosis factor production	biological_process	9	7	1099	43	17317	0.017627
GO:0031090	organelle membrane	cellular_component	4	8	1099	53	17317	0.0178279
GO:0045666	positive regulation of neuron differentiation	biological_process	10	11	1099	85	17317	0.0183203
GO:0048015	phosphatidylinositol-mediated signaling	biological_process	7	5	1099	25	17317	0.0187039
GO:0043278	response to morphine	biological_process	6	6	1099	34	17317	0.0187726
GO:0007193	adenylate cyclase-inhibiting G-protein coupled receptor signaling pathway	biological_process	8	6	1099	34	17317	0.0187726
GO:0001755	neural crest cell migration	biological_process	8	6	1099	34	17317	0.0187726
GO:0070371	ERK1 and ERK2 cascade	biological_process	12	6	1099	34	17317	0.0187726
GO:0034612	response to tumor necrosis factor	biological_process	7	6	1099	34	17317	0.0187726
GO:0030336	negative regulation of cell migration	biological_process	8	12	1099	97	17317	0.0196283
GO:0018243	protein O-linked glycosylation via threonine	biological_process	11	4	1099	17	17317	0.0197423
GO:0021591	ventricular system development	biological_process	6	4	1099	17	17317	0.0197423
GO:2001224	positive regulation of neuron migration	biological_process	9	4	1099	17	17317	0.0197423
GO:0099738	cell cortex region	cellular_component	8	4	1099	17	17317	0.0197423
GO:0004653	polypeptide N-acetylgalactosaminyltransferase activity	molecular_function	8	4	1099	17	17317	0.0197423
GO:0030728	ovulation	biological_process	5	4	1099	17	17317	0.0197423
GO:0001556	oocyte maturation	biological_process	5	4	1099	17	17317	0.0197423
GO:0031000	response to caffeine	biological_process	6	4	1099	17	17317	0.0197423
GO:0031402	sodium ion binding	molecular_function	8	4	1099	17	17317	0.0197423
GO:0006182	cGMP biosynthetic process	biological_process	12	4	1099	17	17317	0.0197423
GO:0018149	peptide cross-linking	biological_process	9	4	1099	17	17317	0.0197423
GO:0030955	potassium ion binding	molecular_function	8	4	1099	17	17317	0.0197423
GO:0043034	costamere	cellular_component	5	4	1099	17	17317	0.0197423
GO:0006508	proteolysis	biological_process	7	33	1099	358	17317	0.0201076
GO:0001558	regulation of cell growth	biological_process	6	9	1099	65	17317	0.0209832
GO:0004867	serine-type endopeptidase inhibitor activity	molecular_function	8	9	1099	65	17317	0.0209832
GO:0007409	axonogenesis	biological_process	9	12	1099	98	17317	0.0211222
GO:0055093	response to hyperoxia	biological_process	5	6	1099	35	17317	0.0214761
GO:0042535	positive regulation of tumor necrosis factor biosynthetic process	biological_process	10	3	1099	10	17317	0.0218421
GO:0006699	bile acid biosynthetic process	biological_process	8	3	1099	10	17317	0.0218421
GO:0002237	response to molecule of bacterial origin	biological_process	6	3	1099	10	17317	0.0218421
GO:0045730	respiratory burst	biological_process	4	3	1099	10	17317	0.0218421
GO:0030071	regulation of mitotic metaphase/anaphase transition	biological_process	11	3	1099	10	17317	0.0218421
GO:0060740	prostate gland epithelium morphogenesis	biological_process	7	3	1099	10	17317	0.0218421
GO:0001533	cornified envelope	cellular_component	5	3	1099	10	17317	0.0218421
GO:0001523	retinoid metabolic process	biological_process	10	3	1099	10	17317	0.0218421
GO:0030296	protein tyrosine kinase activator activity	molecular_function	8	3	1099	10	17317	0.0218421
GO:0009404	toxin metabolic process	biological_process	5	3	1099	10	17317	0.0218421
GO:0033173	calcineurin-NFAT signaling cascade	biological_process	8	3	1099	10	17317	0.0218421
GO:0004114	3',5'-cyclic-nucleotide phosphodiesterase activity	molecular_function	9	3	1099	10	17317	0.0218421
GO:0002446	neutrophil mediated immunity	biological_process	7	3	1099	10	17317	0.0218421
GO:0043568	positive regulation of insulin-like growth factor receptor signaling pathway	biological_process	9	3	1099	10	17317	0.0218421
GO:0008354	germ cell migration	biological_process	7	3	1099	10	17317	0.0218421
GO:0043279	response to alkaloid	biological_process	7	3	1099	10	17317	0.0218421
GO:0001823	mesonephros development	biological_process	7	3	1099	10	17317	0.0218421
GO:0010760	negative regulation of macrophage chemotaxis	biological_process	9	3	1099	10	17317	0.0218421
GO:0007202	activation of phospholipase C activity	biological_process	11	3	1099	10	17317	0.0218421
GO:0008217	regulation of blood pressure	biological_process	5	8	1099	55	17317	0.0219266
GO:0001975	response to amphetamine	biological_process	6	5	1099	26	17317	0.0219796
GO:0097431	mitotic spindle pole	cellular_component	7	5	1099	26	17317	0.0219796
GO:0048752	semicircular canal morphogenesis	biological_process	6	2	1099	4	17317	0.022154
GO:0038132	neuregulin binding	molecular_function	6	2	1099	4	17317	0.022154
GO:0045627	positive regulation of T-helper 1 cell differentiation	biological_process	11	2	1099	4	17317	0.022154
GO:0021545	cranial nerve development	biological_process	6	2	1099	4	17317	0.022154
GO:0002933	lipid hydroxylation	biological_process	8	2	1099	4	17317	0.022154
GO:0098904	regulation of AV node cell action potential	biological_process	7	2	1099	4	17317	0.022154
GO:0070543	response to linoleic acid	biological_process	7	2	1099	4	17317	0.022154
GO:0071499	cellular response to laminar fluid shear stress	biological_process	7	2	1099	4	17317	0.022154
GO:0035879	plasma membrane lactate transport	biological_process	13	2	1099	4	17317	0.022154
GO:1903243	negative regulation of cardiac muscle hypertrophy in response to stress	biological_process	11	2	1099	4	17317	0.022154
GO:0045103	intermediate filament-based process	biological_process	4	2	1099	4	17317	0.022154
GO:0097052	L-kynurenine metabolic process	biological_process	7	2	1099	4	17317	0.022154
GO:0035173	histone kinase activity	molecular_function	8	2	1099	4	17317	0.022154
GO:0018119	peptidyl-cysteine S-nitrosylation	biological_process	10	2	1099	4	17317	0.022154
GO:0071242	cellular response to ammonium ion	biological_process	7	2	1099	4	17317	0.022154
GO:0019959	interleukin-8 binding	molecular_function	8	2	1099	4	17317	0.022154
GO:0010046	response to mycotoxin	biological_process	6	2	1099	4	17317	0.022154
GO:1990948	ubiquitin ligase inhibitor activity	molecular_function	7	2	1099	4	17317	0.022154
GO:0097411	hypoxia-inducible factor-1alpha signaling pathway	biological_process	5	2	1099	4	17317	0.022154
GO:2001054	negative regulation of mesenchymal cell apoptotic process	biological_process	10	2	1099	4	17317	0.022154
GO:0004740	pyruvate dehydrogenase (acetyl-transferring) kinase activity	molecular_function	8	2	1099	4	17317	0.022154
GO:0042567	insulin-like growth factor ternary complex	cellular_component	6	2	1099	4	17317	0.022154
GO:0002830	positive regulation of type 2 immune response	biological_process	8	2	1099	4	17317	0.022154
GO:0035356	cellular triglyceride homeostasis	biological_process	6	2	1099	4	17317	0.022154
GO:0045188	regulation of circadian sleep/wake cycle, non-REM sleep	biological_process	8	2	1099	4	17317	0.022154
GO:0022029	telencephalon cell migration	biological_process	8	2	1099	4	17317	0.022154
GO:0031262	Ndc80 complex	cellular_component	4	2	1099	4	17317	0.022154
GO:0010037	response to carbon dioxide	biological_process	6	2	1099	4	17317	0.022154
GO:0010883	regulation of lipid storage	biological_process	5	2	1099	4	17317	0.022154
GO:1903026	negative regulation of RNA polymerase II regulatory region sequence-specific DNA binding	biological_process	9	2	1099	4	17317	0.022154
GO:0071621	granulocyte chemotaxis	biological_process	6	2	1099	4	17317	0.022154
GO:0051048	negative regulation of secretion	biological_process	8	2	1099	4	17317	0.022154
GO:0010644	cell communication by electrical coupling	biological_process	5	2	1099	4	17317	0.022154
GO:0014904	myotube cell development	biological_process	8	2	1099	4	17317	0.022154
GO:0002674	negative regulation of acute inflammatory response	biological_process	10	2	1099	4	17317	0.022154
GO:0030104	water homeostasis	biological_process	7	2	1099	4	17317	0.022154
GO:0002079	inner acrosomal membrane	cellular_component	7	2	1099	4	17317	0.022154
GO:0070051	fibrinogen binding	molecular_function	5	2	1099	4	17317	0.022154
GO:0032675	regulation of interleukin-6 production	biological_process	7	2	1099	4	17317	0.022154
GO:0048050	post-embryonic eye morphogenesis	biological_process	7	2	1099	4	17317	0.022154
GO:0010594	regulation of endothelial cell migration	biological_process	9	2	1099	4	17317	0.022154
GO:0008422	beta-glucosidase activity	molecular_function	8	2	1099	4	17317	0.022154
GO:0070401	NADP+ binding	molecular_function	6	2	1099	4	17317	0.022154
GO:0071864	positive regulation of cell proliferation in bone marrow	biological_process	8	2	1099	4	17317	0.022154
GO:0003839	gamma-glutamylcyclotransferase activity	molecular_function	7	2	1099	4	17317	0.022154
GO:0045098	type III intermediate filament	cellular_component	8	2	1099	4	17317	0.022154
GO:0031543	peptidyl-proline dioxygenase activity	molecular_function	7	2	1099	4	17317	0.022154
GO:0030492	hemoglobin binding	molecular_function	5	2	1099	4	17317	0.022154
GO:1903779	regulation of cardiac conduction	biological_process	9	2	1099	4	17317	0.022154
GO:0051987	positive regulation of attachment of spindle microtubules to kinetochore	biological_process	8	2	1099	4	17317	0.022154
GO:0010510	regulation of acetyl-CoA biosynthetic process from pyruvate	biological_process	10	2	1099	4	17317	0.022154
GO:0045919	positive regulation of cytolysis	biological_process	7	2	1099	4	17317	0.022154
GO:0071460	cellular response to cell-matrix adhesion	biological_process	6	2	1099	4	17317	0.022154
GO:0015889	cobalamin transport	biological_process	7	2	1099	4	17317	0.022154
GO:0000942	condensed nuclear chromosome outer kinetochore	cellular_component	5	2	1099	4	17317	0.022154
GO:0019722	calcium-mediated signaling	biological_process	7	7	1099	45	17317	0.0222592
GO:0030971	receptor tyrosine kinase binding	molecular_function	6	7	1099	45	17317	0.0222592
GO:0042632	cholesterol homeostasis	biological_process	9	9	1099	66	17317	0.0229762
GO:0005248	voltage-gated sodium channel activity	molecular_function	9	4	1099	18	17317	0.0241376
GO:0030414	peptidase inhibitor activity	molecular_function	6	4	1099	18	17317	0.0241376
GO:0018242	protein O-linked glycosylation via serine	biological_process	11	4	1099	18	17317	0.0241376
GO:0050966	detection of mechanical stimulus involved in sensory perception of pain	biological_process	7	4	1099	18	17317	0.0241376
GO:0044255	cellular lipid metabolic process	biological_process	6	4	1099	18	17317	0.0241376
GO:0050965	detection of temperature stimulus involved in sensory perception of pain	biological_process	8	4	1099	18	17317	0.0241376
GO:0070555	response to interleukin-1	biological_process	7	6	1099	36	17317	0.0244307
GO:0032154	cleavage furrow	cellular_component	5	7	1099	46	17317	0.0248644
GO:0071310	cellular response to organic substance	biological_process	6	7	1099	46	17317	0.0248644
GO:0042752	regulation of circadian rhythm	biological_process	5	7	1099	46	17317	0.0248644
GO:0031225	anchored component of membrane	cellular_component	5	7	1099	46	17317	0.0248644
GO:0051301	cell division	biological_process	4	21	1099	209	17317	0.0249432
GO:0005102	receptor binding	molecular_function	5	32	1099	351	17317	0.0250473
GO:0036120	cellular response to platelet-derived growth factor stimulus	biological_process	6	5	1099	27	17317	0.0256059
GO:0009312	oligosaccharide biosynthetic process	biological_process	7	5	1099	27	17317	0.0256059
GO:0097110	scaffold protein binding	molecular_function	5	8	1099	57	17317	0.026649
GO:0007596	blood coagulation	biological_process	7	8	1099	57	17317	0.026649
GO:0014068	positive regulation of phosphatidylinositol 3-kinase signaling	biological_process	10	8	1099	57	17317	0.026649
GO:0005737	cytoplasm	cellular_component	5	334	1099	4815	17317	0.0267541
GO:0007080	mitotic metaphase plate congression	biological_process	9	6	1099	37	17317	0.0276449
GO:0005547	phosphatidylinositol-3,4,5-trisphosphate binding	molecular_function	8	6	1099	37	17317	0.0276449
GO:0048147	negative regulation of fibroblast proliferation	biological_process	8	6	1099	37	17317	0.0276449
GO:1903561	extracellular vesicle	cellular_component	6	6	1099	37	17317	0.0276449
GO:0000015	phosphopyruvate hydratase complex	cellular_component	7	3	1099	11	17317	0.0286408
GO:0042118	endothelial cell activation	biological_process	5	3	1099	11	17317	0.0286408
GO:0045591	positive regulation of regulatory T cell differentiation	biological_process	11	3	1099	11	17317	0.0286408
GO:0031424	keratinization	biological_process	4	3	1099	11	17317	0.0286408
GO:1900744	regulation of p38MAPK cascade	biological_process	12	3	1099	11	17317	0.0286408
GO:0046632	alpha-beta T cell differentiation	biological_process	9	3	1099	11	17317	0.0286408
GO:0030212	hyaluronan metabolic process	biological_process	8	3	1099	11	17317	0.0286408
GO:0045577	regulation of B cell differentiation	biological_process	9	3	1099	11	17317	0.0286408
GO:0071374	cellular response to parathyroid hormone stimulus	biological_process	7	3	1099	11	17317	0.0286408
GO:0009100	glycoprotein metabolic process	biological_process	7	3	1099	11	17317	0.0286408
GO:0004634	phosphopyruvate hydratase activity	molecular_function	7	3	1099	11	17317	0.0286408
GO:0034663	endoplasmic reticulum chaperone complex	cellular_component	4	3	1099	11	17317	0.0286408
GO:0005604	basement membrane	cellular_component	6	11	1099	91	17317	0.0289
GO:0043403	skeletal muscle tissue regeneration	biological_process	7	4	1099	19	17317	0.029078
GO:0044291	cell-cell contact zone	cellular_component	5	4	1099	19	17317	0.029078
GO:0005539	glycosaminoglycan binding	molecular_function	5	4	1099	19	17317	0.029078
GO:0007187	G-protein coupled receptor signaling pathway, coupled to cyclic nucleotide second messenger	biological_process	6	4	1099	19	17317	0.029078
GO:0046685	response to arsenic-containing substance	biological_process	5	4	1099	19	17317	0.029078
GO:0016706	oxidoreductase activity, acting on paired donors, with incorporation or reduction of molecular oxygen, 2-oxoglutarate as one donor, and incorporation of one atom each of oxygen into both donors	molecular_function	6	4	1099	19	17317	0.029078
GO:0048513	animal organ development	biological_process	5	4	1099	19	17317	0.029078
GO:0071944	cell periphery	cellular_component	4	8	1099	58	17317	0.0292567
GO:0002027	regulation of heart rate	biological_process	9	5	1099	28	17317	0.0295936
GO:0043015	gamma-tubulin binding	molecular_function	7	5	1099	28	17317	0.0295936
GO:2000352	negative regulation of endothelial cell apoptotic process	biological_process	11	5	1099	28	17317	0.0295936
GO:0042572	retinol metabolic process	biological_process	11	5	1099	28	17317	0.0295936
GO:0001227	transcriptional repressor activity, RNA polymerase II transcription regulatory region sequence-specific DNA binding	molecular_function	6	9	1099	69	17317	0.0297607
GO:0007267	cell-cell signaling	biological_process	5	13	1099	115	17317	0.0304241
GO:0043200	response to amino acid	biological_process	6	7	1099	48	17317	0.0306847
GO:0045600	positive regulation of fat cell differentiation	biological_process	8	7	1099	48	17317	0.0306847
GO:0009925	basal plasma membrane	cellular_component	5	6	1099	38	17317	0.0311261
GO:1904115	axon cytoplasm	cellular_component	6	6	1099	38	17317	0.0311261
GO:0002020	protease binding	molecular_function	6	12	1099	104	17317	0.0319048
GO:0043408	regulation of MAPK cascade	biological_process	10	8	1099	59	17317	0.0320347
GO:0019233	sensory perception of pain	biological_process	7	8	1099	59	17317	0.0320347
GO:0006979	response to oxidative stress	biological_process	5	15	1099	140	17317	0.0323213
GO:0008076	voltage-gated potassium channel complex	cellular_component	9	7	1099	49	17317	0.0339113
GO:0015914	phospholipid transport	biological_process	8	5	1099	29	17317	0.0339515
GO:0043392	negative regulation of DNA binding	biological_process	7	5	1099	29	17317	0.0339515
GO:0005719	nuclear euchromatin	cellular_component	8	5	1099	29	17317	0.0339515
GO:0045765	regulation of angiogenesis	biological_process	7	5	1099	29	17317	0.0339515
GO:0051924	regulation of calcium ion transport	biological_process	9	5	1099	29	17317	0.0339515
GO:0043410	positive regulation of MAPK cascade	biological_process	11	15	1099	141	17317	0.0341353
GO:0044458	motile cilium assembly	biological_process	8	4	1099	20	17317	0.0345734
GO:0042738	exogenous drug catabolic process	biological_process	7	4	1099	20	17317	0.0345734
GO:0010821	regulation of mitochondrion organization	biological_process	8	4	1099	20	17317	0.0345734
GO:0006952	defense response	biological_process	5	6	1099	39	17317	0.0348813
GO:0005160	transforming growth factor beta receptor binding	molecular_function	7	6	1099	39	17317	0.0348813
GO:0005337	nucleoside transmembrane transporter activity	molecular_function	6	2	1099	5	17317	0.0353809
GO:0070891	lipoteichoic acid binding	molecular_function	5	2	1099	5	17317	0.0353809
GO:0031404	chloride ion binding	molecular_function	6	2	1099	5	17317	0.0353809
GO:0002374	cytokine secretion involved in immune response	biological_process	12	2	1099	5	17317	0.0353809
GO:1905832	positive regulation of spindle assembly	biological_process	10	2	1099	5	17317	0.0353809
GO:0042168	heme metabolic process	biological_process	8	2	1099	5	17317	0.0353809
GO:0046813	receptor-mediated virion attachment to host cell	biological_process	7	2	1099	5	17317	0.0353809
GO:0060385	axonogenesis involved in innervation	biological_process	10	2	1099	5	17317	0.0353809
GO:0072719	cellular response to cisplatin	biological_process	7	2	1099	5	17317	0.0353809
GO:0020005	symbiont-containing vacuole membrane	cellular_component	5	2	1099	5	17317	0.0353809
GO:0015181	arginine transmembrane transporter activity	molecular_function	7	2	1099	5	17317	0.0353809
GO:0015809	arginine transport	biological_process	8	2	1099	5	17317	0.0353809
GO:0004528	phosphodiesterase I activity	molecular_function	8	2	1099	5	17317	0.0353809
GO:0005499	vitamin D binding	molecular_function	6	2	1099	5	17317	0.0353809
GO:0035694	mitochondrial protein catabolic process	biological_process	9	2	1099	5	17317	0.0353809
GO:0035754	B cell chemotaxis	biological_process	7	2	1099	5	17317	0.0353809
GO:0045916	negative regulation of complement activation	biological_process	8	2	1099	5	17317	0.0353809
GO:0002081	outer acrosomal membrane	cellular_component	7	2	1099	5	17317	0.0353809
GO:0019834	phospholipase A2 inhibitor activity	molecular_function	8	2	1099	5	17317	0.0353809
GO:0016212	kynurenine-oxoglutarate transaminase activity	molecular_function	8	2	1099	5	17317	0.0353809
GO:0046605	regulation of centrosome cycle	biological_process	8	2	1099	5	17317	0.0353809
GO:0004031	aldehyde oxidase activity	molecular_function	7	2	1099	5	17317	0.0353809
GO:0014063	negative regulation of serotonin secretion	biological_process	9	2	1099	5	17317	0.0353809
GO:0003006	developmental process involved in reproduction	biological_process	4	2	1099	5	17317	0.0353809
GO:1903826	arginine transmembrane transport	biological_process	9	2	1099	5	17317	0.0353809
GO:0000052	citrulline metabolic process	biological_process	10	2	1099	5	17317	0.0353809
GO:0003847	1-alkyl-2-acetylglycerophosphocholine esterase activity	molecular_function	7	2	1099	5	17317	0.0353809
GO:0120009	intermembrane lipid transfer	biological_process	8	2	1099	5	17317	0.0353809
GO:0004614	phosphoglucomutase activity	molecular_function	7	2	1099	5	17317	0.0353809
GO:0051294	establishment of spindle orientation	biological_process	9	2	1099	5	17317	0.0353809
GO:0051101	regulation of DNA binding	biological_process	6	2	1099	5	17317	0.0353809
GO:0004022	alcohol dehydrogenase (NAD) activity	molecular_function	7	2	1099	5	17317	0.0353809
GO:0046578	regulation of Ras protein signal transduction	biological_process	10	2	1099	5	17317	0.0353809
GO:0033625	positive regulation of integrin activation	biological_process	8	2	1099	5	17317	0.0353809
GO:0060087	relaxation of vascular smooth muscle	biological_process	8	2	1099	5	17317	0.0353809
GO:0015129	lactate transmembrane transporter activity	molecular_function	8	2	1099	5	17317	0.0353809
GO:0031401	positive regulation of protein modification process	biological_process	9	2	1099	5	17317	0.0353809
GO:0015189	L-lysine transmembrane transporter activity	molecular_function	7	2	1099	5	17317	0.0353809
GO:0001517	N-acetylglucosamine 6-O-sulfotransferase activity	molecular_function	7	2	1099	5	17317	0.0353809
GO:0032782	bile acid secretion	biological_process	11	2	1099	5	17317	0.0353809
GO:0045823	positive regulation of heart contraction	biological_process	9	2	1099	5	17317	0.0353809
GO:0008063	Toll signaling pathway	biological_process	6	2	1099	5	17317	0.0353809
GO:0051661	maintenance of centrosome location	biological_process	7	2	1099	5	17317	0.0353809
GO:0045629	negative regulation of T-helper 2 cell differentiation	biological_process	9	2	1099	5	17317	0.0353809
GO:2000553	positive regulation of T-helper 2 cell cytokine production	biological_process	12	2	1099	5	17317	0.0353809
GO:0008294	calcium- and calmodulin-responsive adenylate cyclase activity	molecular_function	6	2	1099	5	17317	0.0353809
GO:0051450	myoblast proliferation	biological_process	4	2	1099	5	17317	0.0353809
GO:0042737	drug catabolic process	biological_process	6	2	1099	5	17317	0.0353809
GO:0033005	positive regulation of mast cell activation	biological_process	8	2	1099	5	17317	0.0353809
GO:0070061	fructose binding	molecular_function	6	2	1099	5	17317	0.0353809
GO:0033141	positive regulation of peptidyl-serine phosphorylation of STAT protein	biological_process	12	2	1099	5	17317	0.0353809
GO:0045143	homologous chromosome segregation	biological_process	7	2	1099	5	17317	0.0353809
GO:0070295	renal water absorption	biological_process	7	2	1099	5	17317	0.0353809
GO:0035976	transcription factor AP-1 complex	cellular_component	7	2	1099	5	17317	0.0353809
GO:0120013	intermembrane lipid transfer activity	molecular_function	4	2	1099	5	17317	0.0353809
GO:0060666	dichotomous subdivision of terminal units involved in salivary gland branching	biological_process	8	2	1099	5	17317	0.0353809
GO:0018958	phenol-containing compound metabolic process	biological_process	6	2	1099	5	17317	0.0353809
GO:0016868	intramolecular transferase activity, phosphotransferases	molecular_function	6	2	1099	5	17317	0.0353809
GO:1902109	negative regulation of mitochondrial membrane permeability involved in apoptotic process	biological_process	10	2	1099	5	17317	0.0353809
GO:0070938	contractile ring	cellular_component	4	2	1099	5	17317	0.0353809
GO:2000969	positive regulation of AMPA receptor activity	biological_process	10	2	1099	5	17317	0.0353809
GO:0002439	chronic inflammatory response to antigenic stimulus	biological_process	8	2	1099	5	17317	0.0353809
GO:0061673	mitotic spindle astral microtubule	cellular_component	10	2	1099	5	17317	0.0353809
GO:0032613	interleukin-10 production	biological_process	5	2	1099	5	17317	0.0353809
GO:0031545	peptidyl-proline 4-dioxygenase activity	molecular_function	8	2	1099	5	17317	0.0353809
GO:1990402	embryonic liver development	biological_process	7	2	1099	5	17317	0.0353809
GO:0044806	G-quadruplex DNA unwinding	biological_process	9	2	1099	5	17317	0.0353809
GO:0004784	superoxide dismutase activity	molecular_function	4	2	1099	5	17317	0.0353809
GO:0010822	positive regulation of mitochondrion organization	biological_process	9	2	1099	5	17317	0.0353809
GO:0043567	regulation of insulin-like growth factor receptor signaling pathway	biological_process	8	2	1099	5	17317	0.0353809
GO:0034553	mitochondrial respiratory chain complex II assembly	biological_process	9	2	1099	5	17317	0.0353809
GO:0048639	positive regulation of developmental growth	biological_process	7	2	1099	5	17317	0.0353809
GO:0044070	regulation of anion transport	biological_process	8	2	1099	5	17317	0.0353809
GO:0045155	electron transporter, transferring electrons from CoQH2-cytochrome c reductase complex and cytochrome c oxidase complex activity	molecular_function	6	2	1099	5	17317	0.0353809
GO:1900015	regulation of cytokine production involved in inflammatory response	biological_process	7	2	1099	5	17317	0.0353809
GO:0045995	regulation of embryonic development	biological_process	7	3	1099	12	17317	0.0364241
GO:0071223	cellular response to lipoteichoic acid	biological_process	8	3	1099	12	17317	0.0364241
GO:0090050	positive regulation of cell migration involved in sprouting angiogenesis	biological_process	12	3	1099	12	17317	0.0364241
GO:0010756	positive regulation of plasminogen activation	biological_process	11	3	1099	12	17317	0.0364241
GO:1904322	cellular response to forskolin	biological_process	7	3	1099	12	17317	0.0364241
GO:0050732	negative regulation of peptidyl-tyrosine phosphorylation	biological_process	11	3	1099	12	17317	0.0364241
GO:0006198	cAMP catabolic process	biological_process	12	3	1099	12	17317	0.0364241
GO:1904706	negative regulation of vascular smooth muscle cell proliferation	biological_process	9	3	1099	12	17317	0.0364241
GO:0045721	negative regulation of gluconeogenesis	biological_process	11	3	1099	12	17317	0.0364241
GO:0061158	3'-UTR-mediated mRNA destabilization	biological_process	12	3	1099	12	17317	0.0364241
GO:0002438	acute inflammatory response to antigenic stimulus	biological_process	8	3	1099	12	17317	0.0364241
GO:0051693	actin filament capping	biological_process	10	3	1099	12	17317	0.0364241
GO:0043117	positive regulation of vascular permeability	biological_process	8	3	1099	12	17317	0.0364241
GO:0043116	negative regulation of vascular permeability	biological_process	8	3	1099	12	17317	0.0364241
GO:0016491	oxidoreductase activity	molecular_function	4	17	1099	167	17317	0.0365457
GO:0007229	integrin-mediated signaling pathway	biological_process	6	10	1099	83	17317	0.0369011
GO:0019901	protein kinase binding	molecular_function	7	38	1099	444	17317	0.0372824
GO:0005581	collagen trimer	cellular_component	4	7	1099	50	17317	0.0373555
GO:0060326	cell chemotaxis	biological_process	6	7	1099	50	17317	0.0373555
GO:0035556	intracellular signal transduction	biological_process	5	34	1099	390	17317	0.0375864
GO:0043525	positive regulation of neuron apoptotic process	biological_process	10	8	1099	61	17317	0.0381189
GO:0005902	microvillus	cellular_component	7	8	1099	61	17317	0.0381189
GO:0043025	neuronal cell body	cellular_component	5	41	1099	486	17317	0.0382975
GO:0051281	positive regulation of release of sequestered calcium ion into cytosol	biological_process	15	5	1099	30	17317	0.0386867
GO:0046326	positive regulation of glucose import	biological_process	10	5	1099	30	17317	0.0386867
GO:0061098	positive regulation of protein tyrosine kinase activity	biological_process	12	5	1099	30	17317	0.0386867
GO:0048709	oligodendrocyte differentiation	biological_process	7	5	1099	30	17317	0.0386867
GO:0014069	postsynaptic density	cellular_component	5	22	1099	232	17317	0.0388945
GO:0042981	regulation of apoptotic process	biological_process	8	22	1099	232	17317	0.0388945
GO:0043407	negative regulation of MAP kinase activity	biological_process	12	6	1099	40	17317	0.0389162
GO:0043531	ADP binding	molecular_function	9	6	1099	40	17317	0.0389162
GO:0001974	blood vessel remodeling	biological_process	5	6	1099	40	17317	0.0389162
GO:0043124	negative regulation of I-kappaB kinase/NF-kappaB signaling	biological_process	10	6	1099	40	17317	0.0389162
GO:0045429	positive regulation of nitric oxide biosynthetic process	biological_process	9	6	1099	40	17317	0.0389162
GO:0035371	microtubule plus-end	cellular_component	7	4	1099	21	17317	0.0406292
GO:0097440	apical dendrite	cellular_component	7	4	1099	21	17317	0.0406292
GO:0004866	endopeptidase inhibitor activity	molecular_function	7	4	1099	21	17317	0.0406292
GO:0008106	alcohol dehydrogenase (NADP+) activity	molecular_function	8	4	1099	21	17317	0.0406292
GO:0016266	O-glycan processing	biological_process	11	4	1099	21	17317	0.0406292
GO:0045668	negative regulation of osteoblast differentiation	biological_process	8	7	1099	51	17317	0.0410219
GO:0035094	response to nicotine	biological_process	6	7	1099	51	17317	0.0410219
GO:0022008	neurogenesis	biological_process	6	8	1099	62	17317	0.0414327
GO:0050727	regulation of inflammatory response	biological_process	8	8	1099	62	17317	0.0414327
GO:0009725	response to hormone	biological_process	5	10	1099	85	17317	0.0424441
GO:0071526	semaphorin-plexin signaling pathway	biological_process	6	5	1099	31	17317	0.0438047
GO:0030155	regulation of cell adhesion	biological_process	5	5	1099	31	17317	0.0438047
GO:0016597	amino acid binding	molecular_function	7	5	1099	31	17317	0.0438047
GO:0032420	stereocilium	cellular_component	6	5	1099	31	17317	0.0438047
GO:0050918	positive chemotaxis	biological_process	6	5	1099	31	17317	0.0438047
GO:0032743	positive regulation of interleukin-2 production	biological_process	8	3	1099	13	17317	0.0451725
GO:0045198	establishment of epithelial cell apical/basal polarity	biological_process	8	3	1099	13	17317	0.0451725
GO:0071257	cellular response to electrical stimulus	biological_process	6	3	1099	13	17317	0.0451725
GO:0090280	positive regulation of calcium ion import	biological_process	10	3	1099	13	17317	0.0451725
GO:0001886	endothelial cell morphogenesis	biological_process	9	3	1099	13	17317	0.0451725
GO:0051246	regulation of protein metabolic process	biological_process	7	3	1099	13	17317	0.0451725
GO:0030195	negative regulation of blood coagulation	biological_process	8	3	1099	13	17317	0.0451725
GO:0010738	regulation of protein kinase A signaling	biological_process	9	3	1099	13	17317	0.0451725
GO:0001553	luteinization	biological_process	5	3	1099	13	17317	0.0451725
GO:0032426	stereocilium tip	cellular_component	4	3	1099	13	17317	0.0451725
GO:0014912	negative regulation of smooth muscle cell migration	biological_process	9	3	1099	13	17317	0.0451725
GO:0034097	response to cytokine	biological_process	6	10	1099	86	17317	0.0454177
GO:0071276	cellular response to cadmium ion	biological_process	8	4	1099	22	17317	0.0472471
GO:0045672	positive regulation of osteoclast differentiation	biological_process	10	4	1099	22	17317	0.0472471
GO:0048843	negative regulation of axon extension involved in axon guidance	biological_process	9	4	1099	22	17317	0.0472471
GO:0017022	myosin binding	molecular_function	6	4	1099	22	17317	0.0472471
GO:0043552	positive regulation of phosphatidylinositol 3-kinase activity	biological_process	10	4	1099	22	17317	0.0472471
GO:0034976	response to endoplasmic reticulum stress	biological_process	6	9	1099	75	17317	0.0472806
GO:0009968	negative regulation of signal transduction	biological_process	8	9	1099	75	17317	0.0472806
GO:0045740	positive regulation of DNA replication	biological_process	10	6	1099	42	17317	0.0478441
GO:0032868	response to insulin	biological_process	7	10	1099	87	17317	0.048529
GO:0014704	intercalated disc	cellular_component	6	7	1099	53	17317	0.0490362
GO:0007613	memory	biological_process	5	9	1099	76	17317	0.0507483
GO:0009749	response to glucose	biological_process	9	9	1099	76	17317	0.0507483
GO:0006869	lipid transport	biological_process	7	9	1099	76	17317	0.0507483
GO:0019957	C-C chemokine binding	molecular_function	7	2	1099	6	17317	0.0508669
GO:0032534	regulation of microvillus assembly	biological_process	10	2	1099	6	17317	0.0508669
GO:0003416	endochondral bone growth	biological_process	6	2	1099	6	17317	0.0508669
GO:0071409	cellular response to cycloheximide	biological_process	7	2	1099	6	17317	0.0508669
GO:0051150	regulation of smooth muscle cell differentiation	biological_process	8	2	1099	6	17317	0.0508669
GO:0044336	canonical Wnt signaling pathway involved in negative regulation of apoptotic process	biological_process	9	2	1099	6	17317	0.0508669
GO:0032388	positive regulation of intracellular transport	biological_process	8	2	1099	6	17317	0.0508669
GO:0047134	protein-disulfide reductase activity	molecular_function	7	2	1099	6	17317	0.0508669
GO:0010890	positive regulation of sequestering of triglyceride	biological_process	7	2	1099	6	17317	0.0508669
GO:0032819	positive regulation of natural killer cell proliferation	biological_process	10	2	1099	6	17317	0.0508669
GO:0017034	Rap guanyl-nucleotide exchange factor activity	molecular_function	9	2	1099	6	17317	0.0508669
GO:0036157	outer dynein arm	cellular_component	7	2	1099	6	17317	0.0508669
GO:0010940	positive regulation of necrotic cell death	biological_process	8	2	1099	6	17317	0.0508669
GO:0051354	negative regulation of oxidoreductase activity	biological_process	7	2	1099	6	17317	0.0508669
GO:0004630	phospholipase D activity	molecular_function	8	2	1099	6	17317	0.0508669
GO:0071871	response to epinephrine	biological_process	8	2	1099	6	17317	0.0508669
GO:0005858	axonemal dynein complex	cellular_component	6	2	1099	6	17317	0.0508669
GO:0016595	glutamate binding	molecular_function	8	2	1099	6	17317	0.0508669
GO:0014731	spectrin-associated cytoskeleton	cellular_component	7	2	1099	6	17317	0.0508669
GO:0004112	cyclic-nucleotide phosphodiesterase activity	molecular_function	8	2	1099	6	17317	0.0508669
GO:0055015	ventricular cardiac muscle cell development	biological_process	9	2	1099	6	17317	0.0508669
GO:0008211	glucocorticoid metabolic process	biological_process	7	2	1099	6	17317	0.0508669
GO:0043576	regulation of respiratory gaseous exchange	biological_process	6	2	1099	6	17317	0.0508669
GO:0001660	fever generation	biological_process	9	2	1099	6	17317	0.0508669
GO:0009143	nucleoside triphosphate catabolic process	biological_process	9	2	1099	6	17317	0.0508669
GO:0014910	regulation of smooth muscle cell migration	biological_process	8	2	1099	6	17317	0.0508669
GO:0043515	kinetochore binding	molecular_function	5	2	1099	6	17317	0.0508669
GO:1990646	cellular response to prolactin	biological_process	8	2	1099	6	17317	0.0508669
GO:0004064	arylesterase activity	molecular_function	7	2	1099	6	17317	0.0508669
GO:0002925	positive regulation of humoral immune response mediated by circulating immunoglobulin	biological_process	12	2	1099	6	17317	0.0508669
GO:0017121	phospholipid scrambling	biological_process	7	2	1099	6	17317	0.0508669
GO:0035529	NADH pyrophosphatase activity	molecular_function	9	2	1099	6	17317	0.0508669
GO:0035814	negative regulation of renal sodium excretion	biological_process	9	2	1099	6	17317	0.0508669
GO:2001269	positive regulation of cysteine-type endopeptidase activity involved in apoptotic signaling pathway	biological_process	11	2	1099	6	17317	0.0508669
GO:0004033	aldo-keto reductase (NADP) activity	molecular_function	7	2	1099	6	17317	0.0508669
GO:0006957	complement activation, alternative pathway	biological_process	6	2	1099	6	17317	0.0508669
GO:0046903	secretion	biological_process	6	2	1099	6	17317	0.0508669
GO:2000503	positive regulation of natural killer cell chemotaxis	biological_process	10	2	1099	6	17317	0.0508669
GO:0008366	axon ensheathment	biological_process	5	2	1099	6	17317	0.0508669
GO:0004331	fructose-2,6-bisphosphate 2-phosphatase activity	molecular_function	10	2	1099	6	17317	0.0508669
GO:0007260	tyrosine phosphorylation of STAT protein	biological_process	11	2	1099	6	17317	0.0508669
GO:0031995	insulin-like growth factor II binding	molecular_function	7	2	1099	6	17317	0.0508669
GO:0043549	regulation of kinase activity	biological_process	10	2	1099	6	17317	0.0508669
GO:0030643	cellular phosphate ion homeostasis	biological_process	11	2	1099	6	17317	0.0508669
GO:0071723	lipopeptide binding	molecular_function	5	2	1099	6	17317	0.0508669
GO:0046883	regulation of hormone secretion	biological_process	7	2	1099	6	17317	0.0508669
GO:0070670	response to interleukin-4	biological_process	7	2	1099	6	17317	0.0508669
GO:0019800	peptide cross-linking via chondroitin 4-sulfate glycosaminoglycan	biological_process	10	2	1099	6	17317	0.0508669
GO:1904637	cellular response to ionomycin	biological_process	8	2	1099	6	17317	0.0508669
GO:0030261	chromosome condensation	biological_process	9	2	1099	6	17317	0.0508669
GO:0010891	negative regulation of sequestering of triglyceride	biological_process	7	2	1099	6	17317	0.0508669
GO:1900118	negative regulation of execution phase of apoptosis	biological_process	10	2	1099	6	17317	0.0508669
GO:0042904	9-cis-retinoic acid biosynthetic process	biological_process	12	2	1099	6	17317	0.0508669
GO:2000483	negative regulation of interleukin-8 secretion	biological_process	9	2	1099	6	17317	0.0508669
GO:0005828	kinetochore microtubule	cellular_component	9	2	1099	6	17317	0.0508669
GO:0008626	granzyme-mediated apoptotic signaling pathway	biological_process	6	2	1099	6	17317	0.0508669
GO:0032792	negative regulation of CREB transcription factor activity	biological_process	7	2	1099	6	17317	0.0508669
GO:0002904	positive regulation of B cell apoptotic process	biological_process	12	2	1099	6	17317	0.0508669
GO:0005085	guanyl-nucleotide exchange factor activity	molecular_function	7	10	1099	88	17317	0.0517799
GO:0045202	synapse	cellular_component	3	27	1099	306	17317	0.0520561
GO:0051216	cartilage development	biological_process	6	8	1099	65	17317	0.0524985
GO:0045787	positive regulation of cell cycle	biological_process	7	6	1099	43	17317	0.0527441
GO:0010043	response to zinc ion	biological_process	7	6	1099	43	17317	0.0527441
GO:0042742	defense response to bacterium	biological_process	8	9	1099	77	17317	0.054379
GO:0035605	peptidyl-cysteine S-nitrosylase activity	molecular_function	6	4	1099	23	17317	0.0544248
GO:0042311	vasodilation	biological_process	10	4	1099	23	17317	0.0544248
GO:0035606	peptidyl-cysteine S-trans-nitrosylation	biological_process	11	4	1099	23	17317	0.0544248
GO:0004032	alditol:NADP+ 1-oxidoreductase activity	molecular_function	9	4	1099	23	17317	0.0544248
GO:0000987	proximal promoter sequence-specific DNA binding	molecular_function	9	4	1099	23	17317	0.0544248
GO:0071548	response to dexamethasone	biological_process	6	4	1099	23	17317	0.0544248
GO:0008637	apoptotic mitochondrial changes	biological_process	7	4	1099	23	17317	0.0544248
GO:0031639	plasminogen activation	biological_process	10	3	1099	14	17317	0.0548567
GO:0010389	regulation of G2/M transition of mitotic cell cycle	biological_process	9	3	1099	14	17317	0.0548567
GO:0042923	neuropeptide binding	molecular_function	6	3	1099	14	17317	0.0548567
GO:0005740	mitochondrial envelope	cellular_component	6	3	1099	14	17317	0.0548567
GO:0006536	glutamate metabolic process	biological_process	11	3	1099	14	17317	0.0548567
GO:0004869	cysteine-type endopeptidase inhibitor activity	molecular_function	8	3	1099	14	17317	0.0548567
GO:0042573	retinoic acid metabolic process	biological_process	11	3	1099	14	17317	0.0548567
GO:0004383	guanylate cyclase activity	molecular_function	5	3	1099	14	17317	0.0548567
GO:0009268	response to pH	biological_process	5	3	1099	14	17317	0.0548567
GO:0043268	positive regulation of potassium ion transport	biological_process	10	3	1099	14	17317	0.0548567
GO:0060992	response to fungicide	biological_process	6	3	1099	14	17317	0.0548567
GO:0006956	complement activation	biological_process	5	3	1099	14	17317	0.0548567
GO:2001222	regulation of neuron migration	biological_process	8	3	1099	14	17317	0.0548567
GO:0050930	induction of positive chemotaxis	biological_process	10	3	1099	14	17317	0.0548567
GO:0060088	auditory receptor cell stereocilium organization	biological_process	9	3	1099	14	17317	0.0548567
GO:0005328	neurotransmitter:sodium symporter activity	molecular_function	5	3	1099	14	17317	0.0548567
GO:0010875	positive regulation of cholesterol efflux	biological_process	11	3	1099	14	17317	0.0548567
GO:0048384	retinoic acid receptor signaling pathway	biological_process	6	3	1099	14	17317	0.0548567
GO:0004527	exonuclease activity	molecular_function	7	3	1099	14	17317	0.0548567
GO:0008074	guanylate cyclase complex, soluble	cellular_component	4	3	1099	14	17317	0.0548567
GO:0005545	1-phosphatidylinositol binding	molecular_function	7	3	1099	14	17317	0.0548567
GO:0014002	astrocyte development	biological_process	7	3	1099	14	17317	0.0548567
GO:0005149	interleukin-1 receptor binding	molecular_function	7	3	1099	14	17317	0.0548567
GO:0045931	positive regulation of mitotic cell cycle	biological_process	8	5	1099	33	17317	0.0552016
GO:0000086	G2/M transition of mitotic cell cycle	biological_process	7	5	1099	33	17317	0.0552016
GO:0000278	mitotic cell cycle	biological_process	5	11	1099	101	17317	0.0552079
GO:0015629	actin cytoskeleton	cellular_component	7	18	1099	189	17317	0.0555637
GO:0051402	neuron apoptotic process	biological_process	7	8	1099	66	17317	0.0565706
GO:0051607	defense response to virus	biological_process	5	13	1099	126	17317	0.0567106
GO:0009314	response to radiation	biological_process	5	6	1099	44	17317	0.0579381
GO:0046677	response to antibiotic	biological_process	5	6	1099	44	17317	0.0579381
GO:0045669	positive regulation of osteoblast differentiation	biological_process	8	7	1099	55	17317	0.0579787
GO:0006874	cellular calcium ion homeostasis	biological_process	11	9	1099	78	17317	0.0581745
GO:0071333	cellular response to glucose stimulus	biological_process	10	9	1099	78	17317	0.0581745
GO:0051726	regulation of cell cycle	biological_process	6	13	1099	127	17317	0.0596845
GO:0043433	negative regulation of DNA binding transcription factor activity	biological_process	6	8	1099	67	17317	0.0608376
GO:0043154	negative regulation of cysteine-type endopeptidase activity involved in apoptotic process	biological_process	10	8	1099	67	17317	0.0608376
GO:0016525	negative regulation of angiogenesis	biological_process	8	8	1099	67	17317	0.0608376
GO:0016358	dendrite development	biological_process	8	5	1099	34	17317	0.0614824
GO:0051412	response to corticosterone	biological_process	9	5	1099	34	17317	0.0614824
GO:2000134	negative regulation of G1/S transition of mitotic cell cycle	biological_process	10	5	1099	34	17317	0.0614824
GO:0030501	positive regulation of bone mineralization	biological_process	8	5	1099	34	17317	0.0614824
GO:0045177	apical part of cell	cellular_component	4	11	1099	103	17317	0.0619254
GO:0048168	regulation of neuronal synaptic plasticity	biological_process	10	4	1099	24	17317	0.0621564
GO:0061003	positive regulation of dendritic spine morphogenesis	biological_process	11	4	1099	24	17317	0.0621564
GO:0016853	isomerase activity	molecular_function	4	4	1099	24	17317	0.0621564
GO:0032722	positive regulation of chemokine production	biological_process	8	4	1099	24	17317	0.0621564
GO:0032094	response to food	biological_process	7	4	1099	24	17317	0.0621564
GO:0030154	cell differentiation	biological_process	5	38	1099	463	17317	0.0624003
GO:0005518	collagen binding	molecular_function	5	7	1099	56	17317	0.0628032
GO:0030885	regulation of myeloid dendritic cell activation	biological_process	7	1	1099	1	17317	0.0634636
GO:0047894	flavonol 3-sulfotransferase activity	molecular_function	7	1	1099	1	17317	0.0634636
GO:0086075	gap junction channel activity involved in cardiac conduction electrical coupling	molecular_function	10	1	1099	1	17317	0.0634636
GO:0099606	microtubule plus-end directed mitotic chromosome migration	biological_process	8	1	1099	1	17317	0.0634636
GO:0072273	metanephric nephron morphogenesis	biological_process	6	1	1099	1	17317	0.0634636
GO:0044546	NLRP3 inflammasome complex assembly	biological_process	8	1	1099	1	17317	0.0634636
GO:0002113	interleukin-33 binding	molecular_function	6	1	1099	1	17317	0.0634636
GO:0042910	xenobiotic transmembrane transporter activity	molecular_function	5	1	1099	1	17317	0.0634636
GO:0098662	inorganic cation transmembrane transport	biological_process	9	1	1099	1	17317	0.0634636
GO:0021873	forebrain neuroblast division	biological_process	9	1	1099	1	17317	0.0634636
GO:0060072	large conductance calcium-activated potassium channel activity	molecular_function	10	1	1099	1	17317	0.0634636
GO:0047988	hydroxyacid-oxoacid transhydrogenase activity	molecular_function	6	1	1099	1	17317	0.0634636
GO:0060332	positive regulation of response to interferon-gamma	biological_process	9	1	1099	1	17317	0.0634636
GO:0032900	negative regulation of neurotrophin production	biological_process	7	1	1099	1	17317	0.0634636
GO:0072679	thymocyte migration	biological_process	7	1	1099	1	17317	0.0634636
GO:0032416	negative regulation of sodium:proton antiporter activity	biological_process	12	1	1099	1	17317	0.0634636
GO:2000184	positive regulation of progesterone biosynthetic process	biological_process	11	1	1099	1	17317	0.0634636
GO:0097627	high-affinity L-ornithine transmembrane transporter activity	molecular_function	8	1	1099	1	17317	0.0634636
GO:0036313	phosphatidylinositol 3-kinase catalytic subunit binding	molecular_function	7	1	1099	1	17317	0.0634636
GO:0090317	negative regulation of intracellular protein transport	biological_process	9	1	1099	1	17317	0.0634636
GO:0047536	2-aminoadipate transaminase activity	molecular_function	7	1	1099	1	17317	0.0634636
GO:0070462	plus-end specific microtubule depolymerization	biological_process	10	1	1099	1	17317	0.0634636
GO:1990858	cellular response to lectin	biological_process	6	1	1099	1	17317	0.0634636
GO:1902078	positive regulation of lateral motor column neuron migration	biological_process	11	1	1099	1	17317	0.0634636
GO:0005283	amino acid:sodium symporter activity	molecular_function	7	1	1099	1	17317	0.0634636
GO:0097180	serine protease inhibitor complex	cellular_component	6	1	1099	1	17317	0.0634636
GO:1990700	nucleolar chromatin organization	biological_process	5	1	1099	1	17317	0.0634636
GO:0071654	positive regulation of chemokine (C-C motif) ligand 1 production	biological_process	9	1	1099	1	17317	0.0634636
GO:0002384	hepatic immune response	biological_process	6	1	1099	1	17317	0.0634636
GO:2000478	positive regulation of metanephric glomerular visceral epithelial cell development	biological_process	9	1	1099	1	17317	0.0634636
GO:0019637	organophosphate metabolic process	biological_process	6	1	1099	1	17317	0.0634636
GO:0005369	taurine:sodium symporter activity	molecular_function	7	1	1099	1	17317	0.0634636
GO:0043244	regulation of protein complex disassembly	biological_process	7	1	1099	1	17317	0.0634636
GO:0071637	regulation of monocyte chemotactic protein-1 production	biological_process	8	1	1099	1	17317	0.0634636
GO:0061507	cyclic-GMP-AMP binding	molecular_function	7	1	1099	1	17317	0.0634636
GO:1903597	negative regulation of gap junction assembly	biological_process	9	1	1099	1	17317	0.0634636
GO:0033798	thyroxine 5-deiodinase activity	molecular_function	5	1	1099	1	17317	0.0634636
GO:0071104	response to interleukin-9	biological_process	7	1	1099	1	17317	0.0634636
GO:1990435	upper tip-link density	cellular_component	6	1	1099	1	17317	0.0634636
GO:0097291	renal phosphate ion absorption	biological_process	7	1	1099	1	17317	0.0634636
GO:1904620	cellular response to dimethyl sulfoxide	biological_process	7	1	1099	1	17317	0.0634636
GO:0046014	negative regulation of T cell homeostatic proliferation	biological_process	12	1	1099	1	17317	0.0634636
GO:0032773	positive regulation of monophenol monooxygenase activity	biological_process	9	1	1099	1	17317	0.0634636
GO:1904075	positive regulation of trophectodermal cell proliferation	biological_process	8	1	1099	1	17317	0.0634636
GO:0085018	maintenance of symbiont-containing vacuole by host	biological_process	7	1	1099	1	17317	0.0634636
GO:0008029	pentraxin receptor activity	molecular_function	7	1	1099	1	17317	0.0634636
GO:0050701	interleukin-1 secretion	biological_process	12	1	1099	1	17317	0.0634636
GO:0071890	bicarbonate binding	molecular_function	6	1	1099	1	17317	0.0634636
GO:1905240	negative regulation of canonical Wnt signaling pathway involved in osteoblast differentiation	biological_process	9	1	1099	1	17317	0.0634636
GO:0036164	cell-abiotic substrate adhesion	biological_process	6	1	1099	1	17317	0.0634636
GO:0034441	plasma lipoprotein particle oxidation	biological_process	9	1	1099	1	17317	0.0634636
GO:0051466	positive regulation of corticotropin-releasing hormone secretion	biological_process	9	1	1099	1	17317	0.0634636
GO:0030844	positive regulation of intermediate filament depolymerization	biological_process	11	1	1099	1	17317	0.0634636
GO:0043251	sodium-dependent organic anion transport	biological_process	9	1	1099	1	17317	0.0634636
GO:0007622	rhythmic behavior	biological_process	4	1	1099	1	17317	0.0634636
GO:0021693	cerebellar Purkinje cell layer structural organization	biological_process	5	1	1099	1	17317	0.0634636
GO:0003193	pulmonary valve formation	biological_process	6	1	1099	1	17317	0.0634636
GO:0061205	paramesonephric duct development	biological_process	5	1	1099	1	17317	0.0634636
GO:0072143	mesangial cell development	biological_process	6	1	1099	1	17317	0.0634636
GO:0050867	positive regulation of cell activation	biological_process	7	1	1099	1	17317	0.0634636
GO:0070091	glucagon secretion	biological_process	11	1	1099	1	17317	0.0634636
GO:0060854	branching involved in lymph vessel morphogenesis	biological_process	7	1	1099	1	17317	0.0634636
GO:1904338	regulation of dopaminergic neuron differentiation	biological_process	10	1	1099	1	17317	0.0634636
GO:0004380	glycoprotein-fucosylgalactoside alpha-N-acetylgalactosaminyltransferase activity	molecular_function	8	1	1099	1	17317	0.0634636
GO:0005914	spot adherens junction	cellular_component	6	1	1099	1	17317	0.0634636
GO:0016679	oxidoreductase activity, acting on diphenols and related substances as donors	molecular_function	5	1	1099	1	17317	0.0634636
GO:1904199	positive regulation of regulation of vascular smooth muscle cell membrane depolarization	biological_process	8	1	1099	1	17317	0.0634636
GO:0035922	foramen ovale closure	biological_process	5	1	1099	1	17317	0.0634636
GO:1903901	negative regulation of viral life cycle	biological_process	8	1	1099	1	17317	0.0634636
GO:0102294	cholesterol dehydrogenase activity	molecular_function	7	1	1099	1	17317	0.0634636
GO:2001057	reactive nitrogen species metabolic process	biological_process	5	1	1099	1	17317	0.0634636
GO:0090075	relaxation of muscle	biological_process	6	1	1099	1	17317	0.0634636
GO:2000590	negative regulation of metanephric mesenchymal cell migration	biological_process	9	1	1099	1	17317	0.0634636
GO:0009444	pyruvate oxidation	biological_process	10	1	1099	1	17317	0.0634636
GO:0002732	positive regulation of dendritic cell cytokine production	biological_process	9	1	1099	1	17317	0.0634636
GO:0047856	dihydrocoumarin hydrolase activity	molecular_function	7	1	1099	1	17317	0.0634636
GO:0015168	glycerol transmembrane transporter activity	molecular_function	6	1	1099	1	17317	0.0634636
GO:0004753	saccharopine dehydrogenase activity	molecular_function	7	1	1099	1	17317	0.0634636
GO:0031294	lymphocyte costimulation	biological_process	4	1	1099	1	17317	0.0634636
GO:0031704	apelin receptor binding	molecular_function	8	1	1099	1	17317	0.0634636
GO:0060588	negative regulation of lipoprotein lipid oxidation	biological_process	10	1	1099	1	17317	0.0634636
GO:1903997	positive regulation of non-membrane spanning protein tyrosine kinase activity	biological_process	13	1	1099	1	17317	0.0634636
GO:1903975	regulation of glial cell migration	biological_process	10	1	1099	1	17317	0.0634636
GO:1990674	Golgi cis cisterna membrane	cellular_component	9	1	1099	1	17317	0.0634636
GO:0070694	deoxyribonucleoside 5'-monophosphate N-glycosidase activity	molecular_function	7	1	1099	1	17317	0.0634636
GO:0120003	hinge region between urothelial plaques of apical plasma membrane	cellular_component	5	1	1099	1	17317	0.0634636
GO:1990874	vascular smooth muscle cell proliferation	biological_process	6	1	1099	1	17317	0.0634636
GO:0035438	cyclic-di-GMP binding	molecular_function	5	1	1099	1	17317	0.0634636
GO:2000771	positive regulation of establishment or maintenance of cell polarity regulating cell shape	biological_process	7	1	1099	1	17317	0.0634636
GO:0042095	interferon-gamma biosynthetic process	biological_process	8	1	1099	1	17317	0.0634636
GO:2000417	negative regulation of eosinophil migration	biological_process	8	1	1099	1	17317	0.0634636
GO:0052925	dol-P-Man:Man(5)GlcNAc(2)-PP-Dol alpha-1,3-mannosyltransferase activity	molecular_function	9	1	1099	1	17317	0.0634636
GO:0003071	renal system process involved in regulation of systemic arterial blood pressure	biological_process	6	1	1099	1	17317	0.0634636
GO:1904205	negative regulation of skeletal muscle hypertrophy	biological_process	10	1	1099	1	17317	0.0634636
GO:0046637	regulation of alpha-beta T cell differentiation	biological_process	10	1	1099	1	17317	0.0634636
GO:0071886	1-(4-iodo-2,5-dimethoxyphenyl)propan-2-amine binding	molecular_function	5	1	1099	1	17317	0.0634636
GO:0021511	spinal cord patterning	biological_process	6	1	1099	1	17317	0.0634636
GO:2000560	positive regulation of CD24 biosynthetic process	biological_process	10	1	1099	1	17317	0.0634636
GO:0050793	regulation of developmental process	biological_process	5	1	1099	1	17317	0.0634636
GO:0042103	positive regulation of T cell homeostatic proliferation	biological_process	12	1	1099	1	17317	0.0634636
GO:2000508	regulation of dendritic cell chemotaxis	biological_process	8	1	1099	1	17317	0.0634636
GO:0060183	apelin receptor signaling pathway	biological_process	6	1	1099	1	17317	0.0634636
GO:0043250	sodium-dependent organic anion transmembrane transporter activity	molecular_function	8	1	1099	1	17317	0.0634636
GO:0005151	interleukin-1, Type II receptor binding	molecular_function	8	1	1099	1	17317	0.0634636
GO:0090094	metanephric cap mesenchymal cell proliferation involved in metanephros development	biological_process	5	1	1099	1	17317	0.0634636
GO:0070572	positive regulation of neuron projection regeneration	biological_process	12	1	1099	1	17317	0.0634636
GO:0035445	borate transmembrane transport	biological_process	8	1	1099	1	17317	0.0634636
GO:0010714	positive regulation of collagen metabolic process	biological_process	7	1	1099	1	17317	0.0634636
GO:0042366	cobalamin catabolic process	biological_process	8	1	1099	1	17317	0.0634636
GO:1903906	regulation of plasma membrane raft polarization	biological_process	7	1	1099	1	17317	0.0634636
GO:1905631	cellular response to glyceraldehyde	biological_process	9	1	1099	1	17317	0.0634636
GO:0005368	taurine transmembrane transporter activity	molecular_function	7	1	1099	1	17317	0.0634636
GO:0010878	cholesterol storage	biological_process	6	1	1099	1	17317	0.0634636
GO:0048855	adenohypophysis morphogenesis	biological_process	5	1	1099	1	17317	0.0634636
GO:0072169	specification of posterior mesonephric tubule identity	biological_process	8	1	1099	1	17317	0.0634636
GO:2000296	negative regulation of hydrogen peroxide catabolic process	biological_process	10	1	1099	1	17317	0.0634636
GO:0071622	regulation of granulocyte chemotaxis	biological_process	8	1	1099	1	17317	0.0634636
GO:0021700	developmental maturation	biological_process	4	1	1099	1	17317	0.0634636
GO:2000534	positive regulation of renal albumin absorption	biological_process	7	1	1099	1	17317	0.0634636
GO:0002541	activation of plasma proteins involved in acute inflammatory response	biological_process	9	1	1099	1	17317	0.0634636
GO:2000342	negative regulation of chemokine (C-X-C motif) ligand 2 production	biological_process	9	1	1099	1	17317	0.0634636
GO:0048073	regulation of eye pigmentation	biological_process	6	1	1099	1	17317	0.0634636
GO:0010933	positive regulation of macrophage tolerance induction	biological_process	8	1	1099	1	17317	0.0634636
GO:0086076	gap junction channel activity involved in atrial cardiac muscle cell-AV node cell electrical coupling	molecular_function	11	1	1099	1	17317	0.0634636
GO:0004411	homogentisate 1,2-dioxygenase activity	molecular_function	7	1	1099	1	17317	0.0634636
GO:0033080	immature T cell proliferation in thymus	biological_process	10	1	1099	1	17317	0.0634636
GO:1902023	L-arginine transport	biological_process	12	1	1099	1	17317	0.0634636
GO:0035379	carbon dioxide transmembrane transporter activity	molecular_function	5	1	1099	1	17317	0.0634636
GO:1905463	negative regulation of DNA duplex unwinding	biological_process	10	1	1099	1	17317	0.0634636
GO:1903045	neural crest cell migration involved in sympathetic nervous system development	biological_process	10	1	1099	1	17317	0.0634636
GO:0034589	hydroxyproline transport	biological_process	11	1	1099	1	17317	0.0634636
GO:0034107	negative regulation of erythrocyte clearance	biological_process	7	1	1099	1	17317	0.0634636
GO:1904474	cellular response to L-dopa	biological_process	7	1	1099	1	17317	0.0634636
GO:1902480	protein localization to mitotic spindle	biological_process	10	1	1099	1	17317	0.0634636
GO:0097626	low-affinity L-arginine transmembrane transporter activity	molecular_function	10	1	1099	1	17317	0.0634636
GO:0015734	taurine transport	biological_process	10	1	1099	1	17317	0.0634636
GO:1900147	regulation of Schwann cell migration	biological_process	11	1	1099	1	17317	0.0634636
GO:1990795	rod bipolar cell terminal bouton	cellular_component	7	1	1099	1	17317	0.0634636
GO:0035731	dinitrosyl-iron complex binding	molecular_function	4	1	1099	1	17317	0.0634636
GO:2000758	positive regulation of peptidyl-lysine acetylation	biological_process	11	1	1099	1	17317	0.0634636
GO:1905665	positive regulation of calcium ion import across plasma membrane	biological_process	15	1	1099	1	17317	0.0634636
GO:0071954	chemokine (C-C motif) ligand 11 production	biological_process	6	1	1099	1	17317	0.0634636
GO:0070488	neutrophil aggregation	biological_process	8	1	1099	1	17317	0.0634636
GO:0001315	age-dependent response to reactive oxygen species	biological_process	7	1	1099	1	17317	0.0634636
GO:0072174	metanephric tubule formation	biological_process	7	1	1099	1	17317	0.0634636
GO:2000097	regulation of smooth muscle cell-matrix adhesion	biological_process	8	1	1099	1	17317	0.0634636
GO:0031477	myosin VII complex	cellular_component	6	1	1099	1	17317	0.0634636
GO:0047130	saccharopine dehydrogenase (NADP+, L-lysine-forming) activity	molecular_function	8	1	1099	1	17317	0.0634636
GO:0086037	sodium:potassium-exchanging ATPase activity involved in regulation of cardiac muscle cell membrane potential	molecular_function	12	1	1099	1	17317	0.0634636
GO:0047225	acetylgalactosaminyl-O-glycosyl-glycoprotein beta-1,6-N-acetylglucosaminyltransferase activity	molecular_function	8	1	1099	1	17317	0.0634636
GO:0021842	chemorepulsion involved in interneuron migration from the subpallium to the cortex	biological_process	7	1	1099	1	17317	0.0634636
GO:0072230	metanephric proximal straight tubule development	biological_process	9	1	1099	1	17317	0.0634636
GO:0045353	interleukin-1 Type II receptor antagonist activity	molecular_function	8	1	1099	1	17317	0.0634636
GO:0038186	lithocholic acid receptor activity	molecular_function	6	1	1099	1	17317	0.0634636
GO:0090096	positive regulation of metanephric cap mesenchymal cell proliferation	biological_process	9	1	1099	1	17317	0.0634636
GO:1901863	positive regulation of muscle tissue development	biological_process	7	1	1099	1	17317	0.0634636
GO:0034119	negative regulation of erythrocyte aggregation	biological_process	9	1	1099	1	17317	0.0634636
GO:0001761	beta-alanine transmembrane transporter activity	molecular_function	5	1	1099	1	17317	0.0634636
GO:0046713	borate transport	biological_process	9	1	1099	1	17317	0.0634636
GO:0099004	calmodulin dependent kinase signaling pathway	biological_process	5	1	1099	1	17317	0.0634636
GO:2000050	regulation of non-canonical Wnt signaling pathway	biological_process	9	1	1099	1	17317	0.0634636
GO:0019341	dibenzo-p-dioxin catabolic process	biological_process	7	1	1099	1	17317	0.0634636
GO:0071966	fungal-type cell wall polysaccharide metabolic process	biological_process	9	1	1099	1	17317	0.0634636
GO:0046680	response to DDT	biological_process	7	1	1099	1	17317	0.0634636
GO:0030184	nitric oxide transmembrane transporter activity	molecular_function	5	1	1099	1	17317	0.0634636
GO:0048773	erythrophore differentiation	biological_process	7	1	1099	1	17317	0.0634636
GO:0061369	negative regulation of testicular blood vessel morphogenesis	biological_process	8	1	1099	1	17317	0.0634636
GO:0061811	ADP-ribosyl cyclase activity	molecular_function	5	1	1099	1	17317	0.0634636
GO:0061196	fungiform papilla development	biological_process	5	1	1099	1	17317	0.0634636
GO:0072184	renal vesicle progenitor cell differentiation	biological_process	7	1	1099	1	17317	0.0634636
GO:0021685	cerebellar granular layer structural organization	biological_process	5	1	1099	1	17317	0.0634636
GO:0046722	lactic acid secretion	biological_process	14	1	1099	1	17317	0.0634636
GO:0072234	metanephric nephron tubule development	biological_process	8	1	1099	1	17317	0.0634636
GO:0051541	elastin metabolic process	biological_process	8	1	1099	1	17317	0.0634636
GO:0016278	lysine N-methyltransferase activity	molecular_function	8	1	1099	1	17317	0.0634636
GO:1990771	clathrin-dependent extracellular exosome endocytosis	biological_process	8	1	1099	1	17317	0.0634636
GO:2000568	positive regulation of memory T cell activation	biological_process	10	1	1099	1	17317	0.0634636
GO:1905609	positive regulation of smooth muscle cell-matrix adhesion	biological_process	9	1	1099	1	17317	0.0634636
GO:0070463	tubulin-dependent ATPase activity	molecular_function	11	1	1099	1	17317	0.0634636
GO:0004152	dihydroorotate dehydrogenase activity	molecular_function	7	1	1099	1	17317	0.0634636
GO:1901624	negative regulation of lymphocyte chemotaxis	biological_process	9	1	1099	1	17317	0.0634636
GO:0019202	amino acid kinase activity	molecular_function	7	1	1099	1	17317	0.0634636
GO:2000775	histone H3-S10 phosphorylation involved in chromosome condensation	biological_process	13	1	1099	1	17317	0.0634636
GO:0051796	negative regulation of timing of catagen	biological_process	10	1	1099	1	17317	0.0634636
GO:1900082	negative regulation of arginine catabolic process	biological_process	10	1	1099	1	17317	0.0634636
GO:0060092	regulation of synaptic transmission, glycinergic	biological_process	9	1	1099	1	17317	0.0634636
GO:0032173	septin collar	cellular_component	8	1	1099	1	17317	0.0634636
GO:2000469	negative regulation of peroxidase activity	biological_process	7	1	1099	1	17317	0.0634636
GO:0032652	regulation of interleukin-1 production	biological_process	7	1	1099	1	17317	0.0634636
GO:0047131	saccharopine dehydrogenase (NAD+, L-glutamate-forming) activity	molecular_function	8	1	1099	1	17317	0.0634636
GO:0003294	atrial ventricular junction remodeling	biological_process	5	1	1099	1	17317	0.0634636
GO:0061450	trophoblast cell migration	biological_process	8	1	1099	1	17317	0.0634636
GO:0009855	determination of bilateral symmetry	biological_process	6	1	1099	1	17317	0.0634636
GO:2000108	positive regulation of leukocyte apoptotic process	biological_process	10	1	1099	1	17317	0.0634636
GO:0072168	specification of anterior mesonephric tubule identity	biological_process	8	1	1099	1	17317	0.0634636
GO:0071877	regulation of adenylate cyclase-inhibiting adrenergic receptor signaling pathway	biological_process	9	1	1099	1	17317	0.0634636
GO:0045234	protein palmitoleylation	biological_process	10	1	1099	1	17317	0.0634636
GO:0070303	negative regulation of stress-activated protein kinase signaling cascade	biological_process	8	1	1099	1	17317	0.0634636
GO:0002552	serotonin secretion by mast cell	biological_process	10	1	1099	1	17317	0.0634636
GO:0086054	bundle of His cell to Purkinje myocyte communication by electrical coupling	biological_process	7	1	1099	1	17317	0.0634636
GO:0032498	detection of muramyl dipeptide	biological_process	7	1	1099	1	17317	0.0634636
GO:2000321	positive regulation of T-helper 17 cell differentiation	biological_process	9	1	1099	1	17317	0.0634636
GO:0044195	nucleoplasmic reticulum	cellular_component	6	1	1099	1	17317	0.0634636
GO:0017095	heparan sulfate 6-O-sulfotransferase activity	molecular_function	8	1	1099	1	17317	0.0634636
GO:1905042	negative regulation of epithelium regeneration	biological_process	8	1	1099	1	17317	0.0634636
GO:0044289	contact site	cellular_component	5	1	1099	1	17317	0.0634636
GO:1902910	positive regulation of melanosome transport	biological_process	7	1	1099	1	17317	0.0634636
GO:1904268	positive regulation of Schwann cell chemotaxis	biological_process	9	1	1099	1	17317	0.0634636
GO:1990697	protein depalmitoleylation	biological_process	10	1	1099	1	17317	0.0634636
GO:0018960	4-nitrophenol metabolic process	biological_process	5	1	1099	1	17317	0.0634636
GO:1905274	regulation of modification of postsynaptic actin cytoskeleton	biological_process	10	1	1099	1	17317	0.0634636
GO:0086029	Purkinje myocyte to ventricular cardiac muscle cell signaling	biological_process	7	1	1099	1	17317	0.0634636
GO:0051134	negative regulation of NK T cell activation	biological_process	11	1	1099	1	17317	0.0634636
GO:1905453	regulation of myeloid progenitor cell differentiation	biological_process	8	1	1099	1	17317	0.0634636
GO:0015172	acidic amino acid transmembrane transporter activity	molecular_function	8	1	1099	1	17317	0.0634636
GO:2000319	regulation of T-helper 17 cell differentiation	biological_process	8	1	1099	1	17317	0.0634636
GO:1901676	positive regulation of histone H3-K27 acetylation	biological_process	12	1	1099	1	17317	0.0634636
GO:0060558	regulation of calcidiol 1-monooxygenase activity	biological_process	8	1	1099	1	17317	0.0634636
GO:0015327	cystine:glutamate antiporter activity	molecular_function	9	1	1099	1	17317	0.0634636
GO:0033036	macromolecule localization	biological_process	4	1	1099	1	17317	0.0634636
GO:2000541	positive regulation of protein geranylgeranylation	biological_process	10	1	1099	1	17317	0.0634636
GO:0035581	sequestering of extracellular ligand from receptor	biological_process	10	1	1099	1	17317	0.0634636
GO:0070736	protein-glycine ligase activity, initiating	molecular_function	8	1	1099	1	17317	0.0634636
GO:0018970	toluene metabolic process	biological_process	6	1	1099	1	17317	0.0634636
GO:0001634	pituitary adenylate cyclase-activating polypeptide receptor activity	molecular_function	7	1	1099	1	17317	0.0634636
GO:1902947	regulation of tau-protein kinase activity	biological_process	11	1	1099	1	17317	0.0634636
GO:0007497	posterior midgut development	biological_process	5	1	1099	1	17317	0.0634636
GO:1904635	positive regulation of glomerular visceral epithelial cell apoptotic process	biological_process	11	1	1099	1	17317	0.0634636
GO:0061881	positive regulation of anterograde axonal transport of mitochondrion	biological_process	9	1	1099	1	17317	0.0634636
GO:0030504	inorganic diphosphate transmembrane transporter activity	molecular_function	8	1	1099	1	17317	0.0634636
GO:0032621	interleukin-18 production	biological_process	5	1	1099	1	17317	0.0634636
GO:0072541	peroxynitrite reductase activity	molecular_function	5	1	1099	1	17317	0.0634636
GO:0061760	antifungal innate immune response	biological_process	6	1	1099	1	17317	0.0634636
GO:0001016	RNA polymerase III regulatory region DNA binding	molecular_function	8	1	1099	1	17317	0.0634636
GO:0071608	macrophage inflammatory protein-1 alpha production	biological_process	6	1	1099	1	17317	0.0634636
GO:0008387	steroid 7-alpha-hydroxylase activity	molecular_function	7	1	1099	1	17317	0.0634636
GO:0051458	corticotropin secretion	biological_process	11	1	1099	1	17317	0.0634636
GO:0033144	negative regulation of intracellular steroid hormone receptor signaling pathway	biological_process	9	1	1099	1	17317	0.0634636
GO:0004686	elongation factor-2 kinase activity	molecular_function	10	1	1099	1	17317	0.0634636
GO:0030003	cellular cation homeostasis	biological_process	9	1	1099	1	17317	0.0634636
GO:0016711	flavonoid 3'-monooxygenase activity	molecular_function	7	1	1099	1	17317	0.0634636
GO:0031715	C5L2 anaphylatoxin chemotactic receptor binding	molecular_function	8	1	1099	1	17317	0.0634636
GO:0045031	ATP-activated adenosine receptor activity	molecular_function	8	1	1099	1	17317	0.0634636
GO:0008038	neuron recognition	biological_process	5	1	1099	1	17317	0.0634636
GO:0021650	vestibulocochlear nerve formation	biological_process	6	1	1099	1	17317	0.0634636
GO:0007208	phospholipase C-activating serotonin receptor signaling pathway	biological_process	7	1	1099	1	17317	0.0634636
GO:0002253	activation of immune response	biological_process	4	1	1099	1	17317	0.0634636
GO:2000446	regulation of macrophage migration inhibitory factor signaling pathway	biological_process	9	1	1099	1	17317	0.0634636
GO:0001225	RNA polymerase II transcription coactivator binding	molecular_function	8	1	1099	1	17317	0.0634636
GO:0042339	keratan sulfate metabolic process	biological_process	6	1	1099	1	17317	0.0634636
GO:0032597	B cell receptor transport into membrane raft	biological_process	13	1	1099	1	17317	0.0634636
GO:0047933	glucose-1,6-bisphosphate synthase activity	molecular_function	7	1	1099	1	17317	0.0634636
GO:0072162	metanephric mesenchymal cell differentiation	biological_process	8	1	1099	1	17317	0.0634636
GO:0035499	carnosine biosynthetic process	biological_process	9	1	1099	1	17317	0.0634636
GO:0034651	cortisol biosynthetic process	biological_process	9	1	1099	1	17317	0.0634636
GO:0003069	acetylcholine-mediated vasodilation involved in regulation of systemic arterial blood pressure	biological_process	8	1	1099	1	17317	0.0634636
GO:0061485	memory T cell proliferation	biological_process	9	1	1099	1	17317	0.0634636
GO:0010464	regulation of mesenchymal cell proliferation	biological_process	7	1	1099	1	17317	0.0634636
GO:0014896	muscle hypertrophy	biological_process	6	1	1099	1	17317	0.0634636
GO:0097639	L-lysine import across plasma membrane	biological_process	13	1	1099	1	17317	0.0634636
GO:0035717	chemokine (C-C motif) ligand 7 binding	molecular_function	8	1	1099	1	17317	0.0634636
GO:0033593	BRCA2-MAGE-D1 complex	cellular_component	4	1	1099	1	17317	0.0634636
GO:0044062	regulation of excretion	biological_process	7	1	1099	1	17317	0.0634636
GO:0051284	positive regulation of sequestering of calcium ion	biological_process	7	1	1099	1	17317	0.0634636
GO:1903949	positive regulation of atrial cardiac muscle cell action potential	biological_process	8	1	1099	1	17317	0.0634636
GO:0038129	ERBB3 signaling pathway	biological_process	9	1	1099	1	17317	0.0634636
GO:0033682	ATP-dependent 5'-3' DNA/RNA helicase activity	molecular_function	12	1	1099	1	17317	0.0634636
GO:0034395	regulation of transcription from RNA polymerase II promoter in response to iron	biological_process	10	1	1099	1	17317	0.0634636
GO:0005332	gamma-aminobutyric acid:sodium symporter activity	molecular_function	8	1	1099	1	17317	0.0634636
GO:0036137	kynurenine aminotransferase activity	molecular_function	7	1	1099	1	17317	0.0634636
GO:0035741	activated CD4-positive, alpha-beta T cell proliferation	biological_process	11	1	1099	1	17317	0.0634636
GO:0098657	import into cell	biological_process	6	1	1099	1	17317	0.0634636
GO:0051691	cellular oligosaccharide metabolic process	biological_process	7	1	1099	1	17317	0.0634636
GO:0070994	detection of oxidative stress	biological_process	6	1	1099	1	17317	0.0634636
GO:2001212	regulation of vasculogenesis	biological_process	7	1	1099	1	17317	0.0634636
GO:1900076	regulation of cellular response to insulin stimulus	biological_process	6	1	1099	1	17317	0.0634636
GO:1990843	subsarcolemmal mitochondrion	cellular_component	7	1	1099	1	17317	0.0634636
GO:1902121	lithocholic acid binding	molecular_function	6	1	1099	1	17317	0.0634636
GO:2001264	negative regulation of C-C chemokine binding	biological_process	8	1	1099	1	17317	0.0634636
GO:0004055	argininosuccinate synthase activity	molecular_function	6	1	1099	1	17317	0.0634636
GO:0071401	cellular response to triglyceride	biological_process	8	1	1099	1	17317	0.0634636
GO:1902213	positive regulation of prolactin signaling pathway	biological_process	10	1	1099	1	17317	0.0634636
GO:0032342	aldosterone biosynthetic process	biological_process	9	1	1099	1	17317	0.0634636
GO:0032901	positive regulation of neurotrophin production	biological_process	7	1	1099	1	17317	0.0634636
GO:0070951	regulation of neutrophil mediated killing of gram-negative bacterium	biological_process	9	1	1099	1	17317	0.0634636
GO:0032244	positive regulation of nucleoside transport	biological_process	9	1	1099	1	17317	0.0634636
GO:0044241	lipid digestion	biological_process	5	1	1099	1	17317	0.0634636
GO:0005371	tricarboxylate secondary active transmembrane transporter activity	molecular_function	8	1	1099	1	17317	0.0634636
GO:0098906	regulation of Purkinje myocyte action potential	biological_process	7	1	1099	1	17317	0.0634636
GO:0051712	positive regulation of killing of cells of other organism	biological_process	7	1	1099	1	17317	0.0634636
GO:1904453	positive regulation of potassium:proton exchanging ATPase activity	biological_process	9	1	1099	1	17317	0.0634636
GO:0006965	positive regulation of biosynthetic process of antibacterial peptides active against Gram-positive bacteria	biological_process	12	1	1099	1	17317	0.0634636
GO:1990844	interfibrillar mitochondrion	cellular_component	7	1	1099	1	17317	0.0634636
GO:1903249	negative regulation of citrulline biosynthetic process	biological_process	11	1	1099	1	17317	0.0634636
GO:1901860	positive regulation of mitochondrial DNA metabolic process	biological_process	10	1	1099	1	17317	0.0634636
GO:2000816	negative regulation of mitotic sister chromatid separation	biological_process	11	1	1099	1	17317	0.0634636
GO:1902098	calcitriol binding	molecular_function	5	1	1099	1	17317	0.0634636
GO:0015173	aromatic amino acid transmembrane transporter activity	molecular_function	8	1	1099	1	17317	0.0634636
GO:0042360	vitamin E metabolic process	biological_process	7	1	1099	1	17317	0.0634636
GO:0038030	non-canonical Wnt signaling pathway via MAPK cascade	biological_process	9	1	1099	1	17317	0.0634636
GO:0035730	S-nitrosoglutathione binding	molecular_function	5	1	1099	1	17317	0.0634636
GO:0022894	Intermediate conductance calcium-activated potassium channel activity	molecular_function	10	1	1099	1	17317	0.0634636
GO:1903841	cellular response to arsenite(3-	biological_process	7	1	1099	1	17317	0.0634636
GO:0072599	establishment of protein localization to endoplasmic reticulum	biological_process	9	1	1099	1	17317	0.0634636
GO:0045887	positive regulation of synaptic growth at neuromuscular junction	biological_process	8	1	1099	1	17317	0.0634636
GO:1904998	negative regulation of leukocyte adhesion to arterial endothelial cell	biological_process	10	1	1099	1	17317	0.0634636
GO:0034590	L-hydroxyproline transmembrane transporter activity	molecular_function	9	1	1099	1	17317	0.0634636
GO:0060785	regulation of apoptosis involved in tissue homeostasis	biological_process	9	1	1099	1	17317	0.0634636
GO:1900133	regulation of renin secretion into blood stream	biological_process	7	1	1099	1	17317	0.0634636
GO:0006963	positive regulation of antibacterial peptide biosynthetic process	biological_process	11	1	1099	1	17317	0.0634636
GO:0019807	aspartoacylase activity	molecular_function	7	1	1099	1	17317	0.0634636
GO:2000853	negative regulation of corticosterone secretion	biological_process	12	1	1099	1	17317	0.0634636
GO:1990029	vasomotion	biological_process	8	1	1099	1	17317	0.0634636
GO:0031838	haptoglobin-hemoglobin complex	cellular_component	4	1	1099	1	17317	0.0634636
GO:0032986	protein-DNA complex disassembly	biological_process	7	1	1099	1	17317	0.0634636
GO:1903903	regulation of establishment of T cell polarity	biological_process	9	1	1099	1	17317	0.0634636
GO:0072220	metanephric descending thin limb development	biological_process	6	1	1099	1	17317	0.0634636
GO:0018094	protein polyglycylation	biological_process	11	1	1099	1	17317	0.0634636
GO:0098894	extrinsic component of presynaptic endocytic zone membrane	cellular_component	6	1	1099	1	17317	0.0634636
GO:1903763	gap junction channel activity involved in cell communication by electrical coupling	molecular_function	9	1	1099	1	17317	0.0634636
GO:0098736	negative regulation of the force of heart contraction	biological_process	10	1	1099	1	17317	0.0634636
GO:0001762	beta-alanine transport	biological_process	7	1	1099	1	17317	0.0634636
GO:0071406	cellular response to methylmercury	biological_process	7	1	1099	1	17317	0.0634636
GO:0099607	lateral attachment of mitotic spindle microtubules to kinetochore	biological_process	7	1	1099	1	17317	0.0634636
GO:0015211	purine nucleoside transmembrane transporter activity	molecular_function	7	1	1099	1	17317	0.0634636
GO:0060283	negative regulation of oocyte development	biological_process	8	1	1099	1	17317	0.0634636
GO:0034635	glutathione transport	biological_process	9	1	1099	1	17317	0.0634636
GO:0050726	positive regulation of interleukin-1 alpha biosynthetic process	biological_process	10	1	1099	1	17317	0.0634636
GO:0033676	double-stranded DNA-dependent ATPase activity	molecular_function	12	1	1099	1	17317	0.0634636
GO:0016297	acyl-[acyl-carrier-protein] hydrolase activity	molecular_function	8	1	1099	1	17317	0.0634636
GO:0061459	L-arginine transmembrane transporter activity	molecular_function	9	1	1099	1	17317	0.0634636
GO:0047977	hepoxilin-epoxide hydrolase activity	molecular_function	7	1	1099	1	17317	0.0634636
GO:0009590	detection of gravity	biological_process	6	1	1099	1	17317	0.0634636
GO:0044089	positive regulation of cellular component biogenesis	biological_process	6	1	1099	1	17317	0.0634636
GO:0046715	active borate transmembrane transporter activity	molecular_function	8	1	1099	1	17317	0.0634636
GO:0090101	negative regulation of transmembrane receptor protein serine/threonine kinase signaling pathway	biological_process	9	1	1099	1	17317	0.0634636
GO:0060126	somatotropin secreting cell differentiation	biological_process	6	1	1099	1	17317	0.0634636
GO:0034899	trimethylamine monooxygenase activity	molecular_function	7	1	1099	1	17317	0.0634636
GO:0019477	L-lysine catabolic process	biological_process	13	1	1099	1	17317	0.0634636
GO:0047730	carnosine synthase activity	molecular_function	7	1	1099	1	17317	0.0634636
GO:0021919	BMP signaling pathway involved in spinal cord dorsal/ventral patterning	biological_process	11	1	1099	1	17317	0.0634636
GO:2000438	negative regulation of monocyte extravasation	biological_process	9	1	1099	1	17317	0.0634636
GO:1990442	intrinsic apoptotic signaling pathway in response to nitrosative stress	biological_process	7	1	1099	1	17317	0.0634636
GO:0015801	aromatic amino acid transport	biological_process	11	1	1099	1	17317	0.0634636
GO:0044324	regulation of transcription involved in anterior/posterior axis specification	biological_process	10	1	1099	1	17317	0.0634636
GO:0019242	methylglyoxal biosynthetic process	biological_process	7	1	1099	1	17317	0.0634636
GO:0097640	L-ornithine import across plasma membrane	biological_process	13	1	1099	1	17317	0.0634636
GO:0097017	renal protein absorption	biological_process	7	1	1099	1	17317	0.0634636
GO:0070669	response to interleukin-2	biological_process	7	1	1099	1	17317	0.0634636
GO:0006848	pyruvate transport	biological_process	11	1	1099	1	17317	0.0634636
GO:1990794	basolateral part of cell	cellular_component	4	1	1099	1	17317	0.0634636
GO:0010260	animal organ senescence	biological_process	5	1	1099	1	17317	0.0634636
GO:0043924	suramin binding	molecular_function	5	1	1099	1	17317	0.0634636
GO:0045032	ADP-activated adenosine receptor activity	molecular_function	8	1	1099	1	17317	0.0634636
GO:0086078	gap junction channel activity involved in bundle of His cell-Purkinje myocyte electrical coupling	molecular_function	11	1	1099	1	17317	0.0634636
GO:0071105	response to interleukin-11	biological_process	7	1	1099	1	17317	0.0634636
GO:0003097	renal water transport	biological_process	6	1	1099	1	17317	0.0634636
GO:1903429	regulation of cell maturation	biological_process	8	1	1099	1	17317	0.0634636
GO:0071838	cell proliferation in bone marrow	biological_process	4	1	1099	1	17317	0.0634636
GO:0051915	induction of synaptic plasticity by chemical substance	biological_process	12	1	1099	1	17317	0.0634636
GO:0034440	lipid oxidation	biological_process	8	1	1099	1	17317	0.0634636
GO:0004347	glucose-6-phosphate isomerase activity	molecular_function	7	1	1099	1	17317	0.0634636
GO:0098833	presynaptic endocytic zone	cellular_component	4	1	1099	1	17317	0.0634636
GO:0046222	aflatoxin metabolic process	biological_process	7	1	1099	1	17317	0.0634636
GO:1901342	regulation of vasculature development	biological_process	7	1	1099	1	17317	0.0634636
GO:0060739	mesenchymal-epithelial cell signaling involved in prostate gland development	biological_process	4	1	1099	1	17317	0.0634636
GO:0086044	atrial cardiac muscle cell to AV node cell communication by electrical coupling	biological_process	7	1	1099	1	17317	0.0634636
GO:1903403	negative regulation of renal phosphate excretion	biological_process	7	1	1099	1	17317	0.0634636
GO:0010652	positive regulation of cell communication by chemical coupling	biological_process	8	1	1099	1	17317	0.0634636
GO:0050104	L-gulonate 3-dehydrogenase activity	molecular_function	7	1	1099	1	17317	0.0634636
GO:0009220	pyrimidine ribonucleotide biosynthetic process	biological_process	11	1	1099	1	17317	0.0634636
GO:0001987	vasoconstriction of artery involved in baroreceptor response to lowering of systemic arterial blood pressure	biological_process	11	1	1099	1	17317	0.0634636
GO:0086103	G-protein coupled receptor signaling pathway involved in heart process	biological_process	6	1	1099	1	17317	0.0634636
GO:0030237	female sex determination	biological_process	6	1	1099	1	17317	0.0634636
GO:0015126	canalicular bile acid transmembrane transporter activity	molecular_function	6	1	1099	1	17317	0.0634636
GO:0098737	protein insertion into plasma membrane	biological_process	9	1	1099	1	17317	0.0634636
GO:0004062	aryl sulfotransferase activity	molecular_function	7	1	1099	1	17317	0.0634636
GO:1902569	negative regulation of activation of Janus kinase activity	biological_process	12	1	1099	1	17317	0.0634636
GO:0050144	nucleoside deoxyribosyltransferase activity	molecular_function	7	1	1099	1	17317	0.0634636
GO:0035378	carbon dioxide transmembrane transport	biological_process	8	1	1099	1	17317	0.0634636
GO:1904140	negative regulation of microglial cell migration	biological_process	12	1	1099	1	17317	0.0634636
GO:0070342	brown fat cell proliferation	biological_process	5	1	1099	1	17317	0.0634636
GO:0003284	septum primum development	biological_process	7	1	1099	1	17317	0.0634636
GO:0031325	positive regulation of cellular metabolic process	biological_process	7	1	1099	1	17317	0.0634636
GO:0005142	interleukin-11 receptor binding	molecular_function	7	1	1099	1	17317	0.0634636
GO:0061537	glycine secretion, neurotransmission	biological_process	7	1	1099	1	17317	0.0634636
GO:0097442	CA3 pyramidal cell dendrite	cellular_component	7	1	1099	1	17317	0.0634636
GO:0038060	nitric oxide-cGMP-mediated signaling pathway	biological_process	8	1	1099	1	17317	0.0634636
GO:0045130	keratan sulfotransferase activity	molecular_function	7	1	1099	1	17317	0.0634636
GO:2000170	positive regulation of peptidyl-cysteine S-nitrosylation	biological_process	10	1	1099	1	17317	0.0634636
GO:0015195	L-threonine transmembrane transporter activity	molecular_function	7	1	1099	1	17317	0.0634636
GO:0015812	gamma-aminobutyric acid transport	biological_process	7	1	1099	1	17317	0.0634636
GO:0031620	regulation of fever generation	biological_process	10	1	1099	1	17317	0.0634636
GO:0002502	peptide antigen assembly with MHC class I protein complex	biological_process	9	1	1099	1	17317	0.0634636
GO:0018733	3,4-dihydrocoumarin hydrolase activity	molecular_function	7	1	1099	1	17317	0.0634636
GO:0071713	para-aminobenzoyl-glutamate hydrolase activity	molecular_function	7	1	1099	1	17317	0.0634636
GO:0047315	kynurenine-glyoxylate transaminase activity	molecular_function	8	1	1099	1	17317	0.0634636
GO:0033034	positive regulation of myeloid cell apoptotic process	biological_process	10	1	1099	1	17317	0.0634636
GO:0045352	interleukin-1 Type I receptor antagonist activity	molecular_function	8	1	1099	1	17317	0.0634636
GO:0090402	oncogene-induced cell senescence	biological_process	7	1	1099	1	17317	0.0634636
GO:1904779	regulation of protein localization to centrosome	biological_process	8	1	1099	1	17317	0.0634636
GO:0008281	sulfonylurea receptor activity	molecular_function	6	1	1099	1	17317	0.0634636
GO:0090350	negative regulation of cellular organofluorine metabolic process	biological_process	9	1	1099	1	17317	0.0634636
GO:0021666	rhombomere 5 formation	biological_process	6	1	1099	1	17317	0.0634636
GO:0005147	oncostatin-M receptor binding	molecular_function	7	1	1099	1	17317	0.0634636
GO:0009159	deoxyribonucleoside monophosphate catabolic process	biological_process	10	1	1099	1	17317	0.0634636
GO:0032440	2-alkenal reductase [NAD(P)] activity	molecular_function	7	1	1099	1	17317	0.0634636
GO:0048242	epinephrine secretion	biological_process	10	1	1099	1	17317	0.0634636
GO:1901184	regulation of ERBB signaling pathway	biological_process	8	1	1099	1	17317	0.0634636
GO:0031619	homologous chromosome orientation involved in meiotic metaphase I plate congression	biological_process	8	1	1099	1	17317	0.0634636
GO:0072259	metanephric interstitial fibroblast development	biological_process	7	1	1099	1	17317	0.0634636
GO:0060404	axonemal microtubule depolymerization	biological_process	11	1	1099	1	17317	0.0634636
GO:0003174	mitral valve development	biological_process	7	1	1099	1	17317	0.0634636
GO:0032913	negative regulation of transforming growth factor beta3 production	biological_process	9	1	1099	1	17317	0.0634636
GO:0045818	negative regulation of glycogen catabolic process	biological_process	11	1	1099	1	17317	0.0634636
GO:1990451	cellular stress response to acidic pH	biological_process	6	1	1099	1	17317	0.0634636
GO:0021759	globus pallidus development	biological_process	6	1	1099	1	17317	0.0634636
GO:0051780	behavioral response to nutrient	biological_process	4	1	1099	1	17317	0.0634636
GO:0070576	vitamin D 24-hydroxylase activity	molecular_function	5	1	1099	1	17317	0.0634636
GO:0035645	enteric smooth muscle cell differentiation	biological_process	8	1	1099	1	17317	0.0634636
GO:0004381	fucosylgalactoside 3-alpha-galactosyltransferase activity	molecular_function	8	1	1099	1	17317	0.0634636
GO:0004621	glycosylphosphatidylinositol phospholipase D activity	molecular_function	9	1	1099	1	17317	0.0634636
GO:0003096	renal sodium ion transport	biological_process	6	1	1099	1	17317	0.0634636
GO:0015826	threonine transport	biological_process	8	1	1099	1	17317	0.0634636
GO:0072232	metanephric proximal convoluted tubule segment 2 development	biological_process	7	1	1099	1	17317	0.0634636
GO:1905456	regulation of lymphoid progenitor cell differentiation	biological_process	8	1	1099	1	17317	0.0634636
GO:0032500	muramyl dipeptide binding	molecular_function	5	1	1099	1	17317	0.0634636
GO:0050698	proteoglycan sulfotransferase activity	molecular_function	7	1	1099	1	17317	0.0634636
GO:0061812	cyclic ADP-ribose hydrolase	molecular_function	7	1	1099	1	17317	0.0634636
GO:0002737	negative regulation of plasmacytoid dendritic cell cytokine production	biological_process	10	1	1099	1	17317	0.0634636
GO:0050716	positive regulation of interleukin-1 secretion	biological_process	9	1	1099	1	17317	0.0634636
GO:1901074	regulation of engulfment of apoptotic cell	biological_process	9	1	1099	1	17317	0.0634636
GO:0071282	cellular response to iron(II) ion	biological_process	9	1	1099	1	17317	0.0634636
GO:0060901	regulation of hair cycle by canonical Wnt signaling pathway	biological_process	7	1	1099	1	17317	0.0634636
GO:1902567	negative regulation of eosinophil activation	biological_process	8	1	1099	1	17317	0.0634636
GO:0015860	purine nucleoside transmembrane transport	biological_process	8	1	1099	1	17317	0.0634636
GO:1903280	negative regulation of calcium:sodium antiporter activity	biological_process	9	1	1099	1	17317	0.0634636
GO:0003421	growth plate cartilage axis specification	biological_process	6	1	1099	1	17317	0.0634636
GO:0030656	regulation of vitamin metabolic process	biological_process	7	1	1099	1	17317	0.0634636
GO:0097457	hippocampal mossy fiber	cellular_component	8	1	1099	1	17317	0.0634636
GO:1900102	negative regulation of endoplasmic reticulum unfolded protein response	biological_process	9	1	1099	1	17317	0.0634636
GO:0004782	sulfinoalanine decarboxylase activity	molecular_function	7	1	1099	1	17317	0.0634636
GO:1904022	positive regulation of G-protein coupled receptor internalization	biological_process	9	1	1099	1	17317	0.0634636
GO:1903909	regulation of receptor clustering	biological_process	9	1	1099	1	17317	0.0634636
GO:0032600	chemokine receptor transport out of membrane raft	biological_process	13	1	1099	1	17317	0.0634636
GO:0046469	platelet activating factor metabolic process	biological_process	9	1	1099	1	17317	0.0634636
GO:0006049	UDP-N-acetylglucosamine catabolic process	biological_process	8	1	1099	1	17317	0.0634636
GO:0050473	arachidonate 15-lipoxygenase activity	molecular_function	7	1	1099	1	17317	0.0634636
GO:1901698	response to nitrogen compound	biological_process	5	1	1099	1	17317	0.0634636
GO:1990699	palmitoleyl hydrolase activity	molecular_function	7	1	1099	1	17317	0.0634636
GO:0010189	vitamin E biosynthetic process	biological_process	7	1	1099	1	17317	0.0634636
GO:1902564	negative regulation of neutrophil activation	biological_process	8	1	1099	1	17317	0.0634636
GO:1903928	cellular response to cyanide	biological_process	7	1	1099	1	17317	0.0634636
GO:0038097	positive regulation of mast cell activation by Fc-epsilon receptor signaling pathway	biological_process	8	1	1099	1	17317	0.0634636
GO:0072183	negative regulation of nephron tubule epithelial cell differentiation	biological_process	10	1	1099	1	17317	0.0634636
GO:0001567	cholesterol 25-hydroxylase activity	molecular_function	7	1	1099	1	17317	0.0634636
GO:1905128	positive regulation of axo-dendritic protein transport	biological_process	8	1	1099	1	17317	0.0634636
GO:0045769	negative regulation of asymmetric cell division	biological_process	8	1	1099	1	17317	0.0634636
GO:2000066	positive regulation of cortisol biosynthetic process	biological_process	10	1	1099	1	17317	0.0634636
GO:0071594	thymocyte aggregation	biological_process	10	1	1099	1	17317	0.0634636
GO:0001010	transcription factor activity, sequence-specific DNA binding transcription factor recruiting	molecular_function	8	1	1099	1	17317	0.0634636
GO:0036487	nitric-oxide synthase inhibitor activity	molecular_function	6	1	1099	1	17317	0.0634636
GO:0070735	protein-glycine ligase activity	molecular_function	7	1	1099	1	17317	0.0634636
GO:0014891	striated muscle atrophy	biological_process	8	1	1099	1	17317	0.0634636
GO:0007225	patched ligand maturation	biological_process	5	1	1099	1	17317	0.0634636
GO:1904655	positive regulation of lung alveolus development	biological_process	7	1	1099	1	17317	0.0634636
GO:0097021	lymphocyte migration into lymphoid organs	biological_process	6	1	1099	1	17317	0.0634636
GO:0055025	positive regulation of cardiac muscle tissue development	biological_process	10	1	1099	1	17317	0.0634636
GO:1904151	positive regulation of microglial cell mediated cytotoxicity	biological_process	8	1	1099	1	17317	0.0634636
GO:0071245	cellular response to carbon monoxide	biological_process	7	1	1099	1	17317	0.0634636
GO:0008431	vitamin E binding	molecular_function	6	1	1099	1	17317	0.0634636
GO:0021660	rhombomere 3 formation	biological_process	6	1	1099	1	17317	0.0634636
GO:0045870	positive regulation of single stranded viral RNA replication via double stranded DNA intermediate	biological_process	11	1	1099	1	17317	0.0634636
GO:1902081	negative regulation of calcium ion import into sarcoplasmic reticulum	biological_process	9	1	1099	1	17317	0.0634636
GO:0006932	substrate-dependent cell migration, cell contraction	biological_process	8	1	1099	1	17317	0.0634636
GO:0048389	intermediate mesoderm development	biological_process	7	1	1099	1	17317	0.0634636
GO:1901611	phosphatidylglycerol binding	molecular_function	6	1	1099	1	17317	0.0634636
GO:0007411	axon guidance	biological_process	6	12	1099	116	17317	0.0642753
GO:0001775	cell activation	biological_process	4	3	1099	15	17317	0.0654393
GO:0009190	cyclic nucleotide biosynthetic process	biological_process	10	3	1099	15	17317	0.0654393
GO:0048029	monosaccharide binding	molecular_function	5	3	1099	15	17317	0.0654393
GO:0030574	collagen catabolic process	biological_process	5	3	1099	15	17317	0.0654393
GO:0051481	negative regulation of cytosolic calcium ion concentration	biological_process	13	3	1099	15	17317	0.0654393
GO:0014067	negative regulation of phosphatidylinositol 3-kinase signaling	biological_process	10	3	1099	15	17317	0.0654393
GO:0032930	positive regulation of superoxide anion generation	biological_process	10	3	1099	15	17317	0.0654393
GO:0008305	integrin complex	cellular_component	5	3	1099	15	17317	0.0654393
GO:0050850	positive regulation of calcium-mediated signaling	biological_process	10	3	1099	15	17317	0.0654393
GO:0010001	glial cell differentiation	biological_process	6	3	1099	15	17317	0.0654393
GO:0070848	response to growth factor	biological_process	6	3	1099	15	17317	0.0654393
GO:0043653	mitochondrial fragmentation involved in apoptotic process	biological_process	8	3	1099	15	17317	0.0654393
GO:0071356	cellular response to tumor necrosis factor	biological_process	8	13	1099	129	17317	0.0659417
GO:0030182	neuron differentiation	biological_process	6	13	1099	129	17317	0.0659417
GO:0000226	microtubule cytoskeleton organization	biological_process	7	12	1099	117	17317	0.0676929
GO:0032760	positive regulation of tumor necrosis factor production	biological_process	9	7	1099	57	17317	0.0678648
GO:0021762	substantia nigra development	biological_process	6	5	1099	35	17317	0.0681501
GO:0045907	positive regulation of vasoconstriction	biological_process	10	5	1099	35	17317	0.0681501
GO:0016494	C-X-C chemokine receptor activity	molecular_function	9	2	1099	7	17317	0.0682725
GO:0048273	mitogen-activated protein kinase p38 binding	molecular_function	9	2	1099	7	17317	0.0682725
GO:0071421	manganese ion transmembrane transport	biological_process	11	2	1099	7	17317	0.0682725
GO:0018401	peptidyl-proline hydroxylation to 4-hydroxy-L-proline	biological_process	7	2	1099	7	17317	0.0682725
GO:0031346	positive regulation of cell projection organization	biological_process	8	2	1099	7	17317	0.0682725
GO:0031419	cobalamin binding	molecular_function	5	2	1099	7	17317	0.0682725
GO:0001574	ganglioside biosynthetic process	biological_process	11	2	1099	7	17317	0.0682725
GO:0032367	intracellular cholesterol transport	biological_process	10	2	1099	7	17317	0.0682725
GO:0046581	intercellular canaliculus	cellular_component	5	2	1099	7	17317	0.0682725
GO:0018023	peptidyl-lysine trimethylation	biological_process	12	2	1099	7	17317	0.0682725
GO:0046033	AMP metabolic process	biological_process	11	2	1099	7	17317	0.0682725
GO:0006527	arginine catabolic process	biological_process	12	2	1099	7	17317	0.0682725
GO:0008519	ammonium transmembrane transporter activity	molecular_function	7	2	1099	7	17317	0.0682725
GO:0046069	cGMP catabolic process	biological_process	12	2	1099	7	17317	0.0682725
GO:0060346	bone trabecula formation	biological_process	6	2	1099	7	17317	0.0682725
GO:0071373	cellular response to luteinizing hormone stimulus	biological_process	8	2	1099	7	17317	0.0682725
GO:0001936	regulation of endothelial cell proliferation	biological_process	8	2	1099	7	17317	0.0682725
GO:2000020	positive regulation of male gonad development	biological_process	8	2	1099	7	17317	0.0682725
GO:0002639	positive regulation of immunoglobulin production	biological_process	9	2	1099	7	17317	0.0682725
GO:0032873	negative regulation of stress-activated MAPK cascade	biological_process	12	2	1099	7	17317	0.0682725
GO:0031284	positive regulation of guanylate cyclase activity	biological_process	8	2	1099	7	17317	0.0682725
GO:0014050	negative regulation of glutamate secretion	biological_process	10	2	1099	7	17317	0.0682725
GO:0043020	NADPH oxidase complex	cellular_component	6	2	1099	7	17317	0.0682725
GO:0032489	regulation of Cdc42 protein signal transduction	biological_process	12	2	1099	7	17317	0.0682725
GO:0004629	phospholipase C activity	molecular_function	8	2	1099	7	17317	0.0682725
GO:0097227	sperm annulus	cellular_component	5	2	1099	7	17317	0.0682725
GO:0004035	alkaline phosphatase activity	molecular_function	8	2	1099	7	17317	0.0682725
GO:0014808	release of sequestered calcium ion into cytosol by sarcoplasmic reticulum	biological_process	12	2	1099	7	17317	0.0682725
GO:0060463	lung lobe morphogenesis	biological_process	5	2	1099	7	17317	0.0682725
GO:0032287	peripheral nervous system myelin maintenance	biological_process	8	2	1099	7	17317	0.0682725
GO:0042634	regulation of hair cycle	biological_process	6	2	1099	7	17317	0.0682725
GO:0072678	T cell migration	biological_process	6	2	1099	7	17317	0.0682725
GO:0071107	response to parathyroid hormone	biological_process	6	2	1099	7	17317	0.0682725
GO:0045926	negative regulation of growth	biological_process	6	2	1099	7	17317	0.0682725
GO:0042063	gliogenesis	biological_process	7	2	1099	7	17317	0.0682725
GO:0018879	biphenyl metabolic process	biological_process	7	2	1099	7	17317	0.0682725
GO:0071224	cellular response to peptidoglycan	biological_process	8	2	1099	7	17317	0.0682725
GO:0060539	diaphragm development	biological_process	8	2	1099	7	17317	0.0682725
GO:0086036	regulation of cardiac muscle cell membrane potential	biological_process	6	2	1099	7	17317	0.0682725
GO:0033135	regulation of peptidyl-serine phosphorylation	biological_process	10	2	1099	7	17317	0.0682725
GO:0051156	glucose 6-phosphate metabolic process	biological_process	7	2	1099	7	17317	0.0682725
GO:0045545	syndecan binding	molecular_function	6	2	1099	7	17317	0.0682725
GO:0060406	positive regulation of penile erection	biological_process	7	2	1099	7	17317	0.0682725
GO:0034706	sodium channel complex	cellular_component	8	2	1099	7	17317	0.0682725
GO:0047429	nucleoside-triphosphate diphosphatase activity	molecular_function	8	2	1099	7	17317	0.0682725
GO:0061180	mammary gland epithelium development	biological_process	7	2	1099	7	17317	0.0682725
GO:0006531	aspartate metabolic process	biological_process	11	2	1099	7	17317	0.0682725
GO:0015696	ammonium transport	biological_process	8	2	1099	7	17317	0.0682725
GO:0032825	positive regulation of natural killer cell differentiation	biological_process	10	2	1099	7	17317	0.0682725
GO:0043305	negative regulation of mast cell degranulation	biological_process	10	2	1099	7	17317	0.0682725
GO:0032736	positive regulation of interleukin-13 production	biological_process	8	2	1099	7	17317	0.0682725
GO:0030857	negative regulation of epithelial cell differentiation	biological_process	8	2	1099	7	17317	0.0682725
GO:0010659	cardiac muscle cell apoptotic process	biological_process	9	2	1099	7	17317	0.0682725
GO:0018027	peptidyl-lysine dimethylation	biological_process	12	2	1099	7	17317	0.0682725
GO:0045822	negative regulation of heart contraction	biological_process	9	2	1099	7	17317	0.0682725
GO:0045124	regulation of bone resorption	biological_process	8	2	1099	7	17317	0.0682725
GO:0061469	regulation of type B pancreatic cell proliferation	biological_process	8	2	1099	7	17317	0.0682725
GO:0032870	cellular response to hormone stimulus	biological_process	6	6	1099	46	17317	0.0692116
GO:0048146	positive regulation of fibroblast proliferation	biological_process	8	8	1099	69	17317	0.0699622
GO:0030041	actin filament polymerization	biological_process	8	4	1099	25	17317	0.0704331
GO:0050718	positive regulation of interleukin-1 beta secretion	biological_process	10	4	1099	25	17317	0.0704331
GO:0034394	protein localization to cell surface	biological_process	7	4	1099	25	17317	0.0704331
GO:0004365	glyceraldehyde-3-phosphate dehydrogenase (NAD+) (phosphorylating) activity	molecular_function	8	4	1099	25	17317	0.0704331
GO:0006915	apoptotic process	biological_process	6	31	1099	371	17317	0.0713458
GO:0031526	brush border membrane	cellular_component	6	7	1099	58	17317	0.0731639
GO:0060395	SMAD protein signal transduction	biological_process	5	7	1099	58	17317	0.0731639
GO:0032092	positive regulation of protein binding	biological_process	7	8	1099	70	17317	0.0748214
GO:0035115	embryonic forelimb morphogenesis	biological_process	8	5	1099	36	17317	0.0752016
GO:0030864	cortical actin cytoskeleton	cellular_component	8	6	1099	47	17317	0.0752907
GO:0042552	myelination	biological_process	6	6	1099	47	17317	0.0752907
GO:0001890	placenta development	biological_process	6	6	1099	47	17317	0.0752907
GO:0042995	cell projection	cellular_component	4	18	1099	197	17317	0.0762723
GO:0042310	vasoconstriction	biological_process	10	3	1099	16	17317	0.0768765
GO:0032148	activation of protein kinase B activity	biological_process	13	3	1099	16	17317	0.0768765
GO:0012501	programmed cell death	biological_process	5	3	1099	16	17317	0.0768765
GO:0010996	response to auditory stimulus	biological_process	6	3	1099	16	17317	0.0768765
GO:0048566	embryonic digestive tract development	biological_process	7	3	1099	16	17317	0.0768765
GO:0008593	regulation of Notch signaling pathway	biological_process	8	3	1099	16	17317	0.0768765
GO:0004806	triglyceride lipase activity	molecular_function	7	3	1099	16	17317	0.0768765
GO:0010460	positive regulation of heart rate	biological_process	10	3	1099	16	17317	0.0768765
GO:0030033	microvillus assembly	biological_process	8	3	1099	16	17317	0.0768765
GO:0034364	high-density lipoprotein particle	cellular_component	5	3	1099	16	17317	0.0768765
GO:0016327	apicolateral plasma membrane	cellular_component	5	3	1099	16	17317	0.0768765
GO:0016042	lipid catabolic process	biological_process	6	7	1099	59	17317	0.0787005
GO:0042056	chemoattractant activity	molecular_function	7	4	1099	26	17317	0.0792428
GO:0046697	decidualization	biological_process	5	4	1099	26	17317	0.0792428
GO:0004407	histone deacetylase activity	molecular_function	7	4	1099	26	17317	0.0792428
GO:0051018	protein kinase A binding	molecular_function	5	4	1099	26	17317	0.0792428
GO:0051928	positive regulation of calcium ion transport	biological_process	9	4	1099	26	17317	0.0792428
GO:0044325	ion channel binding	molecular_function	5	11	1099	108	17317	0.0809815
GO:0006749	glutathione metabolic process	biological_process	8	6	1099	48	17317	0.081663
GO:0071364	cellular response to epidermal growth factor stimulus	biological_process	6	6	1099	48	17317	0.081663
GO:0006909	phagocytosis	biological_process	7	6	1099	48	17317	0.081663
GO:0030890	positive regulation of B cell proliferation	biological_process	11	5	1099	37	17317	0.0826324
GO:0046686	response to cadmium ion	biological_process	7	5	1099	37	17317	0.0826324
GO:0070542	response to fatty acid	biological_process	6	5	1099	37	17317	0.0826324
GO:0006898	receptor-mediated endocytosis	biological_process	8	10	1099	96	17317	0.0829905
GO:0071230	cellular response to amino acid stimulus	biological_process	7	7	1099	60	17317	0.084474
GO:0045654	positive regulation of megakaryocyte differentiation	biological_process	9	2	1099	8	17317	0.0872921
GO:1901857	positive regulation of cellular respiration	biological_process	8	2	1099	8	17317	0.0872921
GO:0006068	ethanol catabolic process	biological_process	8	2	1099	8	17317	0.0872921
GO:0033081	regulation of T cell differentiation in thymus	biological_process	10	2	1099	8	17317	0.0872921
GO:0050871	positive regulation of B cell activation	biological_process	9	2	1099	8	17317	0.0872921
GO:0010637	negative regulation of mitochondrial fusion	biological_process	10	2	1099	8	17317	0.0872921
GO:0043551	regulation of phosphatidylinositol 3-kinase activity	biological_process	9	2	1099	8	17317	0.0872921
GO:0006703	estrogen biosynthetic process	biological_process	8	2	1099	8	17317	0.0872921
GO:0032691	negative regulation of interleukin-1 beta production	biological_process	9	2	1099	8	17317	0.0872921
GO:0001667	ameboidal-type cell migration	biological_process	7	2	1099	8	17317	0.0872921
GO:0000915	actomyosin contractile ring assembly	biological_process	7	2	1099	8	17317	0.0872921
GO:0021612	facial nerve structural organization	biological_process	6	2	1099	8	17317	0.0872921
GO:0001765	membrane raft assembly	biological_process	7	2	1099	8	17317	0.0872921
GO:0001780	neutrophil homeostasis	biological_process	5	2	1099	8	17317	0.0872921
GO:0019966	interleukin-1 binding	molecular_function	6	2	1099	8	17317	0.0872921
GO:0019373	epoxygenase P450 pathway	biological_process	12	2	1099	8	17317	0.0872921
GO:0060056	mammary gland involution	biological_process	5	2	1099	8	17317	0.0872921
GO:0008429	phosphatidylethanolamine binding	molecular_function	6	2	1099	8	17317	0.0872921
GO:0001848	complement binding	molecular_function	5	2	1099	8	17317	0.0872921
GO:0048484	enteric nervous system development	biological_process	6	2	1099	8	17317	0.0872921
GO:2000369	regulation of clathrin-dependent endocytosis	biological_process	9	2	1099	8	17317	0.0872921
GO:0030619	U1 snRNA binding	molecular_function	8	2	1099	8	17317	0.0872921
GO:0085029	extracellular matrix assembly	biological_process	6	2	1099	8	17317	0.0872921
GO:0002138	retinoic acid biosynthetic process	biological_process	11	2	1099	8	17317	0.0872921
GO:0048102	autophagic cell death	biological_process	6	2	1099	8	17317	0.0872921
GO:0006012	galactose metabolic process	biological_process	8	2	1099	8	17317	0.0872921
GO:0040020	regulation of meiotic nuclear division	biological_process	8	2	1099	8	17317	0.0872921
GO:0008392	arachidonic acid epoxygenase activity	molecular_function	7	2	1099	8	17317	0.0872921
GO:0060020	Bergmann glial cell differentiation	biological_process	8	2	1099	8	17317	0.0872921
GO:0016101	diterpenoid metabolic process	biological_process	9	2	1099	8	17317	0.0872921
GO:0006119	oxidative phosphorylation	biological_process	6	2	1099	8	17317	0.0872921
GO:0001766	membrane raft polarization	biological_process	8	2	1099	8	17317	0.0872921
GO:0043569	negative regulation of insulin-like growth factor receptor signaling pathway	biological_process	9	2	1099	8	17317	0.0872921
GO:0003857	3-hydroxyacyl-CoA dehydrogenase activity	molecular_function	7	2	1099	8	17317	0.0872921
GO:0051967	negative regulation of synaptic transmission, glutamatergic	biological_process	9	2	1099	8	17317	0.0872921
GO:0047498	calcium-dependent phospholipase A2 activity	molecular_function	9	2	1099	8	17317	0.0872921
GO:0072655	establishment of protein localization to mitochondrion	biological_process	9	2	1099	8	17317	0.0872921
GO:0043243	positive regulation of protein complex disassembly	biological_process	8	2	1099	8	17317	0.0872921
GO:0004950	chemokine receptor activity	molecular_function	8	2	1099	8	17317	0.0872921
GO:0043120	tumor necrosis factor binding	molecular_function	6	2	1099	8	17317	0.0872921
GO:0007191	adenylate cyclase-activating dopamine receptor signaling pathway	biological_process	9	2	1099	8	17317	0.0872921
GO:0005243	gap junction channel activity	molecular_function	8	2	1099	8	17317	0.0872921
GO:0032731	positive regulation of interleukin-1 beta production	biological_process	9	2	1099	8	17317	0.0872921
GO:0045602	negative regulation of endothelial cell differentiation	biological_process	9	2	1099	8	17317	0.0872921
GO:0033603	positive regulation of dopamine secretion	biological_process	9	2	1099	8	17317	0.0872921
GO:0030431	sleep	biological_process	4	2	1099	8	17317	0.0872921
GO:0035726	common myeloid progenitor cell proliferation	biological_process	4	2	1099	8	17317	0.0872921
GO:0097345	mitochondrial outer membrane permeabilization	biological_process	10	2	1099	8	17317	0.0872921
GO:0003300	cardiac muscle hypertrophy	biological_process	8	2	1099	8	17317	0.0872921
GO:0005068	transmembrane receptor protein tyrosine kinase adaptor activity	molecular_function	8	2	1099	8	17317	0.0872921
GO:0032494	response to peptidoglycan	biological_process	7	2	1099	8	17317	0.0872921
GO:0032740	positive regulation of interleukin-17 production	biological_process	8	2	1099	8	17317	0.0872921
GO:0035988	chondrocyte proliferation	biological_process	4	2	1099	8	17317	0.0872921
GO:0010881	regulation of cardiac muscle contraction by regulation of the release of sequestered calcium ion	biological_process	9	2	1099	8	17317	0.0872921
GO:0006000	fructose metabolic process	biological_process	8	2	1099	8	17317	0.0872921
GO:0032755	positive regulation of interleukin-6 production	biological_process	8	6	1099	49	17317	0.088326
GO:0050919	negative chemotaxis	biological_process	6	4	1099	27	17317	0.088571
GO:0001784	phosphotyrosine residue binding	molecular_function	7	4	1099	27	17317	0.088571
GO:0005267	potassium channel activity	molecular_function	8	4	1099	27	17317	0.088571
GO:0010035	response to inorganic substance	biological_process	5	4	1099	27	17317	0.088571
GO:0007088	regulation of mitotic nuclear division	biological_process	8	3	1099	17	17317	0.0891196
GO:0032331	negative regulation of chondrocyte differentiation	biological_process	8	3	1099	17	17317	0.0891196
GO:0043032	positive regulation of macrophage activation	biological_process	8	3	1099	17	17317	0.0891196
GO:0035865	cellular response to potassium ion	biological_process	8	3	1099	17	17317	0.0891196
GO:0007099	centriole replication	biological_process	5	3	1099	17	17317	0.0891196
GO:0001964	startle response	biological_process	5	3	1099	17	17317	0.0891196
GO:0031528	microvillus membrane	cellular_component	6	3	1099	17	17317	0.0891196
GO:0019395	fatty acid oxidation	biological_process	10	3	1099	17	17317	0.0891196
GO:0001935	endothelial cell proliferation	biological_process	5	3	1099	17	17317	0.0891196
GO:0006123	mitochondrial electron transport, cytochrome c to oxygen	biological_process	10	3	1099	17	17317	0.0891196
GO:0060252	positive regulation of glial cell proliferation	biological_process	8	3	1099	17	17317	0.0891196
GO:0035994	response to muscle stretch	biological_process	6	3	1099	17	17317	0.0891196
GO:0046325	negative regulation of glucose import	biological_process	10	3	1099	17	17317	0.0891196
GO:0007214	gamma-aminobutyric acid signaling pathway	biological_process	6	3	1099	17	17317	0.0891196
GO:0042104	positive regulation of activated T cell proliferation	biological_process	12	3	1099	17	17317	0.0891196
GO:0043395	heparan sulfate proteoglycan binding	molecular_function	6	3	1099	17	17317	0.0891196
GO:0001222	transcription corepressor binding	molecular_function	7	3	1099	17	17317	0.0891196
GO:0005198	structural molecule activity	molecular_function	3	11	1099	110	17317	0.0895231
GO:0007283	spermatogenesis	biological_process	7	28	1099	338	17317	0.090017
GO:0030900	forebrain development	biological_process	5	8	1099	73	17317	0.0905882
GO:0008134	transcription factor binding	molecular_function	5	28	1099	339	17317	0.092482
GO:0007186	G-protein coupled receptor signaling pathway	biological_process	5	34	1099	423	17317	0.0926231
GO:0045892	negative regulation of transcription, DNA-templated	biological_process	9	38	1099	480	17317	0.0936228
GO:0050728	negative regulation of inflammatory response	biological_process	9	9	1099	86	17317	0.0946012
GO:0000902	cell morphogenesis	biological_process	6	9	1099	86	17317	0.0946012
GO:0043547	positive regulation of GTPase activity	biological_process	8	23	1099	271	17317	0.0952051
GO:0050885	neuromuscular process controlling balance	biological_process	7	6	1099	50	17317	0.0952765
GO:0030145	manganese ion binding	molecular_function	8	6	1099	50	17317	0.0952765
GO:0051209	release of sequestered calcium ion into cytosol	biological_process	8	4	1099	28	17317	0.0984005
GO:0005790	smooth endoplasmic reticulum	cellular_component	7	4	1099	28	17317	0.0984005
GO:0042476	odontogenesis	biological_process	6	4	1099	28	17317	0.0984005
GO:0031663	lipopolysaccharide-mediated signaling pathway	biological_process	6	4	1099	28	17317	0.0984005
GO:0071398	cellular response to fatty acid	biological_process	7	4	1099	28	17317	0.0984005
GO:0032502	developmental process	biological_process	3	4	1099	28	17317	0.0984005
GO:0003341	cilium movement	biological_process	6	4	1099	28	17317	0.0984005
GO:0051894	positive regulation of focal adhesion assembly	biological_process	9	4	1099	28	17317	0.0984005
GO:0072593	reactive oxygen species metabolic process	biological_process	5	5	1099	39	17317	0.0986062
GO:0000287	magnesium ion binding	molecular_function	7	18	1099	205	17317	0.101563
GO:0006919	activation of cysteine-type endopeptidase activity involved in apoptotic process	biological_process	11	8	1099	75	17317	0.102084
GO:0030676	Rac guanyl-nucleotide exchange factor activity	molecular_function	10	3	1099	18	17317	0.102116
GO:0048265	response to pain	biological_process	6	3	1099	18	17317	0.102116
GO:0045778	positive regulation of ossification	biological_process	7	3	1099	18	17317	0.102116
GO:0043171	peptide catabolic process	biological_process	8	3	1099	18	17317	0.102116
GO:0046716	muscle cell cellular homeostasis	biological_process	5	3	1099	18	17317	0.102116
GO:0051770	positive regulation of nitric-oxide synthase biosynthetic process	biological_process	9	3	1099	18	17317	0.102116
GO:0003279	cardiac septum development	biological_process	5	3	1099	18	17317	0.102116
GO:0010269	response to selenium ion	biological_process	6	3	1099	18	17317	0.102116
GO:0001659	temperature homeostasis	biological_process	5	3	1099	18	17317	0.102116
GO:0050482	arachidonic acid secretion	biological_process	9	3	1099	18	17317	0.102116
GO:0009058	biosynthetic process	biological_process	4	3	1099	18	17317	0.102116
GO:0001516	prostaglandin biosynthetic process	biological_process	11	3	1099	18	17317	0.102116
GO:0032526	response to retinoic acid	biological_process	6	7	1099	63	17317	0.1032
GO:0043204	perikaryon	cellular_component	5	12	1099	126	17317	0.103743
GO:0036126	sperm flagellum	cellular_component	5	5	1099	40	17317	0.107133
GO:0019894	kinesin binding	molecular_function	6	5	1099	40	17317	0.107133
GO:0045184	establishment of protein localization	biological_process	6	5	1099	40	17317	0.107133
GO:0003151	outflow tract morphogenesis	biological_process	5	5	1099	40	17317	0.107133
GO:0005524	ATP binding	molecular_function	5	100	1099	1396	17317	0.107216
GO:0007263	nitric oxide mediated signal transduction	biological_process	7	2	1099	9	17317	0.107651
GO:0032940	secretion by cell	biological_process	4	2	1099	9	17317	0.107651
GO:0004028	3-chloroallyl aldehyde dehydrogenase activity	molecular_function	7	2	1099	9	17317	0.107651
GO:0001952	regulation of cell-matrix adhesion	biological_process	7	2	1099	9	17317	0.107651
GO:0010898	positive regulation of triglyceride catabolic process	biological_process	9	2	1099	9	17317	0.107651
GO:0019896	axonal transport of mitochondrion	biological_process	8	2	1099	9	17317	0.107651
GO:0043068	positive regulation of programmed cell death	biological_process	8	2	1099	9	17317	0.107651
GO:0000778	condensed nuclear chromosome kinetochore	cellular_component	6	2	1099	9	17317	0.107651
GO:0003810	protein-glutamine gamma-glutamyltransferase activity	molecular_function	7	2	1099	9	17317	0.107651
GO:0005942	phosphatidylinositol 3-kinase complex	cellular_component	7	2	1099	9	17317	0.107651
GO:0048048	embryonic eye morphogenesis	biological_process	7	2	1099	9	17317	0.107651
GO:2001046	positive regulation of integrin-mediated signaling pathway	biological_process	9	2	1099	9	17317	0.107651
GO:0019215	intermediate filament binding	molecular_function	5	2	1099	9	17317	0.107651
GO:1902617	response to fluoride	biological_process	6	2	1099	9	17317	0.107651
GO:0072687	meiotic spindle	cellular_component	7	2	1099	9	17317	0.107651
GO:0034101	erythrocyte homeostasis	biological_process	5	2	1099	9	17317	0.107651
GO:0070097	delta-catenin binding	molecular_function	5	2	1099	9	17317	0.107651
GO:0051353	positive regulation of oxidoreductase activity	biological_process	7	2	1099	9	17317	0.107651
GO:0010656	negative regulation of muscle cell apoptotic process	biological_process	10	2	1099	9	17317	0.107651
GO:0070206	protein trimerization	biological_process	8	2	1099	9	17317	0.107651
GO:0003958	NADPH-hemoprotein reductase activity	molecular_function	7	2	1099	9	17317	0.107651
GO:0042551	neuron maturation	biological_process	6	2	1099	9	17317	0.107651
GO:0034142	toll-like receptor 4 signaling pathway	biological_process	9	2	1099	9	17317	0.107651
GO:0051057	positive regulation of small GTPase mediated signal transduction	biological_process	10	2	1099	9	17317	0.107651
GO:0050795	regulation of behavior	biological_process	5	2	1099	9	17317	0.107651
GO:0019911	structural constituent of myelin sheath	molecular_function	4	2	1099	9	17317	0.107651
GO:0070166	enamel mineralization	biological_process	8	2	1099	9	17317	0.107651
GO:0006687	glycosphingolipid metabolic process	biological_process	9	2	1099	9	17317	0.107651
GO:0030259	lipid glycosylation	biological_process	8	2	1099	9	17317	0.107651
GO:0060712	spongiotrophoblast layer development	biological_process	6	2	1099	9	17317	0.107651
GO:0008272	sulfate transport	biological_process	9	2	1099	9	17317	0.107651
GO:2000774	positive regulation of cellular senescence	biological_process	7	2	1099	9	17317	0.107651
GO:0000904	cell morphogenesis involved in differentiation	biological_process	7	2	1099	9	17317	0.107651
GO:0019829	cation-transporting ATPase activity	molecular_function	8	2	1099	9	17317	0.107651
GO:0032269	negative regulation of cellular protein metabolic process	biological_process	8	2	1099	9	17317	0.107651
GO:0071313	cellular response to caffeine	biological_process	7	2	1099	9	17317	0.107651
GO:0006596	polyamine biosynthetic process	biological_process	10	2	1099	9	17317	0.107651
GO:0007127	meiosis I	biological_process	7	2	1099	9	17317	0.107651
GO:0070852	cell body fiber	cellular_component	6	2	1099	9	17317	0.107651
GO:0061045	negative regulation of wound healing	biological_process	8	2	1099	9	17317	0.107651
GO:0046549	retinal cone cell development	biological_process	9	2	1099	9	17317	0.107651
GO:0051024	positive regulation of immunoglobulin secretion	biological_process	10	2	1099	9	17317	0.107651
GO:0006739	NADP metabolic process	biological_process	4	2	1099	9	17317	0.107651
GO:0008635	activation of cysteine-type endopeptidase activity involved in apoptotic process by cytochrome c	biological_process	12	2	1099	9	17317	0.107651
GO:0022027	interkinetic nuclear migration	biological_process	8	2	1099	9	17317	0.107651
GO:0043586	tongue development	biological_process	7	2	1099	9	17317	0.107651
GO:0060119	inner ear receptor cell development	biological_process	7	2	1099	9	17317	0.107651
GO:0042554	superoxide anion generation	biological_process	7	2	1099	9	17317	0.107651
GO:0008191	metalloendopeptidase inhibitor activity	molecular_function	8	2	1099	9	17317	0.107651
GO:0060294	cilium movement involved in cell motility	biological_process	7	2	1099	9	17317	0.107651
GO:0070989	oxidative demethylation	biological_process	5	2	1099	9	17317	0.107651
GO:0044752	response to human chorionic gonadotropin	biological_process	7	2	1099	9	17317	0.107651
GO:0001913	T cell mediated cytotoxicity	biological_process	5	2	1099	9	17317	0.107651
GO:0010629	negative regulation of gene expression	biological_process	8	18	1099	207	17317	0.108619
GO:0030286	dynein complex	cellular_component	5	4	1099	29	17317	0.108712
GO:0008089	anterograde axonal transport	biological_process	11	4	1099	29	17317	0.108712
GO:0035116	embryonic hindlimb morphogenesis	biological_process	8	4	1099	29	17317	0.108712
GO:0001837	epithelial to mesenchymal transition	biological_process	7	4	1099	29	17317	0.108712
GO:0030512	negative regulation of transforming growth factor beta receptor signaling pathway	biological_process	10	6	1099	52	17317	0.110023
GO:0009898	cytoplasmic side of plasma membrane	cellular_component	5	6	1099	52	17317	0.110023
GO:0007165	signal transduction	biological_process	4	43	1099	560	17317	0.111939
GO:0003824	catalytic activity	molecular_function	3	11	1099	115	17317	0.113182
GO:0034220	ion transmembrane transport	biological_process	7	8	1099	77	17317	0.114355
GO:0021772	olfactory bulb development	biological_process	5	3	1099	19	17317	0.115811
GO:0022409	positive regulation of cell-cell adhesion	biological_process	7	3	1099	19	17317	0.115811
GO:0032332	positive regulation of chondrocyte differentiation	biological_process	8	3	1099	19	17317	0.115811
GO:0002009	morphogenesis of an epithelium	biological_process	6	3	1099	19	17317	0.115811
GO:0071901	negative regulation of protein serine/threonine kinase activity	biological_process	12	3	1099	19	17317	0.115811
GO:0004550	nucleoside diphosphate kinase activity	molecular_function	7	3	1099	19	17317	0.115811
GO:0030099	myeloid cell differentiation	biological_process	6	3	1099	19	17317	0.115811
GO:0004364	glutathione transferase activity	molecular_function	6	5	1099	41	17317	0.116008
GO:0050660	flavin adenine dinucleotide binding	molecular_function	6	7	1099	65	17317	0.116831
GO:0043565	sequence-specific DNA binding	molecular_function	7	37	1099	476	17317	0.117024
GO:0030324	lung development	biological_process	6	12	1099	129	17317	0.117888
GO:0070059	intrinsic apoptotic signaling pathway in response to endoplasmic reticulum stress	biological_process	7	4	1099	30	17317	0.119486
GO:0001965	G-protein alpha-subunit binding	molecular_function	5	4	1099	30	17317	0.119486
GO:0035902	response to immobilization stress	biological_process	5	4	1099	30	17317	0.119486
GO:0016239	positive regulation of macroautophagy	biological_process	10	4	1099	30	17317	0.119486
GO:0042177	negative regulation of protein catabolic process	biological_process	8	4	1099	30	17317	0.119486
GO:0000976	transcription regulatory region sequence-specific DNA binding	molecular_function	8	8	1099	78	17317	0.120776
GO:0008289	lipid binding	molecular_function	4	12	1099	130	17317	0.122836
GO:0098840	protein transport along microtubule	biological_process	11	1	1099	2	17317	0.122903
GO:0072208	metanephric smooth muscle tissue development	biological_process	9	1	1099	2	17317	0.122903
GO:0006788	heme oxidation	biological_process	9	1	1099	2	17317	0.122903
GO:0033139	regulation of peptidyl-serine phosphorylation of STAT protein	biological_process	11	1	1099	2	17317	0.122903
GO:0098907	regulation of SA node cell action potential	biological_process	7	1	1099	2	17317	0.122903
GO:0060265	positive regulation of respiratory burst involved in inflammatory response	biological_process	8	1	1099	2	17317	0.122903
GO:0007635	chemosensory behavior	biological_process	4	1	1099	2	17317	0.122903
GO:0097441	basal dendrite	cellular_component	7	1	1099	2	17317	0.122903
GO:1902618	cellular response to fluoride	biological_process	7	1	1099	2	17317	0.122903
GO:0038131	neuregulin receptor activity	molecular_function	6	1	1099	2	17317	0.122903
GO:0060101	negative regulation of phagocytosis, engulfment	biological_process	9	1	1099	2	17317	0.122903
GO:0031783	type 5 melanocortin receptor binding	molecular_function	9	1	1099	2	17317	0.122903
GO:0009446	putrescine biosynthetic process	biological_process	11	1	1099	2	17317	0.122903
GO:0003827	alpha-1,3-mannosylglycoprotein 2-beta-N-acetylglucosaminyltransferase activity	molecular_function	8	1	1099	2	17317	0.122903
GO:0019751	polyol metabolic process	biological_process	6	1	1099	2	17317	0.122903
GO:0016500	protein-hormone receptor activity	molecular_function	5	1	1099	2	17317	0.122903
GO:0097477	lateral motor column neuron migration	biological_process	10	1	1099	2	17317	0.122903
GO:2000482	regulation of interleukin-8 secretion	biological_process	8	1	1099	2	17317	0.122903
GO:0004063	aryldialkylphosphatase activity	molecular_function	8	1	1099	2	17317	0.122903
GO:0032902	nerve growth factor production	biological_process	5	1	1099	2	17317	0.122903
GO:0007147	female meiosis II	biological_process	8	1	1099	2	17317	0.122903
GO:0010789	meiotic sister chromatid cohesion involved in meiosis I	biological_process	7	1	1099	2	17317	0.122903
GO:0004999	vasoactive intestinal polypeptide receptor activity	molecular_function	7	1	1099	2	17317	0.122903
GO:0004937	alpha1-adrenergic receptor activity	molecular_function	10	1	1099	2	17317	0.122903
GO:0005415	nucleoside:sodium symporter activity	molecular_function	7	1	1099	2	17317	0.122903
GO:0001996	positive regulation of heart rate by epinephrine-norepinephrine	biological_process	11	1	1099	2	17317	0.122903
GO:0004772	sterol O-acyltransferase activity	molecular_function	8	1	1099	2	17317	0.122903
GO:1903039	positive regulation of leukocyte cell-cell adhesion	biological_process	8	1	1099	2	17317	0.122903
GO:0047522	15-oxoprostaglandin 13-oxidase activity	molecular_function	7	1	1099	2	17317	0.122903
GO:0010819	regulation of T cell chemotaxis	biological_process	9	1	1099	2	17317	0.122903
GO:0050904	diapedesis	biological_process	5	1	1099	2	17317	0.122903
GO:0005130	granulocyte colony-stimulating factor receptor binding	molecular_function	7	1	1099	2	17317	0.122903
GO:0004342	glucosamine-6-phosphate deaminase activity	molecular_function	7	1	1099	2	17317	0.122903
GO:0098528	skeletal muscle fiber differentiation	biological_process	9	1	1099	2	17317	0.122903
GO:0003032	detection of oxygen	biological_process	6	1	1099	2	17317	0.122903
GO:0061162	establishment of monopolar cell polarity	biological_process	6	1	1099	2	17317	0.122903
GO:0045586	regulation of gamma-delta T cell differentiation	biological_process	10	1	1099	2	17317	0.122903
GO:0098905	regulation of bundle of His cell action potential	biological_process	7	1	1099	2	17317	0.122903
GO:0072180	mesonephric duct morphogenesis	biological_process	11	1	1099	2	17317	0.122903
GO:0030250	guanylate cyclase activator activity	molecular_function	6	1	1099	2	17317	0.122903
GO:1903924	estradiol binding	molecular_function	6	1	1099	2	17317	0.122903
GO:0010565	regulation of cellular ketone metabolic process	biological_process	7	1	1099	2	17317	0.122903
GO:0060177	regulation of angiotensin metabolic process	biological_process	8	1	1099	2	17317	0.122903
GO:0046657	folic acid catabolic process	biological_process	8	1	1099	2	17317	0.122903
GO:0044774	mitotic DNA integrity checkpoint	biological_process	6	1	1099	2	17317	0.122903
GO:0072268	pattern specification involved in metanephros development	biological_process	6	1	1099	2	17317	0.122903
GO:0044299	C-fiber	cellular_component	7	1	1099	2	17317	0.122903
GO:0009443	pyridoxal 5'-phosphate salvage	biological_process	9	1	1099	2	17317	0.122903
GO:0050656	3'-phosphoadenosine 5'-phosphosulfate binding	molecular_function	9	1	1099	2	17317	0.122903
GO:0032095	regulation of response to food	biological_process	9	1	1099	2	17317	0.122903
GO:0017116	single-stranded DNA-dependent ATP-dependent DNA helicase activity	molecular_function	12	1	1099	2	17317	0.122903
GO:0002381	immunoglobulin production involved in immunoglobulin mediated immune response	biological_process	6	1	1099	2	17317	0.122903
GO:0005594	collagen type IX trimer	cellular_component	6	1	1099	2	17317	0.122903
GO:0004019	adenylosuccinate synthase activity	molecular_function	6	1	1099	2	17317	0.122903
GO:0005945	6-phosphofructokinase complex	cellular_component	7	1	1099	2	17317	0.122903
GO:2001150	positive regulation of dipeptide transmembrane transport	biological_process	9	1	1099	2	17317	0.122903
GO:0030171	voltage-gated proton channel activity	molecular_function	9	1	1099	2	17317	0.122903
GO:0020018	ciliary pocket membrane	cellular_component	7	1	1099	2	17317	0.122903
GO:0031233	intrinsic component of external side of plasma membrane	cellular_component	6	1	1099	2	17317	0.122903
GO:1903209	positive regulation of oxidative stress-induced cell death	biological_process	8	1	1099	2	17317	0.122903
GO:0038039	G-protein coupled receptor heterodimeric complex	cellular_component	8	1	1099	2	17317	0.122903
GO:0009890	negative regulation of biosynthetic process	biological_process	7	1	1099	2	17317	0.122903
GO:0010643	cell communication by chemical coupling	biological_process	5	1	1099	2	17317	0.122903
GO:2001226	negative regulation of chloride transport	biological_process	10	1	1099	2	17317	0.122903
GO:0004345	glucose-6-phosphate dehydrogenase activity	molecular_function	7	1	1099	2	17317	0.122903
GO:0086065	cell communication involved in cardiac conduction	biological_process	5	1	1099	2	17317	0.122903
GO:0072190	ureter urothelium development	biological_process	7	1	1099	2	17317	0.122903
GO:0036334	epidermal stem cell homeostasis	biological_process	7	1	1099	2	17317	0.122903
GO:0030551	cyclic nucleotide binding	molecular_function	6	1	1099	2	17317	0.122903
GO:0061575	cyclin-dependent protein serine/threonine kinase activator activity	molecular_function	8	1	1099	2	17317	0.122903
GO:2000019	negative regulation of male gonad development	biological_process	8	1	1099	2	17317	0.122903
GO:0140009	L-aspartate import across plasma membrane	biological_process	7	1	1099	2	17317	0.122903
GO:0042568	insulin-like growth factor binary complex	cellular_component	6	1	1099	2	17317	0.122903
GO:0010625	positive regulation of Schwann cell proliferation	biological_process	12	1	1099	2	17317	0.122903
GO:0014826	vein smooth muscle contraction	biological_process	9	1	1099	2	17317	0.122903
GO:1900142	negative regulation of oligodendrocyte apoptotic process	biological_process	11	1	1099	2	17317	0.122903
GO:1903905	positive regulation of establishment of T cell polarity	biological_process	10	1	1099	2	17317	0.122903
GO:2000711	positive regulation of maintenance of meiotic sister chromatid cohesion, centromeric	biological_process	13	1	1099	2	17317	0.122903
GO:1902630	regulation of membrane hyperpolarization	biological_process	6	1	1099	2	17317	0.122903
GO:0038172	interleukin-33-mediated signaling pathway	biological_process	7	1	1099	2	17317	0.122903
GO:0035985	senescence-associated heterochromatin focus	cellular_component	8	1	1099	2	17317	0.122903
GO:0048635	negative regulation of muscle organ development	biological_process	8	1	1099	2	17317	0.122903
GO:0044380	protein localization to cytoskeleton	biological_process	8	1	1099	2	17317	0.122903
GO:0016185	synaptic vesicle budding from presynaptic endocytic zone membrane	biological_process	9	1	1099	2	17317	0.122903
GO:0008355	olfactory learning	biological_process	7	1	1099	2	17317	0.122903
GO:0070173	regulation of enamel mineralization	biological_process	10	1	1099	2	17317	0.122903
GO:0098989	NMDA selective glutamate receptor signaling pathway	biological_process	8	1	1099	2	17317	0.122903
GO:0002532	production of molecular mediator involved in inflammatory response	biological_process	4	1	1099	2	17317	0.122903
GO:0020028	endocytic hemoglobin import	biological_process	9	1	1099	2	17317	0.122903
GO:0002710	negative regulation of T cell mediated immunity	biological_process	10	1	1099	2	17317	0.122903
GO:2000584	negative regulation of platelet-derived growth factor receptor-alpha signaling pathway	biological_process	10	1	1099	2	17317	0.122903
GO:0015272	ATP-activated inward rectifier potassium channel activity	molecular_function	11	1	1099	2	17317	0.122903
GO:2000768	positive regulation of nephron tubule epithelial cell differentiation	biological_process	10	1	1099	2	17317	0.122903
GO:1901898	negative regulation of relaxation of cardiac muscle	biological_process	8	1	1099	2	17317	0.122903
GO:0036336	dendritic cell migration	biological_process	5	1	1099	2	17317	0.122903
GO:0001504	neurotransmitter uptake	biological_process	6	1	1099	2	17317	0.122903
GO:0097575	lateral cell cortex	cellular_component	9	1	1099	2	17317	0.122903
GO:0010827	regulation of glucose transmembrane transport	biological_process	8	1	1099	2	17317	0.122903
GO:0004357	glutamate-cysteine ligase activity	molecular_function	7	1	1099	2	17317	0.122903
GO:0035963	cellular response to interleukin-13	biological_process	8	1	1099	2	17317	0.122903
GO:1904531	positive regulation of actin filament binding	biological_process	9	1	1099	2	17317	0.122903
GO:1990796	photoreceptor cell terminal bouton	cellular_component	7	1	1099	2	17317	0.122903
GO:1990264	peptidyl-tyrosine dephosphorylation involved in inactivation of protein kinase activity	biological_process	11	1	1099	2	17317	0.122903
GO:0001997	positive regulation of the force of heart contraction by epinephrine-norepinephrine	biological_process	12	1	1099	2	17317	0.122903
GO:1902746	regulation of lens fiber cell differentiation	biological_process	8	1	1099	2	17317	0.122903
GO:1990839	response to endothelin	biological_process	7	1	1099	2	17317	0.122903
GO:0060585	positive regulation of prostaglandin-endoperoxide synthase activity	biological_process	8	1	1099	2	17317	0.122903
GO:0035358	regulation of peroxisome proliferator activated receptor signaling pathway	biological_process	8	1	1099	2	17317	0.122903
GO:0034146	toll-like receptor 5 signaling pathway	biological_process	9	1	1099	2	17317	0.122903
GO:0090556	phosphatidylserine-translocating ATPase activity	molecular_function	6	1	1099	2	17317	0.122903
GO:0007354	zygotic determination of anterior/posterior axis, embryo	biological_process	8	1	1099	2	17317	0.122903
GO:0036004	GAF domain binding	molecular_function	6	1	1099	2	17317	0.122903
GO:0071614	linoleic acid epoxygenase activity	molecular_function	6	1	1099	2	17317	0.122903
GO:1904121	phosphatidylethanolamine transporter activity	molecular_function	6	1	1099	2	17317	0.122903
GO:0015827	tryptophan transport	biological_process	8	1	1099	2	17317	0.122903
GO:0014839	myoblast migration involved in skeletal muscle regeneration	biological_process	9	1	1099	2	17317	0.122903
GO:0097752	regulation of DNA stability	biological_process	5	1	1099	2	17317	0.122903
GO:0050135	NAD(P)+ nucleosidase activity	molecular_function	7	1	1099	2	17317	0.122903
GO:0005310	dicarboxylic acid transmembrane transporter activity	molecular_function	7	1	1099	2	17317	0.122903
GO:0042489	negative regulation of odontogenesis of dentin-containing tooth	biological_process	10	1	1099	2	17317	0.122903
GO:0002114	interleukin-33 receptor activity	molecular_function	7	1	1099	2	17317	0.122903
GO:0006233	dTDP biosynthetic process	biological_process	12	1	1099	2	17317	0.122903
GO:0070280	pyridoxal binding	molecular_function	6	1	1099	2	17317	0.122903
GO:0070561	vitamin D receptor signaling pathway	biological_process	6	1	1099	2	17317	0.122903
GO:0071895	odontoblast differentiation	biological_process	9	1	1099	2	17317	0.122903
GO:0002790	peptide secretion	biological_process	9	1	1099	2	17317	0.122903
GO:0002537	nitric oxide production involved in inflammatory response	biological_process	5	1	1099	2	17317	0.122903
GO:0006677	glycosylceramide metabolic process	biological_process	10	1	1099	2	17317	0.122903
GO:0007057	spindle assembly involved in female meiosis I	biological_process	6	1	1099	2	17317	0.122903
GO:0003953	NAD+ nucleosidase activity	molecular_function	7	1	1099	2	17317	0.122903
GO:0002333	transitional one stage B cell differentiation	biological_process	11	1	1099	2	17317	0.122903
GO:0010641	positive regulation of platelet-derived growth factor receptor signaling pathway	biological_process	9	1	1099	2	17317	0.122903
GO:1904976	cellular response to bleomycin	biological_process	7	1	1099	2	17317	0.122903
GO:0046899	nucleoside triphosphate adenylate kinase activity	molecular_function	7	1	1099	2	17317	0.122903
GO:0035620	ceramide transporter activity	molecular_function	6	1	1099	2	17317	0.122903
GO:0071529	cementum mineralization	biological_process	8	1	1099	2	17317	0.122903
GO:0035377	transepithelial water transport	biological_process	8	1	1099	2	17317	0.122903
GO:1903210	glomerular visceral epithelial cell apoptotic process	biological_process	8	1	1099	2	17317	0.122903
GO:0071791	chemokine (C-C motif) ligand 5 binding	molecular_function	8	1	1099	2	17317	0.122903
GO:0072604	interleukin-6 secretion	biological_process	12	1	1099	2	17317	0.122903
GO:0071633	dihydroceramidase activity	molecular_function	7	1	1099	2	17317	0.122903
GO:0017159	pantetheine hydrolase activity	molecular_function	7	1	1099	2	17317	0.122903
GO:2000363	positive regulation of prostaglandin-E synthase activity	biological_process	8	1	1099	2	17317	0.122903
GO:0072104	glomerular capillary formation	biological_process	6	1	1099	2	17317	0.122903
GO:1905322	positive regulation of mesenchymal stem cell migration	biological_process	9	1	1099	2	17317	0.122903
GO:0005150	interleukin-1, Type I receptor binding	molecular_function	8	1	1099	2	17317	0.122903
GO:0007231	osmosensory signaling pathway	biological_process	5	1	1099	2	17317	0.122903
GO:0033829	O-fucosylpeptide 3-beta-N-acetylglucosaminyltransferase activity	molecular_function	8	1	1099	2	17317	0.122903
GO:0072111	cell proliferation involved in kidney development	biological_process	4	1	1099	2	17317	0.122903
GO:0042490	mechanoreceptor differentiation	biological_process	7	1	1099	2	17317	0.122903
GO:0017129	triglyceride binding	molecular_function	5	1	1099	2	17317	0.122903
GO:0034125	negative regulation of MyD88-dependent toll-like receptor signaling pathway	biological_process	8	1	1099	2	17317	0.122903
GO:0002920	regulation of humoral immune response	biological_process	7	1	1099	2	17317	0.122903
GO:1904640	response to methionine	biological_process	7	1	1099	2	17317	0.122903
GO:0032608	interferon-beta production	biological_process	6	1	1099	2	17317	0.122903
GO:0061184	positive regulation of dermatome development	biological_process	9	1	1099	2	17317	0.122903
GO:0034686	integrin alphav-beta8 complex	cellular_component	6	1	1099	2	17317	0.122903
GO:0051365	cellular response to potassium ion starvation	biological_process	9	1	1099	2	17317	0.122903
GO:0045923	positive regulation of fatty acid metabolic process	biological_process	9	1	1099	2	17317	0.122903
GO:0033862	UMP kinase activity	molecular_function	9	1	1099	2	17317	0.122903
GO:2000098	negative regulation of smooth muscle cell-matrix adhesion	biological_process	9	1	1099	2	17317	0.122903
GO:0042323	negative regulation of circadian sleep/wake cycle, non-REM sleep	biological_process	8	1	1099	2	17317	0.122903
GO:1901201	regulation of extracellular matrix assembly	biological_process	6	1	1099	2	17317	0.122903
GO:2000256	positive regulation of male germ cell proliferation	biological_process	9	1	1099	2	17317	0.122903
GO:0033549	MAP kinase phosphatase activity	molecular_function	9	1	1099	2	17317	0.122903
GO:0097057	TRAF2-GSTP1 complex	cellular_component	4	1	1099	2	17317	0.122903
GO:0004465	lipoprotein lipase activity	molecular_function	8	1	1099	2	17317	0.122903
GO:0071866	negative regulation of apoptotic process in bone marrow	biological_process	10	1	1099	2	17317	0.122903
GO:0032487	regulation of Rap protein signal transduction	biological_process	11	1	1099	2	17317	0.122903
GO:0072092	ureteric bud invasion	biological_process	6	1	1099	2	17317	0.122903
GO:0005967	mitochondrial pyruvate dehydrogenase complex	cellular_component	7	1	1099	2	17317	0.122903
GO:0060143	positive regulation of syncytium formation by plasma membrane fusion	biological_process	7	1	1099	2	17317	0.122903
GO:0009330	DNA topoisomerase complex (ATP-hydrolyzing	cellular_component	4	1	1099	2	17317	0.122903
GO:0070256	negative regulation of mucus secretion	biological_process	9	1	1099	2	17317	0.122903
GO:0010519	negative regulation of phospholipase activity	biological_process	9	1	1099	2	17317	0.122903
GO:0002001	renin secretion into blood stream	biological_process	11	1	1099	2	17317	0.122903
GO:1905017	positive regulation of isoleucine-tRNA ligase activity	biological_process	9	1	1099	2	17317	0.122903
GO:0042986	positive regulation of amyloid precursor protein biosynthetic process	biological_process	10	1	1099	2	17317	0.122903
GO:0015891	siderophore transport	biological_process	7	1	1099	2	17317	0.122903
GO:0034736	cholesterol O-acyltransferase activity	molecular_function	9	1	1099	2	17317	0.122903
GO:0090290	positive regulation of osteoclast proliferation	biological_process	9	1	1099	2	17317	0.122903
GO:1904639	cellular response to resveratrol	biological_process	8	1	1099	2	17317	0.122903
GO:0021979	hypothalamus cell differentiation	biological_process	6	1	1099	2	17317	0.122903
GO:0046226	coumarin catabolic process	biological_process	8	1	1099	2	17317	0.122903
GO:0032010	phagolysosome	cellular_component	10	1	1099	2	17317	0.122903
GO:1990257	piccolo-bassoon transport vesicle	cellular_component	7	1	1099	2	17317	0.122903
GO:0000053	argininosuccinate metabolic process	biological_process	6	1	1099	2	17317	0.122903
GO:0015822	ornithine transport	biological_process	8	1	1099	2	17317	0.122903
GO:0030702	chromatin silencing at centromere	biological_process	6	1	1099	2	17317	0.122903
GO:0043382	positive regulation of memory T cell differentiation	biological_process	8	1	1099	2	17317	0.122903
GO:0031291	Ran protein signal transduction	biological_process	8	1	1099	2	17317	0.122903
GO:0006587	serotonin biosynthetic process from tryptophan	biological_process	11	1	1099	2	17317	0.122903
GO:1905023	positive regulation of threonine-tRNA ligase activity	biological_process	9	1	1099	2	17317	0.122903
GO:0004509	steroid 21-monooxygenase activity	molecular_function	7	1	1099	2	17317	0.122903
GO:1904586	cellular response to putrescine	biological_process	8	1	1099	2	17317	0.122903
GO:0036488	CHOP-C/EBP complex	cellular_component	7	1	1099	2	17317	0.122903
GO:0010983	positive regulation of high-density lipoprotein particle clearance	biological_process	8	1	1099	2	17317	0.122903
GO:0005139	interleukin-7 receptor binding	molecular_function	7	1	1099	2	17317	0.122903
GO:0060940	epithelial to mesenchymal transition involved in cardiac fibroblast development	biological_process	9	1	1099	2	17317	0.122903
GO:0097069	cellular response to thyroxine stimulus	biological_process	7	1	1099	2	17317	0.122903
GO:0071074	eukaryotic initiation factor eIF2 binding	molecular_function	6	1	1099	2	17317	0.122903
GO:0061809	NAD+ nucleotidase, cyclic ADP-ribose generating	molecular_function	8	1	1099	2	17317	0.122903
GO:0045920	negative regulation of exocytosis	biological_process	8	1	1099	2	17317	0.122903
GO:0003366	cell-matrix adhesion involved in ameboidal cell migration	biological_process	7	1	1099	2	17317	0.122903
GO:0001994	norepinephrine-epinephrine vasoconstriction involved in regulation of systemic arterial blood pressure	biological_process	11	1	1099	2	17317	0.122903
GO:0072210	metanephric nephron development	biological_process	6	1	1099	2	17317	0.122903
GO:0060466	activation of meiosis involved in egg activation	biological_process	4	1	1099	2	17317	0.122903
GO:0000819	sister chromatid segregation	biological_process	7	1	1099	2	17317	0.122903
GO:0042404	thyroid hormone catabolic process	biological_process	8	1	1099	2	17317	0.122903
GO:0043217	myelin maintenance	biological_process	7	1	1099	2	17317	0.122903
GO:0099056	integral component of presynaptic membrane	cellular_component	6	1	1099	2	17317	0.122903
GO:0060478	acrosomal vesicle exocytosis	biological_process	10	1	1099	2	17317	0.122903
GO:0009992	cellular water homeostasis	biological_process	8	1	1099	2	17317	0.122903
GO:0035026	leading edge cell differentiation	biological_process	7	1	1099	2	17317	0.122903
GO:0009820	alkaloid metabolic process	biological_process	6	1	1099	2	17317	0.122903
GO:0050780	dopamine receptor binding	molecular_function	7	1	1099	2	17317	0.122903
GO:0048632	negative regulation of skeletal muscle tissue growth	biological_process	8	1	1099	2	17317	0.122903
GO:0044330	canonical Wnt signaling pathway involved in positive regulation of wound healing	biological_process	9	1	1099	2	17317	0.122903
GO:0000417	HIR complex	cellular_component	4	1	1099	2	17317	0.122903
GO:0003918	DNA topoisomerase type II (ATP-hydrolyzing) activity	molecular_function	12	1	1099	2	17317	0.122903
GO:0002842	positive regulation of T cell mediated immune response to tumor cell	biological_process	11	1	1099	2	17317	0.122903
GO:0034753	nuclear aryl hydrocarbon receptor complex	cellular_component	6	1	1099	2	17317	0.122903
GO:0031309	integral component of nuclear outer membrane	cellular_component	7	1	1099	2	17317	0.122903
GO:0001808	negative regulation of type IV hypersensitivity	biological_process	11	1	1099	2	17317	0.122903
GO:1905020	positive regulation of methionine-tRNA ligase activity	biological_process	9	1	1099	2	17317	0.122903
GO:0072108	positive regulation of mesenchymal to epithelial transition involved in metanephros morphogenesis	biological_process	10	1	1099	2	17317	0.122903
GO:1904627	response to phorbol 13-acetate 12-myristate	biological_process	7	1	1099	2	17317	0.122903
GO:0016332	establishment or maintenance of polarity of embryonic epithelium	biological_process	5	1	1099	2	17317	0.122903
GO:0098830	presynaptic endosome	cellular_component	8	1	1099	2	17317	0.122903
GO:0046395	carboxylic acid catabolic process	biological_process	7	1	1099	2	17317	0.122903
GO:0035986	senescence-associated heterochromatin focus assembly	biological_process	8	1	1099	2	17317	0.122903
GO:0008478	pyridoxal kinase activity	molecular_function	7	1	1099	2	17317	0.122903
GO:0060721	regulation of spongiotrophoblast cell proliferation	biological_process	7	1	1099	2	17317	0.122903
GO:0009914	hormone transport	biological_process	6	1	1099	2	17317	0.122903
GO:0004798	thymidylate kinase activity	molecular_function	8	1	1099	2	17317	0.122903
GO:0020003	symbiont-containing vacuole	cellular_component	7	1	1099	2	17317	0.122903
GO:0016813	hydrolase activity, acting on carbon-nitrogen (but not peptide) bonds, in linear amidines	molecular_function	6	1	1099	2	17317	0.122903
GO:0045715	negative regulation of low-density lipoprotein particle receptor biosynthetic process	biological_process	10	1	1099	2	17317	0.122903
GO:0003050	regulation of systemic arterial blood pressure by atrial natriuretic peptide	biological_process	9	1	1099	2	17317	0.122903
GO:0008459	chondroitin 6-sulfotransferase activity	molecular_function	8	1	1099	2	17317	0.122903
GO:0004421	hydroxymethylglutaryl-CoA synthase activity	molecular_function	7	1	1099	2	17317	0.122903
GO:0090212	negative regulation of establishment of blood-brain barrier	biological_process	9	1	1099	2	17317	0.122903
GO:0045142	triplex DNA binding	molecular_function	7	1	1099	2	17317	0.122903
GO:2000490	negative regulation of hepatic stellate cell activation	biological_process	8	1	1099	2	17317	0.122903
GO:0036292	DNA rewinding	biological_process	9	1	1099	2	17317	0.122903
GO:1901558	response to metformin	biological_process	6	1	1099	2	17317	0.122903
GO:1901253	negative regulation of intracellular transport of viral material	biological_process	7	1	1099	2	17317	0.122903
GO:1902850	microtubule cytoskeleton organization involved in mitosis	biological_process	8	1	1099	2	17317	0.122903
GO:0051875	pigment granule localization	biological_process	7	1	1099	2	17317	0.122903
GO:0051552	flavone metabolic process	biological_process	6	1	1099	2	17317	0.122903
GO:0090427	activation of meiosis	biological_process	10	1	1099	2	17317	0.122903
GO:1990426	mitotic recombination-dependent replication fork processing	biological_process	10	1	1099	2	17317	0.122903
GO:0016137	glycoside metabolic process	biological_process	7	1	1099	2	17317	0.122903
GO:0022824	transmitter-gated ion channel activity	molecular_function	9	1	1099	2	17317	0.122903
GO:0016933	extracellularly glycine-gated ion channel activity	molecular_function	10	1	1099	2	17317	0.122903
GO:0035728	response to hepatocyte growth factor	biological_process	7	1	1099	2	17317	0.122903
GO:0005292	high-affinity lysine transmembrane transporter activity	molecular_function	10	1	1099	2	17317	0.122903
GO:0002507	tolerance induction	biological_process	4	1	1099	2	17317	0.122903
GO:1905408	negative regulation of creatine transmembrane transporter activity	biological_process	8	1	1099	2	17317	0.122903
GO:0045626	negative regulation of T-helper 1 cell differentiation	biological_process	11	1	1099	2	17317	0.122903
GO:0031780	corticotropin hormone receptor binding	molecular_function	9	1	1099	2	17317	0.122903
GO:0042321	negative regulation of circadian sleep/wake cycle, sleep	biological_process	7	1	1099	2	17317	0.122903
GO:0051120	hepoxilin A3 synthase activity	molecular_function	5	1	1099	2	17317	0.122903
GO:1905290	negative regulation of CAMKK-AMPK signaling cascade	biological_process	11	1	1099	2	17317	0.122903
GO:1902227	negative regulation of macrophage colony-stimulating factor signaling pathway	biological_process	10	1	1099	2	17317	0.122903
GO:0010430	fatty acid omega-oxidation	biological_process	11	1	1099	2	17317	0.122903
GO:0051904	pigment granule transport	biological_process	6	1	1099	2	17317	0.122903
GO:0002863	positive regulation of inflammatory response to antigenic stimulus	biological_process	10	1	1099	2	17317	0.122903
GO:0007386	compartment pattern specification	biological_process	7	1	1099	2	17317	0.122903
GO:0002683	negative regulation of immune system process	biological_process	6	1	1099	2	17317	0.122903
GO:0017109	glutamate-cysteine ligase complex	cellular_component	6	1	1099	2	17317	0.122903
GO:0050294	steroid sulfotransferase activity	molecular_function	7	1	1099	2	17317	0.122903
GO:0032701	negative regulation of interleukin-18 production	biological_process	8	1	1099	2	17317	0.122903
GO:0014740	negative regulation of muscle hyperplasia	biological_process	8	1	1099	2	17317	0.122903
GO:0019222	regulation of metabolic process	biological_process	5	1	1099	2	17317	0.122903
GO:2001303	lipoxin A4 biosynthetic process	biological_process	12	1	1099	2	17317	0.122903
GO:0016505	peptidase activator activity involved in apoptotic process	molecular_function	7	1	1099	2	17317	0.122903
GO:0015939	pantothenate metabolic process	biological_process	6	1	1099	2	17317	0.122903
GO:0002246	wound healing involved in inflammatory response	biological_process	7	1	1099	2	17317	0.122903
GO:0072166	posterior mesonephric tubule development	biological_process	7	1	1099	2	17317	0.122903
GO:0042640	anagen	biological_process	5	1	1099	2	17317	0.122903
GO:1903438	positive regulation of mitotic cytokinetic process	biological_process	11	1	1099	2	17317	0.122903
GO:1990617	CHOP-ATF4 complex	cellular_component	7	1	1099	2	17317	0.122903
GO:0021781	glial cell fate commitment	biological_process	6	1	1099	2	17317	0.122903
GO:0035722	interleukin-12-mediated signaling pathway	biological_process	7	1	1099	2	17317	0.122903
GO:0034059	response to anoxia	biological_process	5	1	1099	2	17317	0.122903
GO:0004800	thyroxine 5'-deiodinase activity	molecular_function	5	1	1099	2	17317	0.122903
GO:2001183	negative regulation of interleukin-12 secretion	biological_process	9	1	1099	2	17317	0.122903
GO:0072033	renal vesicle formation	biological_process	5	1	1099	2	17317	0.122903
GO:0010848	regulation of chromatin disassembly	biological_process	11	1	1099	2	17317	0.122903
GO:0071873	response to norepinephrine	biological_process	8	1	1099	2	17317	0.122903
GO:2000723	negative regulation of cardiac vascular smooth muscle cell differentiation	biological_process	11	1	1099	2	17317	0.122903
GO:0017057	6-phosphogluconolactonase activity	molecular_function	7	1	1099	2	17317	0.122903
GO:0061547	glycogen synthase activity, transferring glucose-1-phosphate	molecular_function	6	1	1099	2	17317	0.122903
GO:0036413	histone H3-R26 citrullination	biological_process	11	1	1099	2	17317	0.122903
GO:0015819	lysine transport	biological_process	8	1	1099	2	17317	0.122903
GO:0010727	negative regulation of hydrogen peroxide metabolic process	biological_process	9	1	1099	2	17317	0.122903
[truncated: 3,581 more rows]
